# Supplementary material for: Chalcogen controlled redox behaviour in peri-substituted S, Se and Te naphthalene derivatives
Source: Royal Society of Chemistry journal article supplement (doi:10.1039/d2nj04737c), 2022-01-01
Supplement: d2nj04737c3.pdf [file d2nj04737c3.pdf]

# Chalcogen controlled redox behaviour in *peri*-substituted S, Se and Te naphthalene derivatives†

Tracey L. Roemmele, Fergus R. Knight, Ellis Crawford, Stuart D. Robertson, Bela E. Bode, Michael Bühl,  
Alexandra M. Z. Slawin, J. Derek Woollins and René T. Boéré

## Electronic Supporting Information

| Table of Contents |                                                                                                       | Page |
|-------------------|-------------------------------------------------------------------------------------------------------|------|
| 1.                | Chart S1 – Graphical Index to Compound Identities                                                     | S2   |
| 2.                | <u>Section 1. Voltammetry Data and Methods</u>                                                        | S3   |
|                   | Further details on voltammetry of <b>A1 – N18</b>                                                     | S4   |
| 3.                | <u>Section 2. Computational Section</u>                                                               | S17  |
|                   | Exhaustive Search of Conformational Space for Compounds in Neutral,<br>Monocation and Dication States | S17  |
|                   | PCM Model applied                                                                                     | S27  |
|                   | <b>N13 – N18</b>                                                                                      | S46  |
|                   | <b>N23</b> and Pancake Bonding                                                                        | S47  |
| 4.                | <u>Section 3. Additional Solution Phase EPR Spectra.</u>                                              | S52  |
| 5.                | <u>Section 3. Detailed Crystallographic information</u>                                               |      |
|                   | X-ray Crystallographic Structure determination on <b>A19</b>                                          | S53  |
|                   | X-ray Crystallographic Structure determination on <b>A20</b>                                          | S62  |
|                   | X-ray Crystallographic Structure determination on <b>A21</b>                                          | S69  |
|                   | X-ray Crystallographic Structure determination on <b>A22</b>                                          | S75  |
|                   | X-ray Crystallographic Structure determination on <b>[N23]BF4</b>                                     | S88  |
|                   | References for the crystallographic section                                                           | S97  |

## Chart S1 – Graphical Index to Compound Identities

|           |                                                                                   |                                                                                   |                                                                                    |                |                |                      |        |
|-----------|-----------------------------------------------------------------------------------|-----------------------------------------------------------------------------------|------------------------------------------------------------------------------------|----------------|----------------|----------------------|--------|
|           | 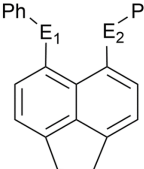 |  |  |                |                |                      |        |
|           | E <sub>1</sub>                                                                    | E <sub>2</sub>                                                                    | E <sub>1</sub>                                                                     | E <sub>2</sub> | E <sub>1</sub> | E <sub>2</sub>       |        |
| <b>A1</b> | S                                                                                 | S                                                                                 | <b>N7</b>                                                                          | S              | <b>N13</b>     | PhSe                 | Br     |
| <b>A2</b> | Se                                                                                | Se                                                                                | <b>N8</b>                                                                          | Se             | <b>N14</b>     | PhSe                 | I      |
| <b>A3</b> | Te                                                                                | Te                                                                                | <b>N9</b>                                                                          | Te             | <b>N15</b>     | PhTe                 | Br     |
| <b>A4</b> | S                                                                                 | Se                                                                                | <b>N10</b>                                                                         | S              | <b>N16</b>     | PhTe                 | I      |
| <b>A5</b> | S                                                                                 | Te                                                                                | <b>N11</b>                                                                         | S              | <b>N17</b>     | Ph <sub>2</sub> P(S) | PhSe   |
| <b>A6</b> | Se                                                                                | Te                                                                                | <b>N12</b>                                                                         | Se             | <b>N18</b>     | PhS(O)               | PhS(O) |

### Index of syntheses and crystal structures (with Refcodes, special notes, *dE*...E):

- A1** Aschenbach, *Dalton Trans.*, 2012 (incl. the Br and I analogs with ACEN of **15-18**). Xray WARKIL, AB Z'=2 3.274(4), 3.288(4).
- A2** L. K. Aschenbach, F. R. Knight, R. A. M. Randall, D. B. Cordes, A. Baggott, M. B. hl, A. M. Z. Slawin, J. D. Woollins, *Dalton Trans.* 2012, 41, 3141 – 3153. Xray WARKOR AB 3.1834(7)
- A3** Aschenbach, *Dalton*, 2012. Xray WARKUX AB 3.367(2)
- A4** Aschenbach, *Dalton*, 2012. Xray WARLAE AB 3.113(4)
- A5** Aschenbach, *Dalton*, 2012. Xray WARLEI AB 3.158(1)
- A6** Aschenbach, *Dalton*, 2012. Xray WARLIM AB 3.248(2)
- N7** Prepared by Nagy: P. Nagy, D. Szab\_, I. Kapovits, Kucsman, G. Argay, A. Klmn, *J. Mol. Struct.* 2002, 606, 61.\* Xray LUFCIY (P<sub>2</sub>/c) & LUFCIY01 (P<sub>2</sub><sub>1</sub>2<sub>1</sub>2<sub>1</sub>) both AB 3.0044(6); 3.021(2)
- N8** S. Hayashi, W. Nakanishi, *Bull. Chem. Soc. Jpn.* 2008, 81, 1605.; S. Hayashi, W. Nakanishi, A. Furuta, J. Drabowicz, T. Sasamori, N. Tokitoh, *New J. Chem.* 2009, 33, 196. Xray POPCON AB 3.135(1)
- N9** H.Fujihara, H.Ishitani, Y.Takaguchi, N.Furukawa, *Chem.Lett.* (1995), 571, doi:10.1246/cl.1995.571 \*\* Xray ZODNIP CCt 3.287 (2) (the torsion angles are +132.5, -124.8°)
- N10** F. R. Knight, A. L. Fuller, M. Buhl, A. M. Z. Slawin, J. D. Woollins, *Chem. Eur. J.* 2010, 16, 7503 –7516 Xray MUWVOQ (Pca<sub>2</sub>), MUWVOQ01 (P<sub>2</sub><sub>1</sub>2<sub>1</sub>2<sub>1</sub>) both AB 3.063(2); 3.030(1)
- N11** F. R. Knight, A. L. Fuller, M. Bühl, A. M. Z. Slawin, J. D. Woollins, *Chem. Eur. J.* 2010, 16, 7503 –7516. Xray MUWVUW AB Z'=2 3.098(1), 3.068(2)
- N12** F. R. Knight, A. L. Fuller, M. Bühl, A. M. Z. Slawin, J. D. Woollins, *Chem. Eur. J.* 2010, 16, 7503 –7516. Xray MUWWAD AB Z'=2 3.158(2), 3.192(2)
- N13** F. R. Knight, A. L. Fuller, M. Bühl, A. M. Z. Slawin, J. D. Woollins, *Chem. Eur. J.* 2010, 16, 7605 –7616. Xray CIKPUI B 3.1136(6) (but the torsion angle is 159.2°, so almost C).
- N14** F. R. Knight, *e.a.*, *Chem. Eur. J.* 2010, 16, 7605 –7616. Xray CUZDOR B 3.2524(8) (torsion 157°)
- N15** F. R. Knight, A. L. Fuller, M. Buhl, A. M. Z. Slawin, J. D. Woollins, *Chem. Eur. J.* 2010, 16, 7605 –7616. Xray CUZDUX B 3.191(1) (torsion is 160 deg, so borderline C,B)
- N16** F. R. Knight, *e.a.*, *Chem. Eur. J.* 2010, 16, 7605 –7616. Xray CUZFAF B 3.315(1) (torsion is 158.1, so C)
- N17** Knight, CEJ, 2010, 7617. Xray MUXGOC AAc 3.2803(9); *d*(centroid-plane) = 3.383; 3.518
- N18** Knight, CEJ, 2010, 7503. IP not given; estimated to be 9.16 eV from DeltaE thermal. Xray MUWWIL ACc 3.076(2) (torsion angles are 70.4 and 137.6°)

\* The RadCat-AlOR<sub>4</sub> salt is Zhang 2014 *JACS*.

\*\* N9<sup>2+</sup> prepared by these same authors but not structurally characterized.

Note that all these predominantly AB structures have the E substituents distorted towards *trans*. Never *cis*.

## Section 1. Voltammetry Data and Methods

### Solution electrochemical potentials for naphthalene and acenaphthene

Obtaining potentials for the parent polycyclic aromatics is not as easy as it seems. For the most common: naphthalene, anthracene etc., data are compiled in standard sources. For example, P. Vanysek, *Electrochemical Series* in Section 8, Analytical Chemistry, CRC Handbook of Chemistry and Physics, 85<sup>th</sup> Ed., D. R. Lide, Ed., CRC Press, Boca Raton, 2004. However, neither the method nor the medium is necessarily comparable to the experiments of interest. From the sources we have cited, the following results pertain:

| Compound                    | E <sup>red</sup> , V | Conditions                                                                       | E <sup>red</sup> , Fc <sup>+/0</sup> , V | E <sup>ox</sup> , V | Conditions                                                                  | E <sup>ox</sup> , Fc <sup>+/0</sup> , V | Ref. |
|-----------------------------|----------------------|----------------------------------------------------------------------------------|------------------------------------------|---------------------|-----------------------------------------------------------------------------|-----------------------------------------|------|
| Naphthalene                 | -2.50                | CH <sub>3</sub> CN SCE, DME<br>0.1 M 0.1 M<br>iPr <sub>4</sub> NClO <sub>4</sub> | -2.83                                    | +1.54               | CH <sub>3</sub> CN SCE, Pt RDE,<br>0.1 M iPr <sub>4</sub> NClO <sub>4</sub> | +1.16                                   | 1    |
| Naphthalene                 | -2.61                | CH <sub>3</sub> CN SCE                                                           | -2.99                                    | +1.72               | CH <sub>3</sub> CN SCE                                                      | +1.72                                   | 2    |
| Naphthalene                 | —                    | —                                                                                | —                                        | +1.65               | Acetone/water<br>Ag <sup>+</sup> /AgCl                                      | +1.47                                   | 3    |
| Naphthalene<br>(best est.)  |                      | CH <sub>2</sub> Cl <sub>2</sub>                                                  | -3.09                                    |                     | CH <sub>2</sub> Cl <sub>2</sub>                                             | +1.37                                   |      |
| Acenaphthene                | 0                    | —                                                                                | —                                        | +1.39               | Acetone/water<br>Ag <sup>+</sup> /AgCl                                      | +1.39                                   | 3    |
| Acenaphthene                | -2.83                | THF Ag wire                                                                      | -3.24                                    | —                   | —                                                                           | —                                       | Gray |
| Acenaphthene<br>(best est.) |                      | CH <sub>2</sub> Cl <sub>2</sub>                                                  | -3.34                                    |                     | CH <sub>2</sub> Cl <sub>2</sub>                                             | +1.11                                   |      |

\* Diff. of +0.1 V between CH<sub>2</sub>Cl<sub>2</sub> and CH<sub>3</sub>CN for the Fc<sup>+/0</sup> redox couple.

### Solution electrochemical potentials for Type I naphthalene[1,8-cd] (or acenaphthene[5,6-diyl]) dichalcogenoles, I (E = S, Se, Te)\* (compiled from the literature)<sup>5-12</sup>

|                   | Redox couples | S,S          | Se,Se | Te,Te |
|-------------------|---------------|--------------|-------|-------|
| Napthalene series | +2/+1         | 0.53         | 0.40  | 0.02  |
|                   | +1/+2         | 0.78         | 0.36  | -0.13 |
|                   | 0/-1          | -2.88/ -2.99 | 0.21  | 0.14  |
|                   | -1/-2         |              |       |       |
| Acenaphthenes     | +2/+1         | 0.68         | 0.87  | 0.24  |
|                   | +1/+2         | 0.42         | 0.53  | 0.12  |
|                   | 0/-1          | -3.24        | -1.36 | 0.22  |

\* Original data converted to the Fc<sup>+/0</sup> scale.

### References

1. A. Zweig and A. K. Hoffmann, *J. Org. Chem.*, 1965, **30**, 3997.
2. N. V. Vasilieva, I. G. Irtegorova, T. A. Vaganova and V. D. Shteingarts, *J. Phys. Org. Chem.* 2008, **21**, 73.
3. R. E. Sioda and B. Frankowska, *J. Electroanal. Chem.*, 2008, **612**, 147.
4. D. G. Gray, *An investigation of electroanalytical techniques applicable to electrolytic polymerizations*, PhD Thesis, 1968 (University of Manitoba, Canada).
5. H. Fujihara, M. Yabe, J.-J. Chiu and N. Furukawa, *Tetrahedron Lett.* 1991, **32**, 4345.
6. B. K. Teo, F. Wudl, J. H. Marshall and A. Krugger, *J. Am. Chem. Soc.*, 1977, **99**, 2349.
7. K. Bandyopadhyay, M. Sastry, V. Paul, and K. Vijayamohanan, *Langmuir*, 1997, **13**, 866.
8. T. Inamasu, D. Yoshitoku, Y. Sumi-otorii, H. Tani and N. Ono, *J. Electrochem. Soc.*, 2003, **150**, A128.

9. L. Zhang, S. M. Fakhouri, F. Liu, J. C. Timmons, N. A. Ran and A. L. Briseno, *J. Mater. Chem.*, 2011, **21**, 1329.
10. W. Ji, S. Jing, Z. Liu, J. Shen, J. Ma, D. Zhu, D. Cao, L. Zheng and M. Yao, *Inorg. Chem.*, 2013, **52**, 5786.
11. D. J. Press, T. G. Back, T. C. Sutherland, *Tetrahedron Lett.*, 2012, **53**, 1603.
12. T. Sarukawa and N. Oyama, *J. Electroanal. Chem.*, 2010, **647**, 204.
13. F. B. Bramwell, R. C. Haddon, F. Wudl, M. L. Kaplan, J. H. Marshall, *J. Am. Chem. Soc.*, 1978, **100**, 4612.

### Further details on voltammetry of the compounds A1 – N18

All compounds were sufficiently soluble in  $\text{CH}_2\text{Cl}_2$  to give clear to yellow-coloured solutions at analytical concentrations in 0.4 M  $[\text{nBu}_4\text{N}][\text{PF}_6]$ . In each case there were at least one, and up to three, oxidation processes evident and no reduction processes up to the solvent electrolyte limit ( $-2.4$  V). Similar behavior was seen for all eighteen compounds using both the glassy carbon (GC) and platinum (Pt) working electrodes. A representative CV trace is provided for each sample with the annotations employed in the Table 1 (main article). Exhaustive CVs exploring the full anodic and cathodic potential ranges, and the effect of increased scan rates up to 20 V/s have been undertaken. In addition, each compound and electrode was also investigated using Osteryoung Square Wave Voltammetry (SWV), which excels at resolving peaks that are closely overlapped. In those cases where the redox potentials are found too close to 0 V vs.  $\text{Fc}^{+/0}$ , cobaltocenium hexafluorophosphate was employed as an alternative standard, with the potentials recorded on the  $\text{Fc}^{+/0}$  scale using reliable conversion factors.

In the case of **A1** three oxidation processes were present. The first oxidation process displayed a moderately large return wave which did not grow with increasing scan rate (Figure S1). The second oxidation process was irreversible at scan rates below 10  $\text{V s}^{-1}$ . At scan rates of 10  $\text{V s}^{-1}$  or higher a minor return wave appeared. The third oxidation process was irreversible at all scan rates.

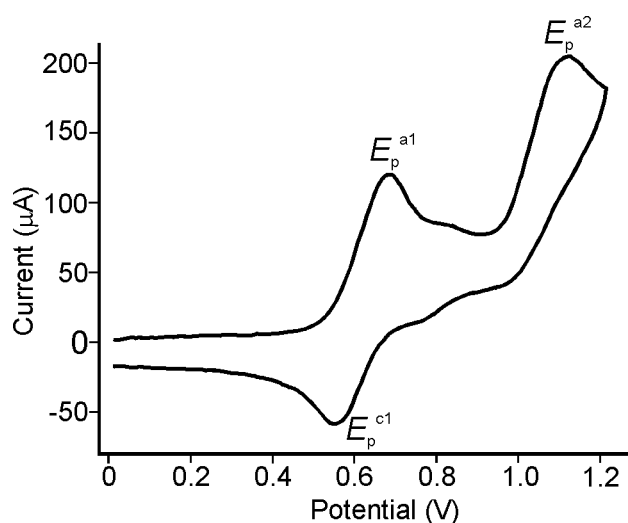

**Figure S1.** Cyclic voltammogram of a 5.4 mM solution of **A1** in  $\text{CH}_2\text{Cl}_2$  (0.4 M  $[\text{nBu}_4\text{N}][\text{PF}_6]$ ),  $\nu = 0.2$   $\text{V s}^{-1}$ ,  $T = 22.4$   $^\circ\text{C}$  on a GC electrode.

Compound **A2** also displayed three oxidation processes. The first oxidation process had a large return wave over all scan rates, the second had a moderate return wave which grew slightly in peak current height with increasing scan rate, and the third process was irreversible at all scan rates and close to the solvent electrolyte limit (Figure S2). The electrochemical response was the same for both samples (old and new) but the second oxidation appears a bit sharper in the new sample even though the actual distance  $E_p^{a1}$  to  $E_p^{a2}$  is the same for both (280 mV).

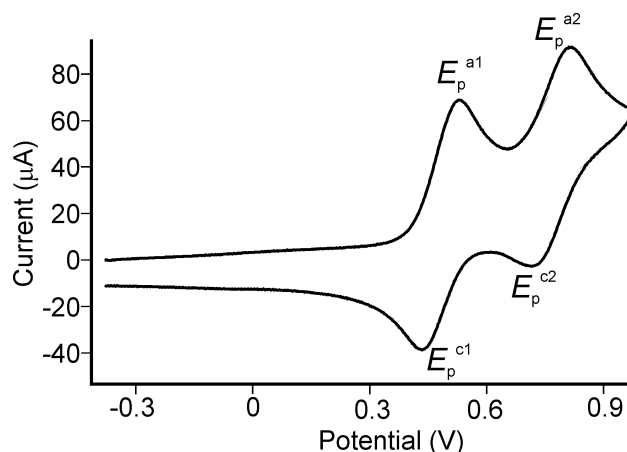

**Figure S2.** Cyclic voltammogram of a 2.7 mM solution of **A2** in  $\text{CH}_2\text{Cl}_2$  (0.4 M  $[\text{nBu}_4\text{N}][\text{PF}_6]$ ),  $\nu = 0.2 \text{ V s}^{-1}$ ,  $T = 21.9 \text{ }^\circ\text{C}$  on a GC electrode.

Compound **A3** also displayed three oxidation processes, but the first two oxidations were very closely spaced. The first oxidation process had a large return wave at slow scan rates which did not increase in peak current height with increasing scan rate. The second oxidation is only 170 mV away and displays a minor return wave at slow scan rates that increases slightly with increasing scan rate. The third oxidation is irreversible and occurs very close to the solvent limit. In the old sample the first two oxidation processes were only visible as minor humps in the CV, followed by a third oxidation process that was no longer visible in the new sample CV.

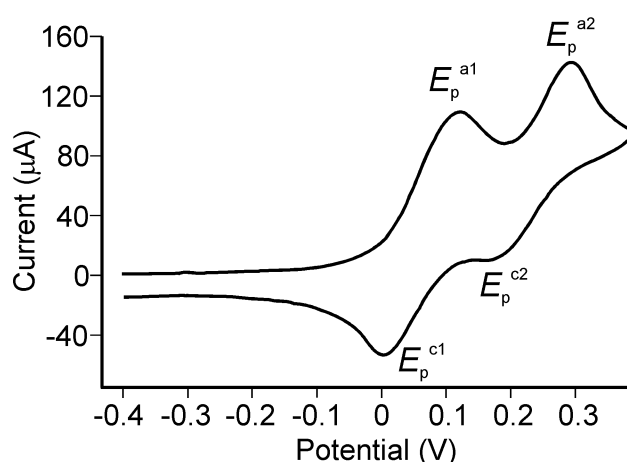

**Figure S3.** Cyclic voltammogram of a 5.5 mM solution of **A3** in  $\text{CH}_2\text{Cl}_2$  (0.4 M  $[\text{nBu}_4\text{N}][\text{PF}_6]$ ),  $\nu = 0.2 \text{ V s}^{-1}$ ,  $T = 21.8 \text{ }^\circ\text{C}$  on a GC electrode.

Compound **A4** also displayed three oxidation processes. The first oxidation process had a large return wave at all scan rates, and the second and third oxidation processes were both irreversible over all scan rates (up to  $10 \text{ V s}^{-1}$ ) (Figure 10S4). The only difference in the CV response between the old and new samples of **10** seems to be the shape of the second oxidation wave, which appears broader in the old sample but is still the same distance away from  $E_p^{a1}$ .

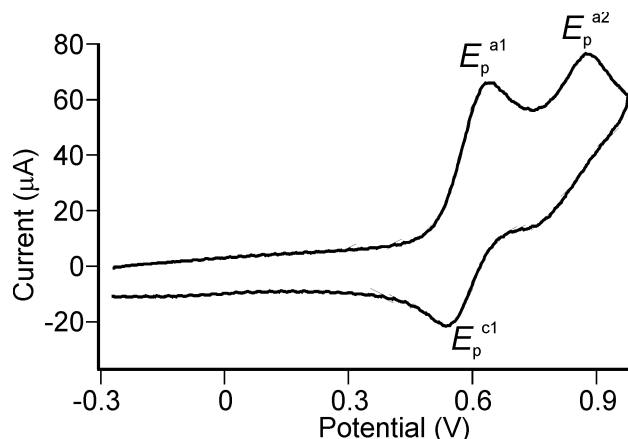

**Figure S4.** Cyclic voltammogram of a 2.0 mM solution of **A4** in  $\text{CH}_2\text{Cl}_2$  (0.4 M  $[\text{nBu}_4\text{N}][\text{PF}_6]$ ),  $\nu = 0.2 \text{ V s}^{-1}$ ,  $T = 22.5 \text{ }^\circ\text{C}$  on a GC electrode.

Compound **A5** displayed three oxidation processes (Figure S5). The first had a minor return wave which did not increase in current size with scan rate. The other two were irreversible up to  $10 \text{ V s}^{-1}$ .

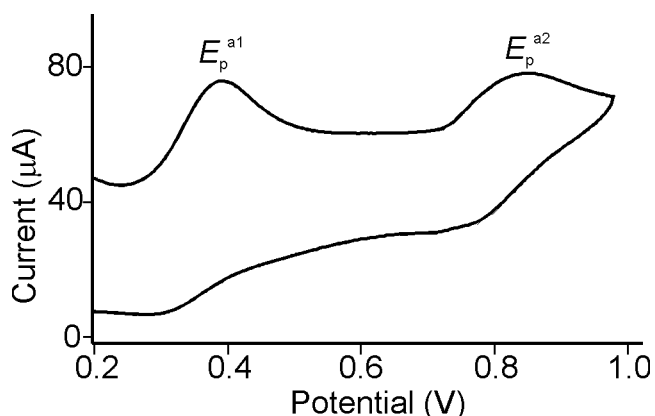

**Figure S5.** Cyclic voltammogram of a 2.2 mM solution of **A5** in  $\text{CH}_2\text{Cl}_2$  (0.4 M  $[\text{nBu}_4\text{N}][\text{PF}_6]$ ),  $\nu = 0.2 \text{ V s}^{-1}$ ,  $T = 21.0 \text{ }^\circ\text{C}$  on a GC electrode.

Compound **A6** shows three oxidation processes and the first two had small return waves which did not increase in size with increasing scan rate (Figure S6). Also, there were two offset return waves at  $-0.26 \text{ V}$  and  $-0.66 \text{ V}$  (not shown) likely stemming from the first two oxidation processes and suggesting that oxidation is causing decomposition of the molecule, which can then be re-reduced at more cathodic potentials.

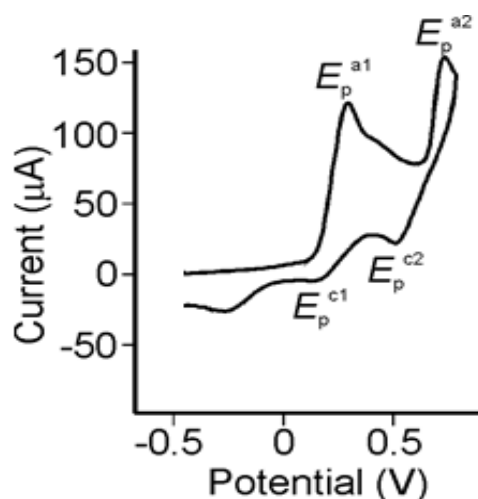

**Figure S6.** Cyclic voltammogram of a 6.1 mM solution of **A6** in  $\text{CH}_2\text{Cl}_2$  (0.4 M  $[\text{nBu}_4\text{N}][\text{PF}_6]$ ),  $\nu = 0.2 \text{ V s}^{-1}$ ,  $T = 20.7 \text{ }^\circ\text{C}$  on a GC electrode.

In the case of **N7** three oxidation processes were present. The first oxidation process displayed a moderately large return wave at all scan rates ( $I_p^{c1}/I_p^{a1} = 0.54$ ), which was closely followed by the second oxidation process which was irreversible at slow scan rates but became more chemically reversible (a return wave grew in) at scan rates of  $5 \text{ V s}^{-1}$  or faster (Figure S7). The third oxidation process was irreversible at all scan rates investigated.

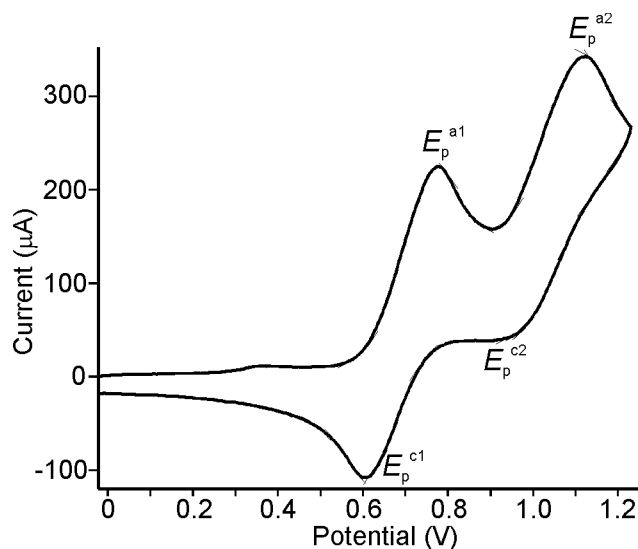

**Figure S7.** Cyclic voltammogram of a 10.2 mM solution of **N7** in  $\text{CH}_2\text{Cl}_2$  (0.4 M  $[\text{nBu}_4\text{N}][\text{PF}_6]$ ),  $\nu = 0.2 \text{ V s}^{-1}$ ,  $T = 22.5 \text{ }^\circ\text{C}$  on a GC electrode.

For **N8** similar behavior was seen. The first two oxidation processes displayed large return waves ( $I_p^{c1}/I_p^{a1} = 0.66$ ,  $I_p^{c2}/I_p^{a2} = 0.54$ ) at all scan rates investigated (Figure S8). The third oxidation was irreversible at all scan rates and did not result in a diminished return wave for either of the first two oxidation processes when the potential was swept through this process.

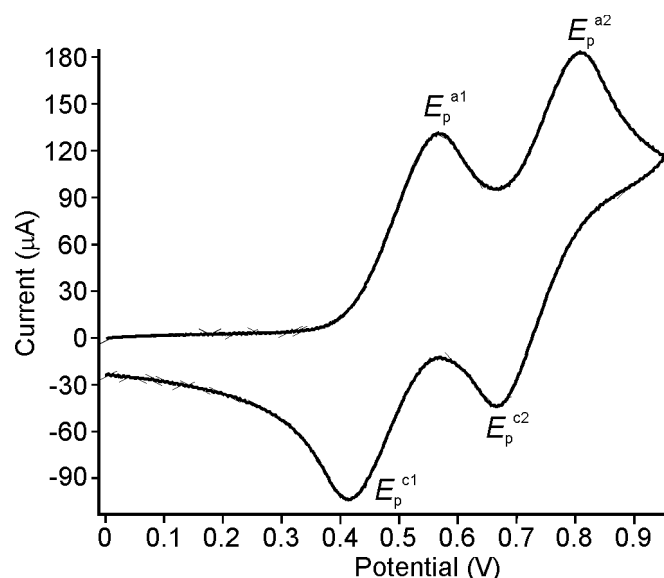

**Figure S8.** Cyclic voltammogram of a 6.6 mM solution of **N8** in  $\text{CH}_2\text{Cl}_2$  (0.4 M [ $n\text{Bu}_4\text{N}$ ][ $\text{PF}_6$ ]),  $\nu = 0.2 \text{ V s}^{-1}$ ,  $T = 22.0 \text{ }^\circ\text{C}$  on a GC electrode.

In the case of **N9**, two oxidation processes were observed which were very closely spaced (only 50 mV apart, Figure S9). There was a minor return wave which appears to be associated with the first oxidation (switching the potential before the second peak gives a return wave), which did not increase in peak current height with increasing scan rate. The second process was of higher peak current height and irreversible (no second return wave grew in with increasing scan rate).

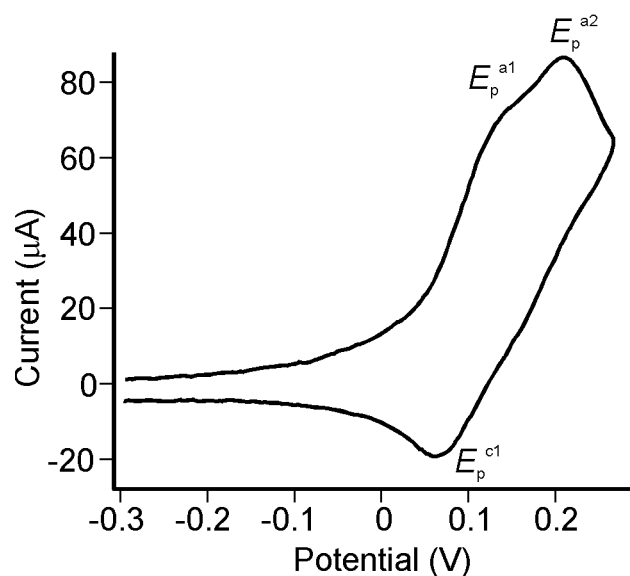

**Figure S9.** Cyclic voltammogram of a 3.0 mM solution of **N9** in  $\text{CH}_2\text{Cl}_2$  (0.4 M [ $n\text{Bu}_4\text{N}$ ][ $\text{PF}_6$ ]),  $\nu = 0.2 \text{ V s}^{-1}$ ,  $T = 21.8 \text{ }^\circ\text{C}$  on a GC electrode.

In the case of **N10**, three oxidation processes were seen, with the first two being very closely spaced (only 100 mV apart) (Figure S10). The first process had a moderate sized return wave which did not grow with increasing scan rate. The second and third processes were irreversible over all scan rates investigated.



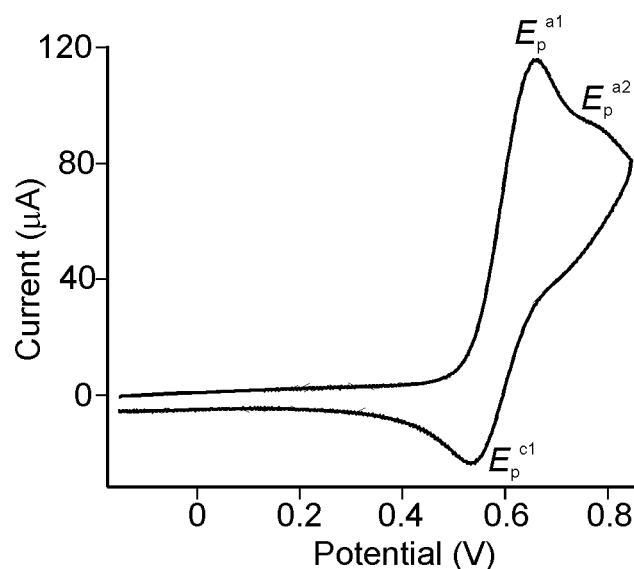

**Figure S10.** Cyclic voltammogram of a 3.7 mM solution of **N10** in  $\text{CH}_2\text{Cl}_2$  (0.4 M [ $^n\text{Bu}_4\text{N}$ ][ $\text{PF}_6$ ]),  $\nu = 0.2 \text{ V s}^{-1}$ ,  $T = 20.8 \text{ }^\circ\text{C}$  on a GC electrode.

For **N11**, three oxidation processes were again observed. The first oxidation process had a return wave that was offset and of slightly lower peak current height and the other two oxidations were irreversible over all scan rates (Figure S11). On Pt all three processes were irreversible at all scan rates.

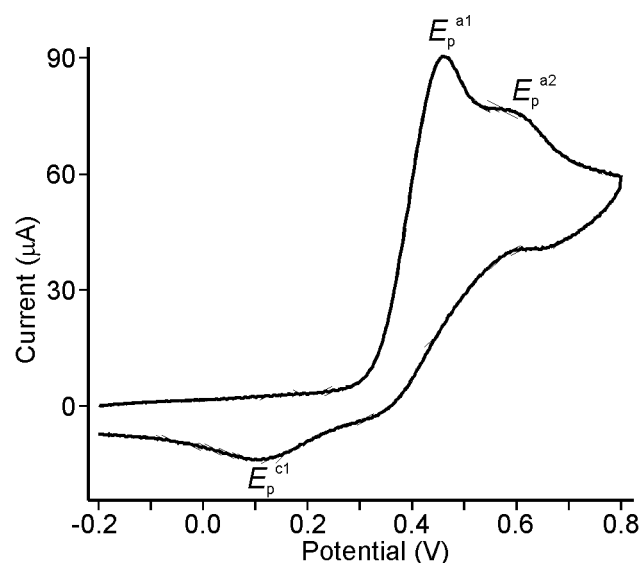

**Figure S11.** Cyclic voltammogram of a 3.8 mM solution of **N11** in  $\text{CH}_2\text{Cl}_2$  (0.4 M [ $^n\text{Bu}_4\text{N}$ ][ $\text{PF}_6$ ]),  $\nu = 0.2 \text{ V s}^{-1}$ ,  $T = 22.0 \text{ }^\circ\text{C}$  on a GC electrode.

In the case of **N12** three oxidations were observed with the first two being very close in potential. There was a minor, offset return wave for the first process and a very minor return wave for the second oxidation processes at slow scan rates ( $0.2 \text{ V s}^{-1}$ ). These did not grow in peak current height with increasing scan rate (Figure S12). The third oxidation process was irreversible at all scan rates investigated. All processes were irreversible on Pt at all scan rates.

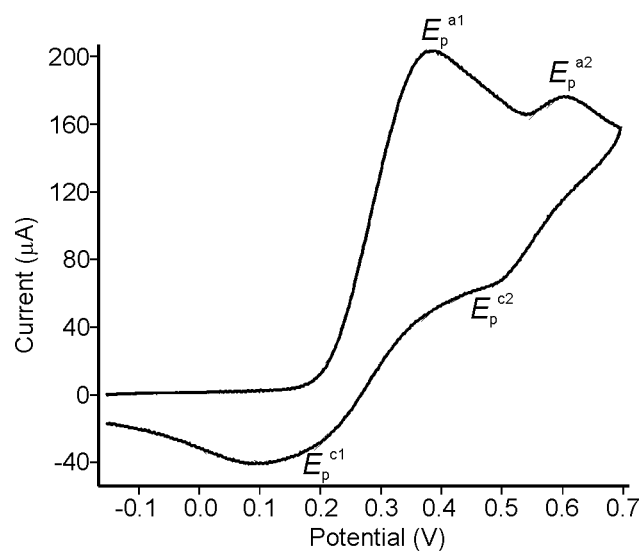

**Figure S12.** Cyclic voltammogram of an 8.1 mM solution of **N12** in  $\text{CH}_2\text{Cl}_2$  (0.4 M  $[\text{nBu}_4\text{N}][\text{PF}_6]$ ),  $\nu = 0.2 \text{ V s}^{-1}$ ,  $T = 21.4 \text{ }^\circ\text{C}$  on a GC electrode.

**N13** and **N14** displayed three oxidation processes. The first was a minor wave due to oxidation of the halogen (Bromine in **N13**, Figure S13 and Iodine in **N14**, Figure 9S14). The second process had a moderately large return wave and the third process was irreversible over all scan rates.

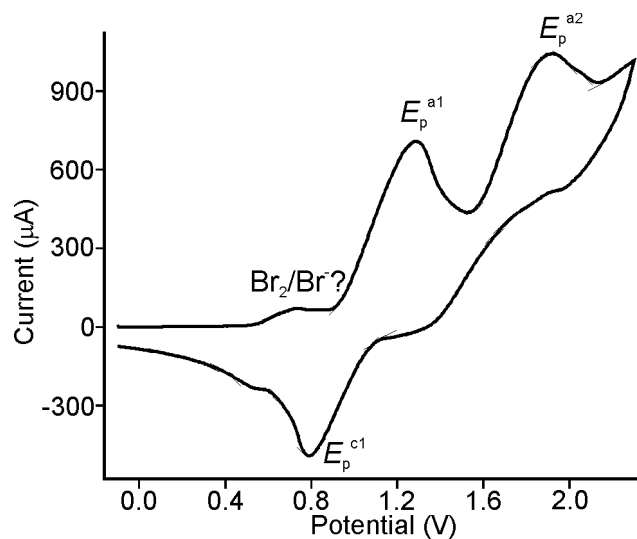

**Figure S13.** Cyclic voltammogram of a 42.4 mM solution of **N13** in  $\text{CH}_2\text{Cl}_2$  (0.4 M  $[\text{nBu}_4\text{N}][\text{PF}_6]$ ),  $\nu = 0.2 \text{ V s}^{-1}$ ,  $T = 22.5 \text{ }^\circ\text{C}$  on a GC electrode.

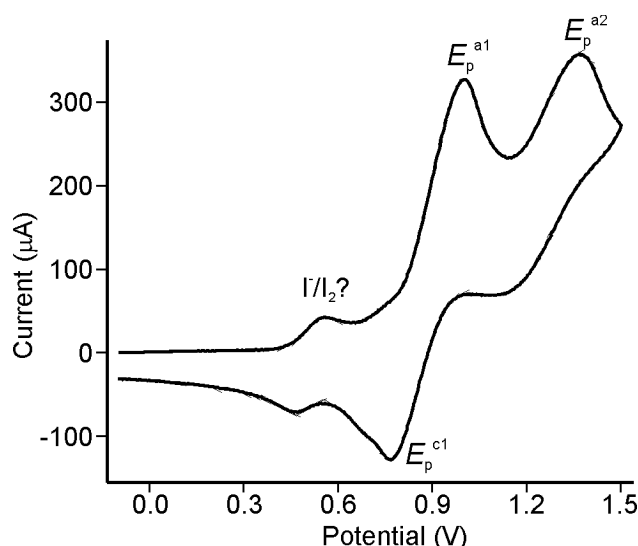

**Figure S14.** Cyclic voltammogram of a 12.1 mM solution of **N14** in  $\text{CH}_2\text{Cl}_2$  (0.4 M  $[\text{nBu}_4\text{N}][\text{PF}_6]$ ),  $\nu = 0.2 \text{ V s}^{-1}$ ,  $T = 22.9 \text{ }^\circ\text{C}$  on a GC electrode.

In the case of **N15** there are two irreversible oxidations which lie in close proximity of one another (Figure S15). These do not have return waves at any of the scan rates investigated.

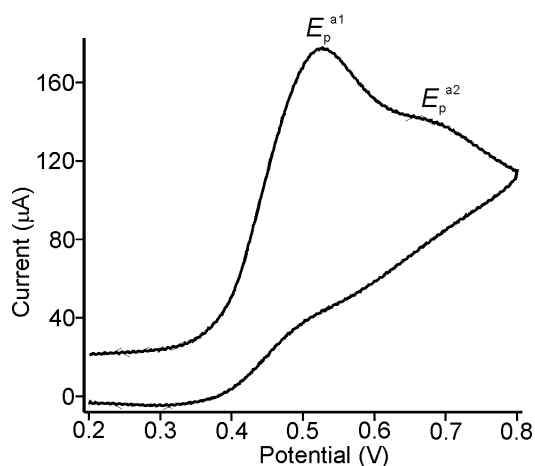

**Figure S15.** Cyclic voltammogram of a 5.3 mM solution of **N15** in  $\text{CH}_2\text{Cl}_2$  (0.4 M  $[\text{nBu}_4\text{N}][\text{PF}_6]$ ),  $\nu = 0.2 \text{ V s}^{-1}$ ,  $T = 21.5 \text{ }^\circ\text{C}$  on a GC electrode.

For **N16** the first oxidation process has a very minor return wave which only grows slightly in peak current height up to  $10 \text{ V s}^{-1}$  ( $I_p^{c1}/I_p^{a1} = 0.29$  at  $0.2 \text{ V s}^{-1}$  and  $0.43$  at  $10 \text{ V s}^{-1}$ ) (Figure S16). There is also a second return wave which appears at  $-0.34 \text{ V}$  and may originate from the reduction of an electrochemically generated oxidation product. The second oxidation is irreversible and minor in peak current height when compared with the first oxidation process.

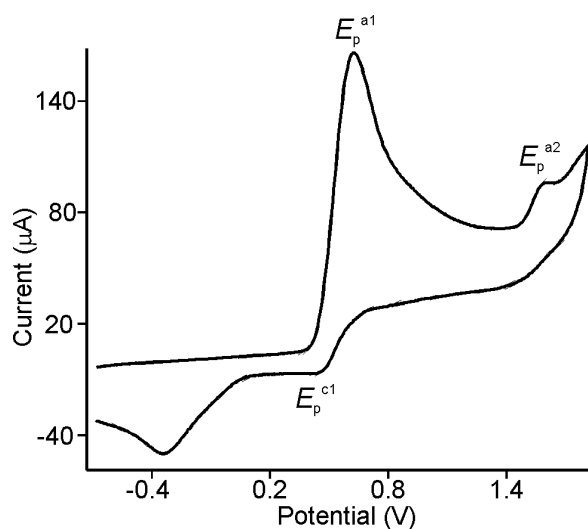

**Figure S16.** Cyclic voltammogram of a 6.1 mM solution of **N16** in  $\text{CH}_2\text{Cl}_2$  (0.4 M  $[\text{nBu}_4\text{N}][\text{PF}_6]$ ),  $\nu = 0.2 \text{ V s}^{-1}$ ,  $T = 22.7 \text{ }^\circ\text{C}$  on a GC electrode.

**N17** displayed two irreversible oxidation processes which were in very close proximity of each other causing the first oxidation to shoulder the second oxidation (Figure S17). On further anodic scanning, a third peak is detected and there are apparent return peaks for the first two oxidations.

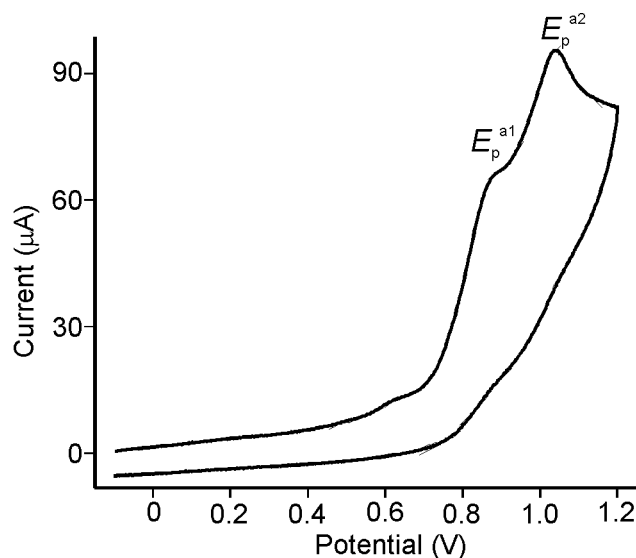

**Figure S17.** Cyclic voltammogram of a 4.1 mM solution of **N17** in  $\text{CH}_2\text{Cl}_2$  (0.4 M  $[\text{nBu}_4\text{N}][\text{PF}_6]$ ),  $\nu = 0.2 \text{ V s}^{-1}$ ,  $T = 21.6 \text{ }^\circ\text{C}$  on a GC electrode.

In the case of **N18** there again appear to be two very closely separated oxidation processes, and all are irreversible at all scan rates and appeared very close to the solvent electrolyte window limit (Figure S18). A possible reduction processes could be detected, with a fully IRR response.

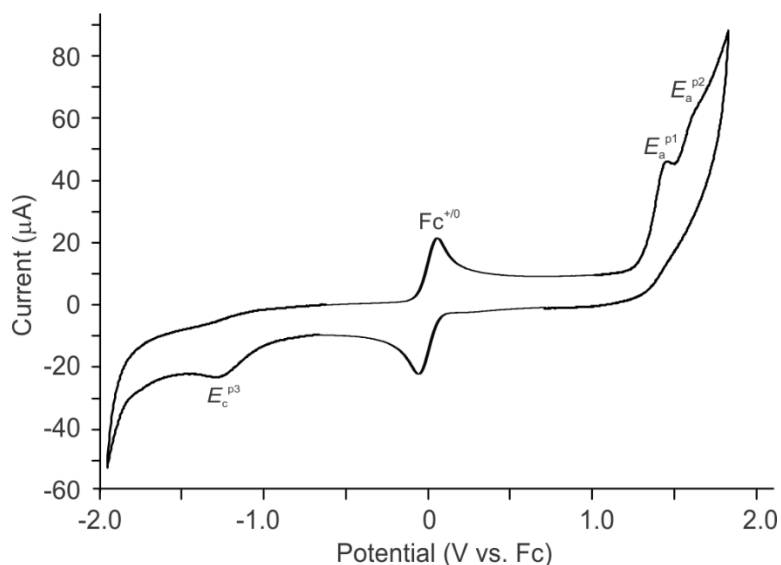

**Figure S18.** Cyclic voltammogram of a 4.1 mM solution of **N18**, plus included ferrocene internal standard, in  $\text{CH}_2\text{Cl}_2$  (0.4 M  $[\text{nBu}_4\text{N}][\text{PF}_6]$ ),  $\nu = 0.2 \text{ V s}^{-1}$ ,  $T = 21.6 \text{ }^\circ\text{C}$  on a GC electrode.

### Additional Voltammetry Data Analysis

Additional information such as comparison of voltammetry data obtained on Pt vs. GC solid interfacial electrodes is provided here.

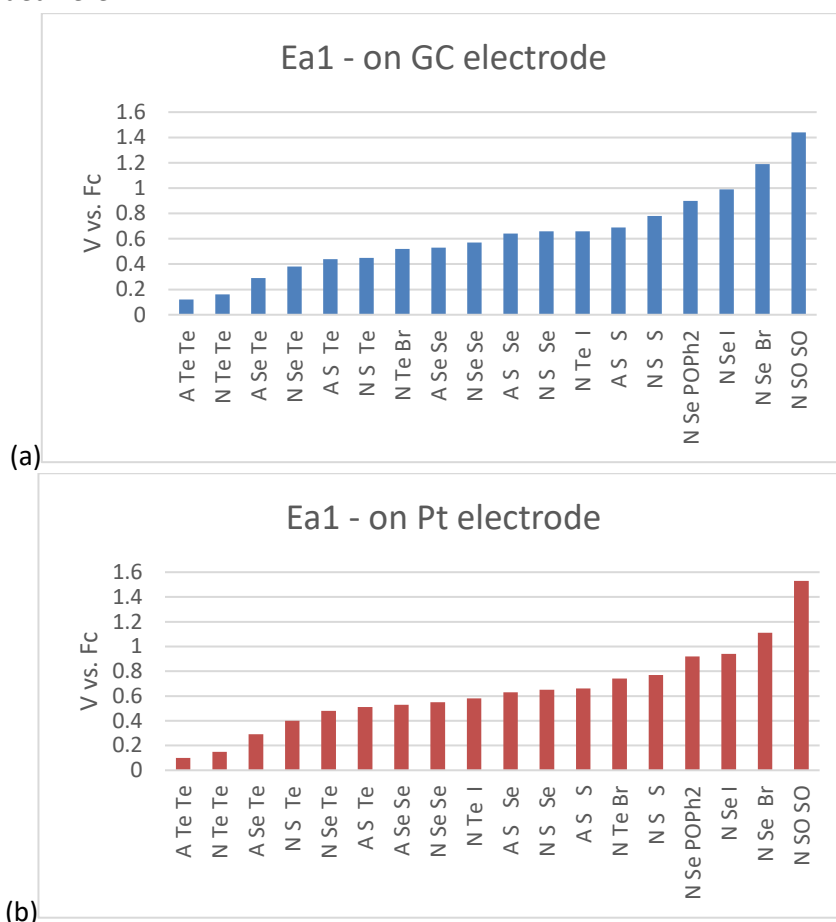

**Figure S19.** Bar graphs showing the large increase in  $E_p^{a1}$  values found for **1** – **12** as a function of E groups. (a) Measured at a GC electrode and (b) measured at a Pt electrode interface.

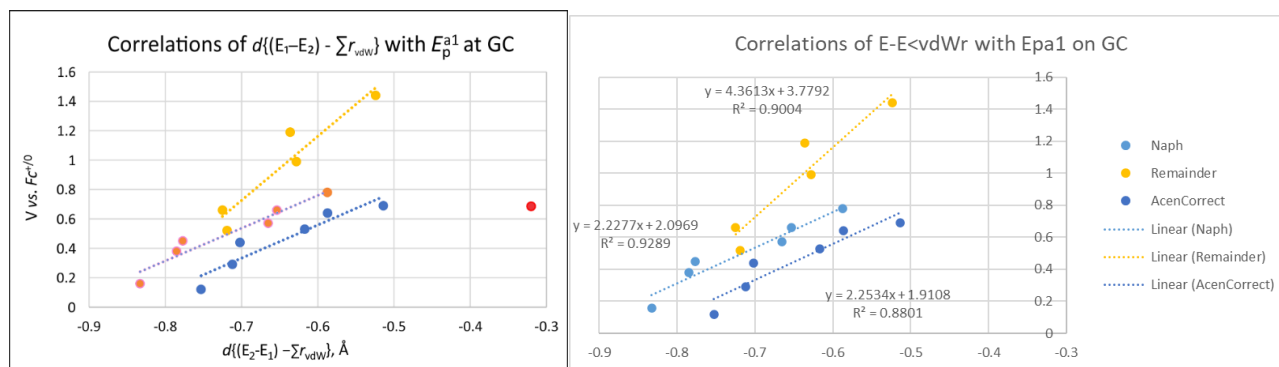

**Figure S20.** Correlation graphs comparing the  $E_p^{a1}$  values with  $\{d(E_1-E_2)-\sum(r_{vdW})\}$  measured at GC (left) and Pt (right) electrodes. For the GC graph, the **A1-6** (blue dots) and **N7-12** (orange dots) series data are plotted separately, as are also the data for **N13 – N17** (yellow dots). No suitable E–E distance could be defined for **N18**. The red dot indicates the coordinates for **A1** from crystallography (see text). Linear fits for **A1-6**  $y = 2.25x + 1.91$ ,  $R^2 = 0.88$ ; **N7-12**  $y = 2.23x + 2.10$ ,  $R^2 = 0.93$ ; **N13-17**  $y = 4.36x + 3.78$ ,  $R^2 = 0.90$ .

For the twelve dichalcogenides (**A1 – N12**) in oxidation state +2 where  $E_1$  and  $E_2$  are S, Se or Te, six results are available for each of the 1,8-naphthalene and 5,6-acenaphthene series. In a search for a causation of the trends in  $E_p^{a1}$  values, consideration was given to the analyses previously performed on the divergent geometries of neutral **A1 – N12**.<sup>59,62</sup> The published crystal structures for this series were consulted, and the amount by which the E⋯E distances are *less than* the sums of the van der Waals radii of two atoms was used as a proxy for the degree of *peri* interaction (and hence of HOMO destabilization). In Fig. S20, correlations of the  $E_p^{a1}$  values with these distances are shown, which demonstrates that each half-dozen of samples show a different linear correlation (with the exception of **N18**, for which no suitable E–E distance could be defined).

Good linear correlations are found for the two *peri*-dichalcogen series **A2-6** and **N7-12**, which have very similar slopes of 2.25 and 2.23 V/Å, respectively (GC; see the ESI for the similar results at Pt) but different intercepts. The coordinates of compound **A1** are worthy of note; if the  $d(S\cdots S)$  value from the crystal structure is used, as is the case for the other eleven compounds, the point indicated by the red dot in Fig. S20 is obtained, which does not fit the correlation. However, as Aschenbach *et al.* have shown, the crystal lattice of this compound contains a conformation “AA $t$ ” that is different from the others acenaphthenes designated “AB” (see Scheme 1 and definitions below).<sup>59</sup> These authors investigated the structural anomaly using a density functional theory (DFT) computational approach, concluding that the ground state of **A1** is the “AB” conformation, and that the observed crystal structure is a higher energy conformation that is probably induced by lattice packing forces. An estimated value of  $d(S\cdots S)$  in the AB conformation, obtained by subtracting 0.05 Å from the computed distance to allow for typical DFT vs. crystallographic lengths, gives the coordinates used for the orange dot in the graphs in Fig. S20. Hence, the correlation between  $d(E\cdots E)$  and  $E_p^{a1}$  fits on the assumption, that in solution, all twelve compounds have the same conformations with a defined *peri* interaction between a (perpendicular)  $E_1$  l.p. donor orbital and a (parallel)  $E_2$   $\sigma^*_{C-E}$  acceptor orbital. Moreover, the positions of the *mixed chalcogen* data points along these correlation lines clearly demonstrates that it is the cooperative interaction between E’s that determines the measured values of  $E_p^{a1}$  for the whole series.

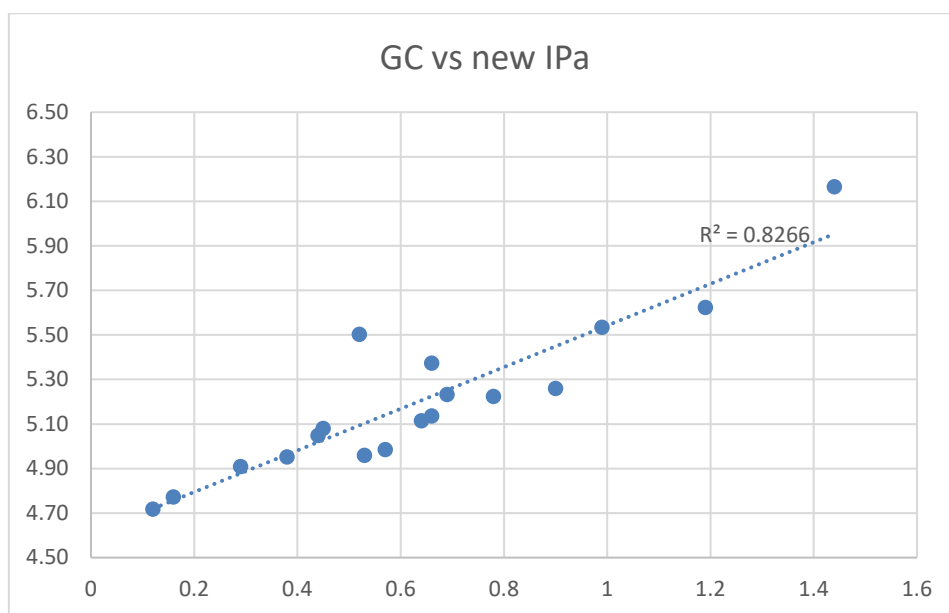

**Figure S21.** Correlation graph comparing the  $E_p^{a1}$  values at a GC electrode with DFT computed adiabatic first ionisation energies, relating the energies of neutral and monocationic **A1 – N18**.

## Experimental Section for Voltammetry

**Reagents and General Procedures.** Dichloromethane (BDH, reagent grade) was purified by distillation from CaH<sub>2</sub> and purged with dry argon prior to use. Electrochemical grade tetrabutylammonium hexafluorophosphate [<sup>n</sup>Bu<sub>4</sub>N][PF<sub>6</sub>] (Fluka) was used as the supporting electrolyte and was stored in a desiccator. Ferrocene (Fc) was sublimed prior to use.

**Voltammetry.** Cyclic voltammograms (CV) were obtained at 21 ± 2°C in CH<sub>2</sub>Cl<sub>2</sub> containing 0.4 M [<sup>n</sup>Bu<sub>4</sub>N][PF<sub>6</sub>] as the supporting electrolyte. Solutions were purged with dry argon for 10 min directly before use and were kept under a blanket of argon during all experiments. CV measurements were performed with a Princeton Applied Research PARSTAT 2273 potentiostat. The voltammetry cell has been described previously.<sup>1</sup> Initial background scans characterized the size of the accessible electrochemical window and provided an estimate of the likely background current. The CVs were obtained over scan rates of 0.1 – 10 V s<sup>-1</sup>. Potentials for compounds **A1** – **N18** are reported versus the operative formal potential,  $E^{0/}$  for the Fc<sup>0/+</sup> redox couple, which was used as an internal standard. The working electrodes were either a 3.0 mm BASi glassy carbon (GC) or a 1.6 mm BASi platinum (Pt), and these were polished with an Al<sub>2</sub>O<sub>3</sub> (Buehler, 0.05 μm) slurry on a clean polishing cloth, rinsed with distilled water, and dried with tissue paper prior to use. All compounds were fairly soluble in CH<sub>2</sub>Cl<sub>2</sub> to give clear to yellow colored solutions. In the case of **N7-N11** there were three oxidation processes evident and no reduction processes up to the solvent electrolyte limit (-2.4 V). In the case of **N12** there is an additional irreversible reduction process which occurs at -1.8 V (vs. Fc<sup>0/+</sup>). Similar responses were seen for all six compounds using both the glassy carbon (GC) and platinum (Pt) working electrodes.

| Comp,      | Neutral Confor.  | Monocat. Confor. | Dication Confor. | First I.P. (e.V.) | Second I.P. (e.V.) |
|------------|------------------|------------------|------------------|-------------------|--------------------|
| <b>A1</b>  | AAt              | AAc              | CCc              | 5.23              | 6.30               |
| <b>A2</b>  | ABc              | AAc              | AAc              | 4.96              | 6.06               |
| <b>A3</b>  | ABt              | AAc              | AAc              | 4.72              | 5.62               |
| <b>A4</b>  | ABc              | AAc              | AAc              | 5.12              | 6.23               |
| <b>A5</b>  | ABt              | AAc              | AAc              | 5.05              | 6.03               |
| <b>A6</b>  | AB               | AAc              | AAc              | 4.91              | 5.84               |
| <b>N7</b>  | ACc              | AAc              | AAc              | 5.22              | 6.36               |
| <b>N8</b>  | ABt              | AAc              | AAc              | 4.99              | 6.03               |
| <b>N9</b>  | ABt              | AAc              | AAc              | 4.77              | 5.61               |
| <b>N10</b> | ABt              | AAc              | AAc              | 5.14              | 6.20               |
| <b>N11</b> | ABt              | AAc              | AAc              | 5.08              | 5.50               |
| <b>N12</b> | ABt              | AAc              | AAc              | 4.95              | 5.83               |
| <b>N13</b> | Bt               | Ct               | Ct               | 5.64              | 6.89               |
| <b>N14</b> | Bt               | At               | C                | 5.53              | 6.77               |
| <b>N15</b> | Bt               | Ct               | C                | 5.50              | 6.79               |
| <b>N16</b> | Bt               | At               | A                | 5.37              | 6.56               |
| <b>N17</b> | AAc <sup>b</sup> | AAc <sup>b</sup> | AAc <sup>b</sup> | 5.26              | 5.56               |
| <b>N18</b> | AAc              | AAt              | AAt <sup>c</sup> | 6.173             | 5.96               |
| <b>N23</b> | Flat             | Flat             | Flat             |                   |                    |



## Section 2: Quantum (DFT) Computations

### Exhaustive Search of Conformational Space for Compounds in Neutral, Monocation and Dication States

A wide range of geometries were optimised for both monocationic and dicationic dichalcogen diphenyl derivatives (Fig. S22.) in the gas phase at the B3LYP<sup>1</sup> with use of Curtis and Binning's 962(d) basis set<sup>2</sup> on Se and the Stuttgart-Dresden effective core potential<sup>3</sup> applied to Te. For tellurium the relevant double zeta basis set was applied with the modification of d-polarisation functions with exponents of 0.237<sup>4</sup> whilst the 6-31+G(d) basis set was applied to all other atoms (carbon, hydrogen and sulfur).

A key point of interest in exploring these systems was to observe, if any, the generation of bonding character between the chalcogen atoms upon oxidation with the expectation that monocation species may show a hemibond whilst the dications could exhibit full chalcogen-chalcogen bonding. To assess this, Wiberg bond indices<sup>5</sup> were obtained by means of natural bond analysis<sup>6</sup> at the same computational level and, coupled with chalcogen-chalcogen distances, provided a reasonable means to consider the nature of any bonds.

The search over compounds **N7** – **N12** will be presented first. Similar calculations have been reported previously for **A1** – **A6** in the ESI for our Communication [<https://doi.org/10.1002/cphc.201300678>].

Geometry optimisations were performed on a number of different starting structures. Where available, previously optimised neutral species were used as a starting point and, otherwise, initial geometries were generated by hand. Such a methodology was performed for both the monocation and dication species in order to determine that all energy minima had been found. Uncovering the likely global minima allowed for calculation of the adiabatic ionisation potential whilst single point calculations were performed to obtain the vertical ionisation potential. The former was taken as being the difference between the most stable geometric conformer of the higher oxidation state and the most stable geometric conformer of the lower oxidation state. Vertical ionisation potential involved calculation of the energy of a dication with the geometry of a stable monocation conformer. The energy associated with the stable monocation of the requisite geometry was then subtracted from the excited dication energy.

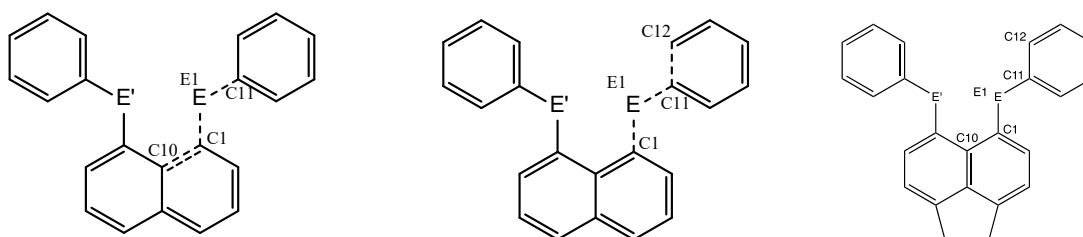

**Figure S22:** General structure of the species studied computationally where E = Chalcogen. The nature of E was varied between S, Se and Te. Also shown are the prominent dihedrals recorded (dashed bonds), respectively,  $\theta$  (left) and  $\gamma$ . C<sub>12</sub> and its counterpart C<sub>18</sub> were always taken as being the atom furthest from the naphthalene ring.

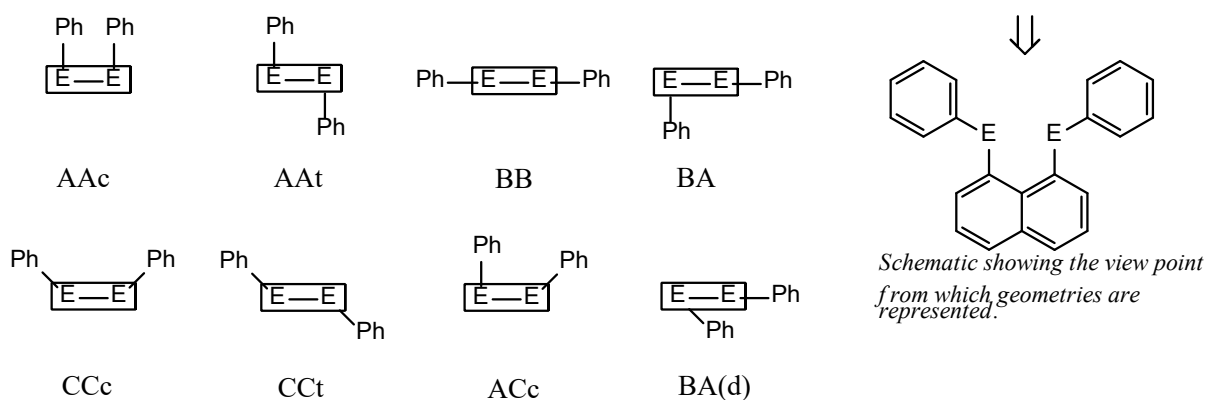

**Figure S23:** Representative geometries of the mono- and dication compounds investigated. Note that the rectangular box symbolises a “side-on” view of the naphthalene ring system.

As shown in Fig S23, a wide range of optimised geometries were found in the course of this study. Species which are denoted with “c” have both of the phenyl groups which are bound to the chalcogen atoms in a cis arrangement with respect to the naphthalene ring and those which are labelled “t” have the aromatic rings in a trans orientation. In order for a species to be classified as CC the  $C_{11}-E_1-E'_2$  angle was required to fall within  $120^\circ$  to  $165^\circ$ . If these conditions were not met, the system was labelled as an A or B geometry. In general, it was found that interchangeability between the AA and CC based conformers was relatively facile aside from a small number of exceptions. The ACT, BA(d) and BB conformers were noted as being rare within the spectrum of systems examined and also energetically less favourable than either their AA or CC counterparts. All computations were performed using the Gaussian 03 suite of programs<sup>7</sup> whilst molecular orbitals were visualized using the VMD program<sup>8</sup> and Molden<sup>9</sup> was employed for following the shape of structures after each iteration.

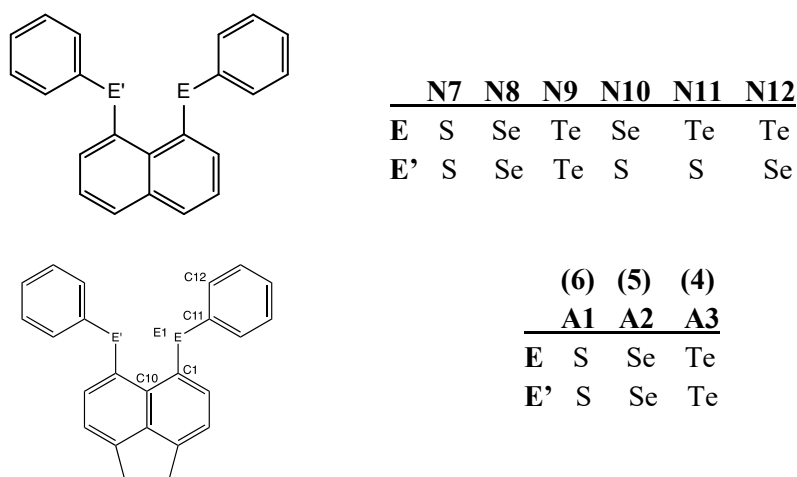

**Figure S24.** Labelling scheme for monocations and dications in the two diPhE series of *peri*-substituted compounds..

## Results

Proceeding results are labelled such that they are consistent with the descriptions provided for geometry in Figs S22 and S23 while chemical composition is outlined in Fig S24. Only geometries which were found to be energetic minima are presented.

**Table S1:** Selected optimised parameters, WBIs and relative energies of monocations of naphthalene derivatives **N7-N12** (B3LYP level).

| <b>Compound</b>                            | <b>N7 AAt</b> | <b>N7 CCc</b> |              |
|--------------------------------------------|---------------|---------------|--------------|
| EPh,E'Ph                                   | SPh, SPh      | SPh, SPh      |              |
| Energy (Hartree)                           | -1644.13676   | -1644.13786   |              |
| Energy (kJ/mol)                            | -4316681.07   | -4316683.95   |              |
| Energy (rel)* / kJ/mol                     | 2.88          | 0             |              |
| E(1)···E(2)                                | 2.8628        | 2.9395        |              |
| WBI E(1)···E(2)                            | 0.1127        | 0.0781        |              |
| E(1)-C(1)                                  | 1.7942        | 1.7792        |              |
| E(2)-C(9)                                  | 1.7943        | 1.7792        |              |
| C(10)-C(1)-E(1)-C(11); $\theta 1 / ^\circ$ | 100.290       | 140.181       |              |
| C(10)-C(9)-E(2)-C(17); $\theta 2 / ^\circ$ | 100.441       | -140.182      |              |
| C(1)-E(1)-C(11)-C(12); $\gamma 1 / ^\circ$ | 166.929       | 143.003       |              |
| C(9)-E(2)-C(17)-C(18); $\gamma 2 / ^\circ$ | 166.809       | -143.009      |              |
| <b>Compound</b>                            | <b>N8 AAc</b> | <b>N8 AAt</b> |              |
| EPh,E'Ph                                   | SePh,SePh     | SePh, SePh    |              |
| Energy (Hartree)                           | -5650.46167   | -5650.46269   |              |
| Energy (kJ/mol)                            | -14835287.11  | -14835289.81  |              |
| Energy (rel)* / kJ/mol                     | 2.69          | 0             |              |
| E(1)···E(2)                                | 3.0285        | 2.9946        |              |
| WBI E(1)···E(2)                            | 0.1558        | 0.1706        |              |
| E(1)-C(1)                                  | 1.9385        | 1.9385        |              |
| E(2)-C(9)                                  | 1.9388        | 1.9385        |              |
| C(10)-C(1)-E(1)-C(11); $\theta 1 / ^\circ$ | 110.099       | 95.523        |              |
| C(10)-C(9)-E(2)-C(17); $\theta 2 / ^\circ$ | -105.029      | 95.537        |              |
| C(1)-E(1)-C(11)-C(12); $\gamma 1 / ^\circ$ | 166.950       | 168.944       |              |
| C(9)-E(2)-C(17)-C(18); $\gamma 2 / ^\circ$ | -170.447      | 168.937       |              |
| <b>Compound</b>                            | <b>N9 AAc</b> | <b>N9 AAt</b> | <b>N9 BB</b> |
| EPh,E'Ph                                   | TePh, TePh    | TePh, TePh    | TePh, TePh   |
| Energy (Hartree)                           | -863.90680    | -863.90888    | -863.89743   |
| Energy (kJ/mol)                            | -2268187.31   | -2268192.77   | -2268162.70  |
| Energy (rel)* / kJ/mol                     | 5.46          | 0             | 30.07        |
| E(1)···E(2)                                | 3.2991        | 3.2596        | 3.2772       |
| WBI E(1)···E(2)                            | 0.1886        | 0.1990        | 0.1127       |
| E(1)-C(1)                                  | 2.1357        | 2.1346        | 2.1290       |
| E(2)-C(9)                                  | 2.1350        | 2.1346        | 2.1288       |
| C(10)-C(1)-E(1)-C(11); $\theta 1 / ^\circ$ | 97.049        | 89.735        | 178.537      |
| C(10)-C(9)-E(2)-C(17); $\theta 2 / ^\circ$ | -104.661      | 89.774        | -178.588     |
| C(1)-E(1)-C(11)-C(12); $\gamma 1 / ^\circ$ | 175.974       | 167.992       | -91.344      |
| C(9)-E(2)-C(17)-C(18); $\gamma 2 / ^\circ$ | -174.960      | 167.973       | 91.357       |

| Compound                                   | N10 AAt     | N10 CCc     |
|--------------------------------------------|-------------|-------------|
| EPh,E'Ph                                   | SePh, SPh   | SePh, SPh   |
| Energy (Hartree)                           | -3647.29995 | -3647.29950 |
| Energy (kJ/mol)                            | -9575986.03 | -9575984.83 |
| Energy (rel)* / kJ/mol                     | 0           | 1.19        |
| E(1)··E(2)                                 | 2.9258      | 2.9838      |
| WBI E(1)··E(2)                             | 0.1511      | 0.1022      |
| E(1)-C(1)                                  | 1.9361      | 1.9330      |
| E(2)-C(9)                                  | 1.7961      | 1.7801      |
| C(10)-C(1)-E(1)-C(11); $\theta_1 / ^\circ$ | 92.947      | 133.285     |
| C(10)-C(9)-E(2)-C(17); $\theta_2 / ^\circ$ | 104.269     | -135.780    |
| C(1)-E(1)-C(11)-C(12); $\gamma_1 / ^\circ$ | 171.327     | 147.333     |
| C(9)-E(2)-C(17)-C(18); $\gamma_2 / ^\circ$ | 162.208     | -145.973    |

| Compound                                   | N11 AAc     | N11 AAt     | N11 CCc     |
|--------------------------------------------|-------------|-------------|-------------|
| EPh,E'Ph                                   | TePh, SPh   | TePh, SPh   | TePh, SPh   |
| Energy (Hartree)                           | -1254.02294 | -1254.02422 | -1254.02329 |
| Energy (kJ/mol)                            | -3292437.23 | -3292440.60 | -3292438.14 |
| Energy (rel)* / kJ/mol                     | 3.38        | 0           | 2.47        |
| E(1)··E(2)                                 | 3.0721      | 3.0374      | 3.0562      |
| WBI E(1)··E(2)                             | 0.1461      | 0.1596      | 0.1152      |
| E(1)-C(1)                                  | 2.1304      | 2.1275      | 2.1276      |
| E(2)-C(9)                                  | 1.7949      | 1.7976      | 1.7825      |
| C(10)-C(1)-E(1)-C(11); $\theta_1 / ^\circ$ | 106.113     | 86.333      | 135.839     |
| C(10)-C(9)-E(2)-C(17); $\theta_2 / ^\circ$ | -177.238    | 102.860     | -133.656    |
| C(1)-E(1)-C(11)-C(12); $\gamma_1 / ^\circ$ | 171.918     | 176.638     | 146.539     |
| C(9)-E(2)-C(17)-C(18); $\gamma_2 / ^\circ$ | -156.853    | 158.513     | -144.816    |

| Compound                                   | N12 AAc     | N12 AAt     |
|--------------------------------------------|-------------|-------------|
| EPh,E'Ph                                   | TePh, SePh  | TePh, SePh  |
| Energy (Hartree)                           | -3257.18489 | -3257.18653 |
| Energy (kJ/mol)                            | -8551738.92 | -8551743.23 |
| Energy (rel)* / kJ/mol                     | 4.31        | 0           |
| E(1)··E(2)                                 | 3.1543      | 3.1187      |
| WBI E(1)··E(2)                             | 0.1711      | 0.1820      |
| E(1)-C(1)                                  | 2.1317      | 2.1308      |
| E(2)-C(9)                                  | 1.9414      | 1.9406      |
| C(10)-C(1)-E(1)-C(11); $\theta_1 / ^\circ$ | 102.635     | -87.832     |
| C(10)-C(9)-E(2)-C(17); $\theta_2 / ^\circ$ | -104.202    | -95.590     |
| C(1)-E(1)-C(11)-C(12); $\gamma_1 / ^\circ$ | 177.124     | -173.280    |
| C(9)-E(2)-C(17)-C(18); $\gamma_2 / ^\circ$ | -166.732    | -165.440    |

Distances in Å, angles in degrees, energy values as specified.

**Table S2:** Adiabatic ionisation potentials (electron volts) of neutral species to monocations. Only the lowest energy conformers of the varying chemical compositions were considered and these are listed under “Geometry Neutral” and “Geometry Monocation”.

| Species | Geometry Neutral | Geometry Monocation | Adiabatic I.P. (eV) |
|---------|------------------|---------------------|---------------------|
| N7      | AB               | CCc                 | 6.553               |
| N8      | CCt              | AAt                 | 6.394               |
| N9      | CCt              | AAt                 | 6.214               |
| N10     | BA               | AAt                 | 6.531               |
| N11     | BA               | AAt                 | 6.484               |
| N12     | BA               | AAt                 | 6.360               |

**Table S3:** Selected optimised parameters, WBIs and relative energies of dications of naphthalene derivatives N7-N12 (B3LYP level).

| <b>Compound</b>                            | <b>N7 AAt</b>  | <b>N7 ACc</b>  | <b>N7 BA(d)</b> | <b>N7 CCc</b> |
|--------------------------------------------|----------------|----------------|-----------------|---------------|
| EPh,E'Ph                                   | SPh, SPh       | SPh, SPh       | SPh, SPh        | SPh, SPh      |
| Energy (Hartree)                           | -1643.75719    | -1643.75752    | -1643.74442     | -1643.76591   |
| Energy (kJ/mol)                            | -4315684.50    | -4315685.36    | -4315650.98     | -4315707.39   |
| Energy (rel)* / kJ/mol                     | 22.89          | 22.03          | 56.41           | 0.00          |
| E(1)···E(2)                                | 2.4963         | 2.6647         | 3.2260          | 2.8072        |
| WBI E(1)···E(2)                            | 0.5013         | 0.3537         | 0.1340          | 0.2415        |
| E(1)-C(1)                                  | 1.7938         | 1.7792         | 1.7460          | 1.7600        |
| E(2)-C(9)                                  | 1.7938         | 1.7757         | 1.7616          | 1.7600        |
| C(10)-C(1)-E(1)-C(11); $\theta_1 / ^\circ$ | -106.416       | -85.615        | 174.155         | 139.778       |
| C(10)-C(9)-E(2)-C(17); $\theta_2 / ^\circ$ | -106.967       | -127.181       | -41.749         | -139.766      |
| C(1)-E(1)-C(11)-C(12); $\gamma_1 / ^\circ$ | -160.881       | -170.476       | 131.626         | 150.023       |
| C(9)-E(2)-C(17)-C(18); $\gamma_2 / ^\circ$ | -160.712       | -155.384       | 162.299         | -150.061      |
| <b>Compound</b>                            | <b>N8 AAt</b>  | <b>N8 CCc</b>  |                 |               |
| EPh,E'Ph                                   | SePh, SePh     | SePh, SePh     |                 |               |
| Energy (Hartree)                           | -5650.09478    | -5650.09493    |                 |               |
| Energy (kJ/mol)                            | -14834323.84   | -14834324.24   |                 |               |
| Energy (rel)* / kJ/mol                     | 0.40           | 0.00           |                 |               |
| E(1)···E(2)                                | 2.6117         | 2.7945         |                 |               |
| WBI E(1)···E(2)                            | 0.6459         | 0.4497         |                 |               |
| E(1)-C(1)                                  | 1.9390         | 1.9195         |                 |               |
| E(2)-C(9)                                  | 1.9390         | 1.9195         |                 |               |
| C(10)-C(1)-E(1)-C(11); $\theta_1 / ^\circ$ | -100.930       | 126.360        |                 |               |
| C(10)-C(9)-E(2)-C(17); $\theta_2 / ^\circ$ | -100.914       | -126.340       |                 |               |
| C(1)-E(1)-C(11)-C(12); $\gamma_1 / ^\circ$ | -162.043       | 156.713        |                 |               |
| C(9)-E(2)-C(17)-C(18); $\gamma_2 / ^\circ$ | -162.075       | -156.730       |                 |               |
| <b>Compound</b>                            | <b>N9 AAc</b>  | <b>N9 AAt</b>  |                 |               |
| EPh,E'Ph                                   | TePh, TePh     | TePh, TePh     |                 |               |
| Energy (Hartree)                           | -863.55282     | -863.55525     |                 |               |
| Energy (kJ/mol)                            | -2267257.93    | -2267264.32    |                 |               |
| Energy (rel)* / kJ/mol                     | 6.39           | 0.00           |                 |               |
| E(1)···E(2)                                | 2.9337         | 2.8938         |                 |               |
| WBI E(1)···E(2)                            | 0.7083         | 0.7577         |                 |               |
| E(1)-C(1)                                  | 2.1273         | 2.1293         |                 |               |
| E(2)-C(9)                                  | 2.1281         | 2.1293         |                 |               |
| C(10)-C(1)-E(1)-C(11); $\theta_1 / ^\circ$ | 111.539        | 95.546         |                 |               |
| C(10)-C(9)-E(2)-C(17); $\theta_2 / ^\circ$ | -106.303       | 95.555         |                 |               |
| C(1)-E(1)-C(11)-C(12); $\gamma_1 / ^\circ$ | 163.058        | 163.322        |                 |               |
| C(9)-E(2)-C(17)-C(18); $\gamma_2 / ^\circ$ | -164.976       | 163.291        |                 |               |
| <b>Compound</b>                            | <b>N10 AAt</b> | <b>N10 CCc</b> |                 |               |
| EPh,E'Ph                                   | SePh, SPh      | SePh, SPh      |                 |               |
| Energy (Hartree)                           | -3646.92620    | -3646.93008    |                 |               |
| Energy (kJ/mol)                            | -9575004.74    | -9575014.93    |                 |               |
| Energy (rel)* / kJ/mol                     | 10.19          | 0.00           |                 |               |
| E(1)···E(2)                                | 2.5548         | 2.8247         |                 |               |
| WBI E(1)···E(2)                            | 0.5617         | 0.3145         |                 |               |
| E(1)-C(1)                                  | 1.9309         | 1.9086         |                 |               |
| E(2)-C(9)                                  | 1.7988         | 1.7650         |                 |               |
| C(10)-C(1)-E(1)-C(11); $\theta_1 / ^\circ$ | -96.737        | 133.546        |                 |               |
| C(10)-C(9)-E(2)-C(17); $\theta_2 / ^\circ$ | -112.033       | -138.272       |                 |               |
| C(1)-E(1)-C(11)-C(12); $\gamma_1 / ^\circ$ | -165.548       | 154.502        |                 |               |
| C(9)-E(2)-C(17)-C(18); $\gamma_2 / ^\circ$ | -156.505       | -149.823       |                 |               |
| <b>Compound</b>                            | <b>N11 AAt</b> | <b>N11 CCc</b> |                 |               |
| EPh,E'Ph                                   | TePh, SPh      | TePh, SPh      |                 |               |
| Energy (Hartree)                           | -1253.65689    | -1253.65719    |                 |               |
| Energy (kJ/mol)                            | -3291476.15    | -3291476.97    |                 |               |
| Energy (rel)* / kJ/mol                     | 0.81           | 0.00           |                 |               |

|                                            |         |          |
|--------------------------------------------|---------|----------|
| E(1)···E(2)                                | 2.6650  | 2.8675   |
| WBI E(1)···E(2)                            | 0.6134  | 0.4131   |
| E(1)-C(1)                                  | 2.1141  | 2.1044   |
| E(2)-C(9)                                  | 1.8066  | 1.7756   |
| C(10)-C(1)-E(1)-C(11); $\theta 1 / ^\circ$ | 92.610  | 123.815  |
| C(10)-C(9)-E(2)-C(17); $\theta 2 / ^\circ$ | 108.372 | -138.846 |
| C(1)-E(1)-C(11)-C(12); $\gamma 1 / ^\circ$ | 168.745 | 160.575  |
| C(9)-E(2)-C(17)-C(18); $\gamma 2 / ^\circ$ | 153.237 | -148.240 |

| Compound                                   | N12 AAc     | N12 AAt     |
|--------------------------------------------|-------------|-------------|
| EPH,E'Ph                                   | TePh, SePh  | TePh, SePh  |
| Energy (Hartree)                           | -3256.82390 | -3256.82557 |
| Energy (kJ/mol)                            | -8550791.16 | -8550795.54 |
| Energy (rel)* / kJ/mol                     | 4.38        | 0.00        |
| E(1)···E(2)                                | 2.8122      | 2.7431      |
| WBI E(1)···E(2)                            | 0.6178      | 0.6975      |
| E(1)-C(1)                                  | 2.1184      | 2.1215      |
| E(2)-C(9)                                  | 1.9385      | 1.9461      |
| C(10)-C(1)-E(1)-C(11); $\theta 1 / ^\circ$ | 109.360     | -95.488     |
| C(10)-C(9)-E(2)-C(17); $\theta 2 / ^\circ$ | -119.250    | -100.862    |
| C(1)-E(1)-C(11)-C(12); $\gamma 1 / ^\circ$ | 165.161     | -165.852    |
| C(9)-E(2)-C(17)-C(18); $\gamma 2 / ^\circ$ | -156.981    | -158.832    |

Distances in Å, angles in degrees, energy values as specified.

**Table S4:** Adiabatic ionisation potentials (electron volts) of monocation species to dications. Only the lowest energy conformers of the varying chemical compositions were considered and these are listed under “Geometry Neutral” and “Geometry Monocation”.

| Species | Geometry Monocation | Geometry Dication | Adiabatic I.P. (eV) |
|---------|---------------------|-------------------|---------------------|
| N7      | CCc                 | CCc               | 10.121              |
| N8      | AAAt                | CCc               | 10.007              |
| N9      | AAAt                | AAAt              | 9.619               |
| N10     | AAAt                | CCc               | 10.065              |
| N11     | AAAt                | AAAt              | 9.987               |
| N12     | AAAt                | AAAt              | 9.822               |

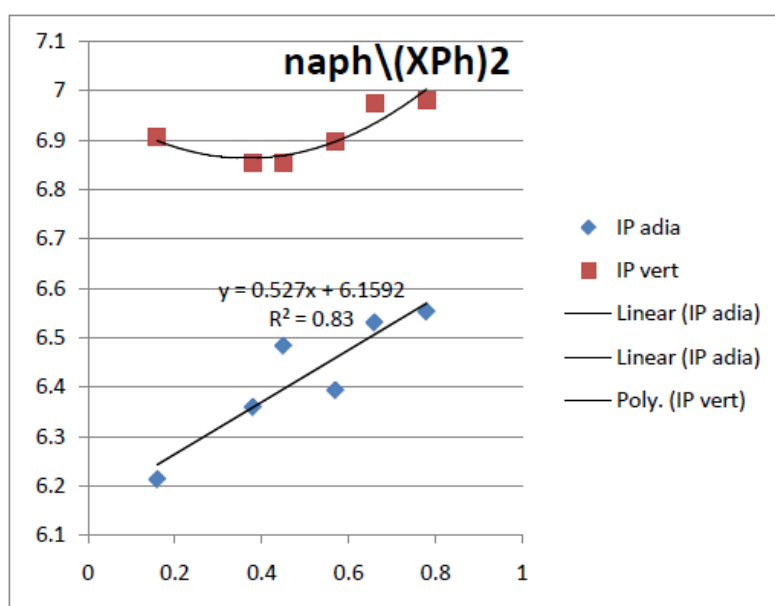

**Figure S25.** Correlations of  $E_{pa1}$  from solution voltammetry with Vertical and Adiabatic IPs, demonstrating the parabolic behaviour of the correlation for VIP versus approximately linear fits to the AIP.

**Table S5:** Vertical ionisation potentials of all geometries associated with a local energy minima for neutral and monocation species. The vertical ionisation involved for neutral species involves formation of a monocation with no subsequent relaxation. Similarly, for the monocations, vertical ionisation involves the removal of an additional electron from monocation geometry with no relaxation.

| Compound | Neutral Geometry | V. IP (eV) | Monocation Geometry | V. IP (eV) |
|----------|------------------|------------|---------------------|------------|
| N7       | AAt              | 6.908      | AAt                 | 10.588     |
|          | AB               | 6.982      | CCc                 | 10.223     |
|          | CCt              | 6.872      |                     |            |
| N8       | AAt              | 6.839      | AAc                 | 11.183     |
|          | AB               | 6.687      | AAt                 | 10.337     |
|          | CCt              | 6.896      |                     |            |
| N9       | CCc              | 6.699      | AAc                 | 9.953      |
|          | CCt              | 6.906      | AAt                 | 9.986      |
|          |                  |            | BB                  | 10.295     |
| N10      | AAt              | 6.817      | CCc                 | 10.177     |
|          | BA               | 6.975      | AAt                 | 10.451     |
|          |                  |            | AAt                 | 10.301     |
| N11      | BA               | 6.854      | AAc                 | 10.195     |
|          |                  |            | CCc                 | 10.142     |
| N12      | BA               | 6.853      | AAc                 | 10.125     |
|          |                  |            | AAt                 | 10.169     |

V. IP = Vertical ionisation potential.

## Discussion

Compared with the chalcogen – chalcogen distances observed for the neutral species, this distance decreases after both the initial and secondary oxidation event. Additionally, the Wiberg bond index (WBI) increases between the two chalcogens as oxidation occurs. As presented within the results section, the first oxidation occurs with greater ease than the second for all systems and the heavier chalcogens prove easier to remove an electron from in terms of the adiabatic ionisation potential (Tab S2. and Tab S4.). This is in-line with expectations given the more diffuse nature of the highest energy level of an atom down a periodic group.

Furthermore, as larger chalcogen atoms are placed in the peri position, the preference for geometries which support a higher WBI and smaller interchalcogen distance increases. Since the chalcogens are held in relatively inflexible positions due to the rigid structure of the naphthalene ring this is thought to be due to a greater orbital overlap which may allow the formation of bonds or hemibonds with greater ease.

## Sulfur-Sulfur

Within the neutral geometry, the N7 systems show a relatively weak preference for the AB conformer relative to CCt (+0.69 kJ/mol) and AAt (+5.93 kJ/mol). The large interchalcogen distance of 3.05 to 3.25 Å coupled with low WBI values of less than 0.05 suggest that there is little bonding character between the sulfur atoms. It is interesting to note that within the neutral N7 species the AAt geometry shows the lowest bonding character as per the previously mentioned parameters.

Following the first oxidation event, the AB geometry which was previously the most stable conformer now appears to exist at a local energy maxima and only AAt and CCc were found from a range of starting geometries. For N7<sup>1+</sup>, CCc presents the most stable conformer though this has a lower bonding character (Tab. S1) relative to AAt. This first oxidation event is not predicted to form a hemibond within the

gaseous species at the level of theory employed and, as shown in the results section, the WBI for these systems is relatively low; 0.1127 for AAt and 0.0781 for CCc.

Removing a further electron again decreases the bond length between atoms (Tab. S3) though now the CCc conformer is heavily favoured, even over AAt (WBI of 0.5013; peri – S-S distance of 2.4963) which would be expected to present a hemibond. Two other geometries were found for  $N7^{2+}$ , namely ACc and BA(d). ACc presents a conformer which is approximately the same energy as AAt (within 1 kJ/mol) though shows a lower bonding character. The BA(d) geometry has both the lowest WBI, longest S-S distance and the highest relative energy, likely stemming from steric repulsion between the phenyls which would be increased within this geometry.

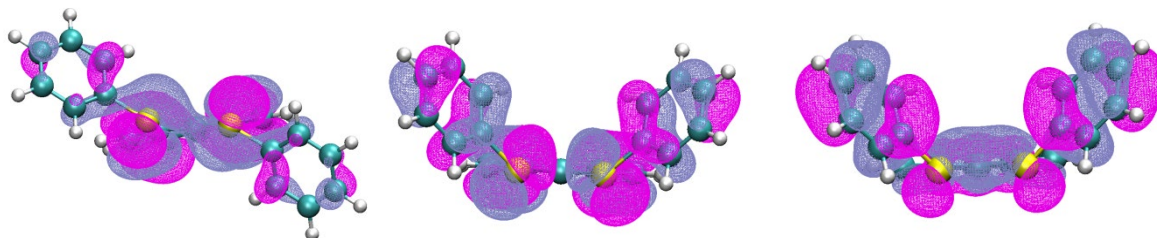

**Figure S26:** Molecular orbital diagrams of the HOMO (or SOMO) of the most stable  $N7$  conformers from neutral (left) to dication (right). A chalcogen-chalcogen interaction appears to be present at the HOMO for  $N7^{2+}$ .

Past the neutral oxidation state, sulfur shows a preference for CCc which grows in line with increasing positive charge on the  $N7$  species.

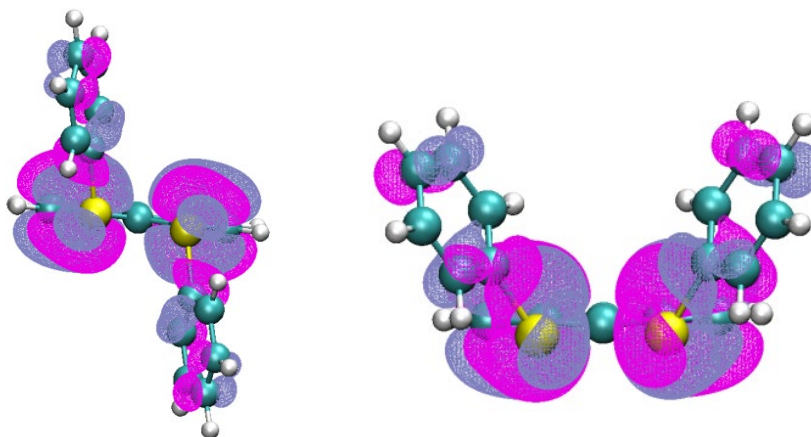

**Figure S27:** HOMOs of the two  $N8^{2+}$  geometries – AAt (left) and CCc. The CCc conformer is preferred by 0.40 kJ/mol at the applied level of theory though shows less bonding character between the selenium atoms.

### Selenium-Selenium

As a neutral molecule, this system shows a strong favorance for CCt with the AAt geometry resting 15.18 kJ/mol higher in energy. Upon oxidation, AAt becomes slightly favoured (Tab 1.) and this is postulated to be prominently due to minimising repulsion between the  $\pi$  clouds of the phenyl rings (compared with AAc) coupled with a slight increase in bonding character between the chalcogens. The data collected for the dicationic  $N8$  species (Tab 3.) surprisingly suggests a greater conformational preference for CCc by 0.40 kJ/mol over AAt even though the former has a lower bonding character and AAt may also be considered to minimize phenyl-phenyl steric repulsion to the same extent as CCc.



## Tellurium-Tellurium

The geometric preferences of the Te-Te systems (**N9**) are dictated at both studied oxidation states by the attainment of greater bonding between the two chalcogen atoms. For the neutral systems though, CCt is 3.25 kJ/mol more favourable compared with the CCc conformer though this appears to be due to reduced steric repulsion between the phenyl rings rather than any increased bonding character with the WBI of these two conformers showing a negligible difference of 0.009.

Oxidising the **N9** species is predicted to favour the AAt geometry which also provides the greatest bonding character in terms of Te-Te distance and WBI. Geometry optimisations also uncovered the relatively unusual BB conformer which was only found for the Te-Te monocation systems. This peculiar geometry was found to be considerably higher in energy (~ 30 kJ/mol) than either AAc or AAt and also presented a markedly different SOMO (Figure S28).

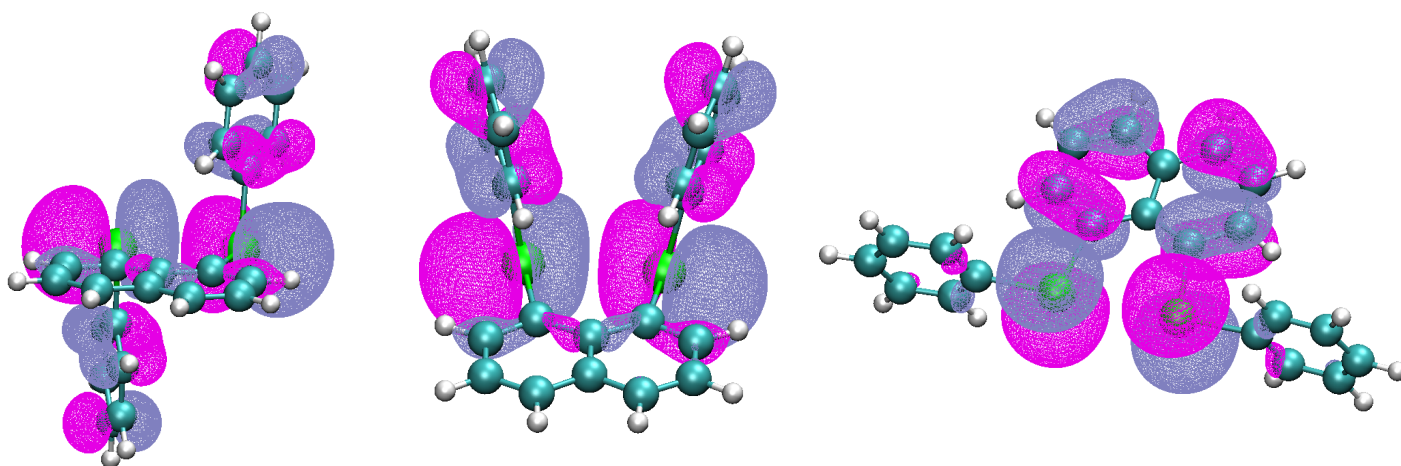

**Figure S28:** SOMOs of the **N9**<sup>1+</sup> conformers, viewpoints taken so as to express the differences between AAc (left), AAt (centre) and BB (right). The BB conformer, which is less favoured (+30 kJ/mol), exhibits electron density on the naphthalene whereas electron density at this level in AAt and AAc is concentrated on the phenyl rings.

**N9**<sup>2+</sup> shows a favorance for AAt over AAc and this appears to be due to decreased steric repulsion between the phenyl groups in addition to an increased bonding character between the tellurium atoms (Table 3.). Indeed, both of these oxidised geometries would be expected to display a full bond between the chalcogens. A WBI of 0.7577 is recorded for the preferred AAt conformer and a Te-Te distance which is 30% smaller than the sum of the VdW radii is also observed.

## Mixed Species

The mixed compounds (**N10**, **N11** and **N12**) show values which are intermediate between those of the two identical chalcogen systems in question. Thus, **N10**, presents characteristics between **N7** and **N8** whilst **N12** displays attributes which are a mix of **N8** and **N9** in terms of WBI and interchalcogen (E··E') distances. The neutral mixed compounds all show preference for the BA geometry and the monocations are all most stable in the AAt geometry.

For the dications, **N10**<sup>2+</sup> shows a considerably more stable CCc geometry compared with other conformers found to rest within energy minima (Table S3.) and this is likely guided by the sulfur atom as **N7**<sup>2+</sup> dications

show a considerably more stable CCc geometry. The preference of  $\text{N10}^{2+}$  for CCc over AAt (10.19 kJ/mol) is just under half the relative stability of these conformers in the  $\text{N7}^{2+}$  systems and selenium has been shown to have a slim inclination as to the geometry it will adopt which further adheres to the notion that  $\text{N10}^{2+}$  geometry is confirmed primarily by sulfur. For  $\text{N11}^{2+}$ , again, CCc is advanced as the more stable conformer by DFT calculations though now the relative difference over AAt is diminished compared with  $\text{N10}^{2+}$ . This is likely due to sulfur's CCc directing ability in dications being opposed by the strong desire of tellurium to obtain bonding at this oxidation level. A conclusion such as this is supported by AAt exhibiting a considerably larger WBI over CCc (0.6134 against 0.4131 respectively) in addition to the former having an interchalcogen distance which is lower by 0.2 Å.

Finally,  $\text{N12}^{2+}$  shows a likening towards AAt with tellurium directing towards the conformer which can support greater bonding character (Tab 3.). A preference of 4.38 kJ/mol over AAc is observed and this smaller value compared with relative energies for  $\text{N9}^{2+}$  is potentially due to poorer orbital overlap between tellurium and selenium in contrast to the Te-Te overlap.

## References for this initial part of the Computational Section

1. A. D. Becke, *J. Chem. Phys.*, 1993, **98**, 5648-5652; C. Lee, W. Yang and R. G. Parr, *Phys. Rev. B*, 1988, **37**, 785-789.
2. R. C. Binning and L. A. Curtiss, *J. Comput. Chem.*, 1990, **11**, 1206-1216.
3. M. Dolq, H. Stoll, H. Preuss and R.M Pitzer, *J. Phys. Chem.*, 1993, **97**, 5852
4. S. Huzinaga, J. Anzelm, M. Klobukowski, E. Radzio-Andzelm, Y. Sakai and H. Tatewaki, in: *Gaussian Basis Sets for Molecular Calculations*, Elsevier, Amsterdam, 1984.
5. K. B. Wiberg, *Tetrahedron*, 1968, **24**, 1083-1096.
6. A. E. Reed, L. A. Curtiss and F. Weinhold, *Chem. Rev.*, 1998, **88**, 899-926.
7. M. J. Frisch, G. W. Trucks, H. B. Schlegel, G. E. Scuseria, M. A. Robb, J. R. Cheeseman, J. A. Montgomery, Jr., T. Vreven, K. N. Kudin, J. C. Burant, J. M. Millam, S. S. Iyengar, J. Tomasi, V. Barone, B. Mennucci, M. Cossi, G. Scalmani, N. Rega, G. A. Petersson, H. Nakatsuji, M. Hada, M. Ehara, K. Toyota, R. Fukuda, J. Hasegawa, M. Ishida, T. Nakajima, Y. Honda, O. Kitao, H. Nakai, M. Klene, X. Li, J. E. Knox, H. P. Hratchian, J. B. Cross, V. Bakken, C. Adamo, J. Jaramillo, R. Gomperts, R. E. Stratmann, O. Yazyev, A. J. Austin, R. Cammi, C. Pomelli, J. W. Ochterski, P. Y. Ayala, K. Morokuma, G. A. Voth, P. Salvador, J. J. Dannenberg, V. G. Zakrzewski, S. Dapprich, A. D. Daniels, M. C. Strain, O. Farkas, D. K. Malick, A. D. Rabuck, K. Raghavachari, J. B. Foresman, J. V. Ortiz, Q. Cui, A. G. Baboul, S. Clifford, J. Cioslowski, B. B. Stefanov, G. Liu, A. Liashenko, P. Piskorz, I. Komaromi, R. L. Martin, D. J. Fox, T. Keith, M. A. Al-Laham, C. Y. Peng, A. Nanayakkara, M. Challacombe, P. M. W. Gill, B. Johnson, W. Chen, M. W. Wong, C. Gonzalez and J. A. Pople, Gaussian 03, Revision E.01, Gaussian, Inc., Wallingford CT, 2004.
8. W. Humphrey, A. Dalke and K. Schulten, *J. Molec. Graphics.*, 1996, **14**, 33-38.
9. G. Schaftenaar and J.H. Noordik, *J. Comput.-Aided Mol. Design*, 2000, **14**, 123.

## PCM applied to the Ionisation Potential of Diphenyl Dichalcogen Naphthalene Systems

The data relating to the conformational preference of the species investigated and adiabatic ionisation potentials has been updated using the DFT-D3 correction for dispersion, an attractive effect which is not readily accounted for by the employed B3LYP functional. Additionally, the effect of solvation, has been approximated using a polarisable continuum model (PCM). Two solvents were investigated, water ( $\epsilon = 78.3553$ ) and tetrahydrofuran ( $\epsilon = 7.4257$ ), to assess the effect of solvent polarity on preferred conformer and thus the adiabatic ionisation potential.

### Neutral Species

**Table S6:** Energetic values for neutral species N7-N12 (B3LYP and B3LYP-D). Dielectric values for PCM calculations were those corresponding to water and THF.

| Gaseous                         |              |              |              |
|---------------------------------|--------------|--------------|--------------|
| Compound                        | N7 AAt       | N7 AB        | N7 CCt       |
| EPh,E'Ph                        | SPh, SPh     | SPh, SPh     | SPh, SPh     |
| B3LYP Energy (Hartree)          | -1644.37642  | -1644.378673 | -1644.378413 |
| B3LYP Energy (kJ/mol)           | -4317310.292 | -4317316.206 | -4317315.524 |
| B3LYP Energy (rel)* / kJ/mol    | 5.91         | 0.00         | 0.68         |
| Dispersion Correction (Hartree) | -0.04413     | -0.04174     | -0.03995     |
| B3LYP-D Energy (Hartree)        | -1644.42055  | -1644.42041  | -1644.41836  |
| B3LYP-D Energy (kJ/mol)         | -4317426.15  | -4317425.78  | -4317420.41  |
| B3LYP-D Energy (rel)* / kJ/mol  | 0.00         | 0.36         | 5.74         |
| Water                           |              |              |              |
| Compound                        | N7 AAt       | N7 AB        | N7 CCt       |
| EPh,E'Ph                        | SPh, SPh     | SPh, SPh     | SPh, SPh     |
| B3LYP Energy (Hartree)          | -1644.395102 | -1644.396451 | -1644.397208 |
| B3LYP Energy (kJ/mol)           | -4317359.341 | -4317362.882 | -4317364.871 |
| B3LYP Energy (rel)* / kJ/mol    | 5.53         | 1.99         | 0.00         |
| Dispersion Correction (Hartree) | -0.04413     | -0.04174     | -0.03995     |
| B3LYP-D Energy (Hartree)        | -1644.43923  | -1644.43819  | -1644.43716  |
| B3LYP-D Energy (kJ/mol)         | -4317475.20  | -4317472.46  | -4317469.76  |
| B3LYP-D Energy (rel)* / kJ/mol  | 0.00         | 2.74         | 5.44         |
| THF                             |              |              |              |
| Compound                        | N7 AAt       | N7 AB        | N7 CCt       |
| EPh,E'Ph                        | SPh, SPh     | SPh, SPh     | SPh, SPh     |
| B3LYP Energy (Hartree)          | -1644.390337 | -1644.391974 | -1644.392539 |
| B3LYP Energy (kJ/mol)           | -4317346.829 | -4317351.127 | -4317352.611 |
| B3LYP Energy (rel)* / kJ/mol    | 5.78         | 1.48         | 0.00         |
| Dispersion Correction (Hartree) | -0.04413     | -0.04174     | -0.03995     |
| B3LYP-D Energy (Hartree)        | -1644.43446  | -1644.43371  | -1644.43249  |
| B3LYP-D Energy (kJ/mol)         | -4317462.68  | -4317460.70  | -4317457.50  |
| B3LYP-D Energy (rel)* / kJ/mol  | 0.00         | 1.98         | 5.19         |
| Gaseous                         |              |              |              |
| Compound                        | N8 AB        | N8 AAt       | N8 CCt       |
| EPh,E'Ph                        | SePh, SePh   | SePh, SePh   | SePh, SePh   |
| B3LYP Energy (Hartree)          | -5650.69709  | -5650.691889 | -5650.69767  |

|                                 |              |              |              |
|---------------------------------|--------------|--------------|--------------|
| B3LYP Energy (kJ/mol)           | -14835905.21 | -14835891.55 | -14835906.73 |
| B3LYP Energy (rel)* / kJ/mol    | 1.52         | 15.18        | 0.00         |
| Dispersion Correction (Hartree) | -0.04289     | -0.04646     | -0.04153     |
| B3LYP-D Energy (Hartree)        | -5650.73998  | -5650.73834  | -5650.73920  |
| B3LYP-D Energy (kJ/mol)         | -14836017.82 | -14836013.52 | -14836015.78 |
| B3LYP-D Energy (rel)* / kJ/mol  | 0.00         | 4.30         | 2.05         |

Water

| <b>Compound</b>                 | <b>N8 AB</b> | <b>N8 AAt</b> | <b>N8 CCt</b> |
|---------------------------------|--------------|---------------|---------------|
| EPh,E'Ph                        | SePh, SePh   | SePh, SePh    | SePh, SePh    |
| B3LYP Energy (Hartree)          | -5650.715056 | -5650.709883  | -5650.696199  |
| B3LYP Energy (kJ/mol)           | -14835952.38 | -14835938.8   | -14835902.87  |
| B3LYP Energy (rel)* / kJ/mol    | 0.00         | 13.58         | 49.51         |
| Dispersion Correction (Hartree) | -0.04289     | -0.04646      | -0.04153      |
| B3LYP-D Energy (Hartree)        | -5650.75795  | -5650.75634   | -5650.73773   |
| B3LYP-D Energy (kJ/mol)         | -14836064.99 | -14836060.77  | -14836011.91  |
| B3LYP-D Energy (rel)* / kJ/mol  | 0.00         | 4.22          | 53.08         |

THF

| <b>Compound</b>                 | <b>N8 AB</b> | <b>N8 AAt</b> | <b>N8 CCt</b> |
|---------------------------------|--------------|---------------|---------------|
| EPh,E'Ph                        | SePh, SePh   | SePh, SePh    | SePh, SePh    |
| B3LYP Energy (Hartree)          | -5650.710487 | -5650.705165  | -5650.691527  |
| B3LYP Energy (kJ/mol)           | -14835940.38 | -14835926.41  | -14835890.6   |
| B3LYP Energy (rel)* / kJ/mol    | 0.00         | 13.97         | 49.78         |
| Dispersion Correction (Hartree) | -0.04289     | -0.04646      | -0.04153      |
| B3LYP-D Energy (Hartree)        | -5650.75338  | -5650.75162   | -5650.73306   |
| B3LYP-D Energy (kJ/mol)         | -14836052.99 | -14836048.38  | -14835999.65  |
| B3LYP-D Energy (rel)* / kJ/mol  | 0.00         | 4.61          | 53.35         |

Gaseous

| <b>Compound</b>                 | <b>N9 CCc</b> | <b>N9 CCt</b> |
|---------------------------------|---------------|---------------|
| EPh,E'Ph                        | TePh, TePh    | TePh, TePh    |
| B3LYP Energy (Hartree)          | -864.1360815  | -864.1372566  |
| B3LYP Energy (kJ/mol)           | -2268789.282  | -2268792.367  |
| B3LYP Energy (rel)* / kJ/mol    | 3.09          | 0.00          |
| Dispersion Correction (Hartree) | -0.04299      | -0.04197      |
| B3LYP-D Energy (Hartree)        | -864.17908    | -864.17923    |
| B3LYP-D Energy (kJ/mol)         | -2268902.16   | -2268902.57   |
| B3LYP-D Energy (rel)* / kJ/mol  | 0.40          | 0.00          |

Water

| <b>Compound</b>              | <b>N9 CCc</b> | <b>N9 CCt</b> |
|------------------------------|---------------|---------------|
| EPh,E'Ph                     | TePh, TePh    | TePh, TePh    |
| B3LYP Energy (Hartree)       | -864.1535651  | -864.1551414  |
| B3LYP Energy (kJ/mol)        | -2268835.185  | -2268839.324  |
| B3LYP Energy (rel)* / kJ/mol | 4.14          | 0.00          |

|                                 |             |             |
|---------------------------------|-------------|-------------|
| Dispersion Correction (Hartree) | -0.04299    | -0.04197    |
| B3LYP-D Energy (Hartree)        | -864.19656  | -864.19711  |
| B3LYP-D Energy (kJ/mol)         | -2268948.07 | -2268949.52 |
| B3LYP-D Energy (rel)* / kJ/mol  | 1.46        | 0.00        |

THF

| <b>Compound</b>                 | <b>N9 CCc</b> | <b>N9 CCt</b> |
|---------------------------------|---------------|---------------|
| EPh,E'Ph                        | TePh, TePh    | TePh, TePh    |
| B3LYP Energy (Hartree)          | -864.1491936  | -864.1508008  |
| B3LYP Energy (kJ/mol)           | -2268823.708  | -2268827.927  |
| B3LYP Energy (rel)* / kJ/mol    | 4.22          | 0.00          |
| Dispersion Correction (Hartree) | -0.04299      | -0.04197      |
| B3LYP-D Energy (Hartree)        | -864.19219    | -864.19277    |
| B3LYP-D Energy (kJ/mol)         | -2268936.59   | -2268938.13   |
| B3LYP-D Energy (rel)* / kJ/mol  | 1.54          | 0.00          |

Gaseous

| <b>Compound</b>                 | <b>N10 AAt</b> | <b>N10 BA</b> |
|---------------------------------|----------------|---------------|
| EPh,E'Ph                        | SePh, SPh      | SePh, SPh     |
| B3LYP Energy (Hartree)          | -3647.534214   | -3647.53997   |
| B3LYP Energy (kJ/mol)           | -9576601.078   | -9576616.19   |
| B3LYP Energy (rel)* / kJ/mol    | 15.11          | 0.00          |
| Dispersion Correction (Hartree) | -0.04541       | -0.04207      |
| B3LYP-D Energy (Hartree)        | -3647.57962    | -3647.58204   |
| B3LYP-D Energy (kJ/mol)         | -9576720.30    | -9576726.65   |
| B3LYP-D Energy (rel)* / kJ/mol  | 6.35           | 0.00          |

Water

| <b>Compound</b>                 | <b>N10 AAt</b> | <b>N10 BA</b> |
|---------------------------------|----------------|---------------|
| EPh,E'Ph                        | SePh, SPh      | SePh, SPh     |
| B3LYP Energy (Hartree)          | -3647.552339   | -3647.558137  |
| B3LYP Energy (kJ/mol)           | -9576648.665   | -9576663.888  |
| B3LYP Energy (rel)* / kJ/mol    | 15.22          | 0.00          |
| Dispersion Correction (Hartree) | -0.04541       | -0.04207      |
| B3LYP-D Energy (Hartree)        | -3647.59775    | -3647.60021   |
| B3LYP-D Energy (kJ/mol)         | -9576767.89    | -9576774.35   |
| B3LYP-D Energy (rel)* / kJ/mol  | 6.46           | 0.00          |

THF

| <b>Compound</b>                 | <b>N10 AAt</b> | <b>N10 BA</b> |
|---------------------------------|----------------|---------------|
| EPh,E'Ph                        | SePh, SPh      | SePh, SPh     |
| B3LYP Energy (Hartree)          | -3647.547717   | -3647.553562  |
| B3LYP Energy (kJ/mol)           | -9576636.53    | -9576651.878  |
| B3LYP Energy (rel)* / kJ/mol    | 15.35          | 0.00          |
| Dispersion Correction (Hartree) | -0.04541       | -0.04207      |
| B3LYP-D Energy (Hartree)        | -3647.59313    | -3647.59563   |

|                                |             |             |
|--------------------------------|-------------|-------------|
| B3LYP-D Energy (kJ/mol)        | -9576755.75 | -9576762.34 |
| B3LYP-D Energy (rel)* / kJ/mol | 6.58        | 0.00        |

Gaseous

| <b>Compound</b>                 | <b>N11 BA</b> |  |
|---------------------------------|---------------|--|
| EPh,E'Ph                        | TePh, SPh     |  |
| B3LYP Energy (Hartree)          | -1254.262508  |  |
| B3LYP Energy (kJ/mol)           | -3293066.214  |  |
| B3LYP Energy (rel)* / kJ/mol    | N/A           |  |
| Dispersion Correction (Hartree) | -0.04251      |  |
| B3LYP-D Energy (Hartree)        | -1254.30502   |  |
| B3LYP-D Energy (kJ/mol)         | -3293177.82   |  |
| B3LYP-D Energy (rel)* / kJ/mol  | N/A           |  |

Water

| <b>Compound</b>                 | <b>N11 BA</b> |  |
|---------------------------------|---------------|--|
| EPh,E'Ph                        | TePh, SPh     |  |
| B3LYP Energy (Hartree)          | -1254.280317  |  |
| B3LYP Energy (kJ/mol)           | -3293112.972  |  |
| B3LYP Energy (rel)* / kJ/mol    | N/A           |  |
| Dispersion Correction (Hartree) | -0.04251      |  |
| B3LYP-D Energy (Hartree)        | -1254.32283   |  |
| B3LYP-D Energy (kJ/mol)         | -3293224.58   |  |
| B3LYP-D Energy (rel)* / kJ/mol  | N/A           |  |

THF

| <b>Compound</b>                 | <b>N11 BA</b> |  |
|---------------------------------|---------------|--|
| EPh,E'Ph                        | TePh, SPh     |  |
| B3LYP Energy (Hartree)          | -1254.275919  |  |
| B3LYP Energy (kJ/mol)           | -3293101.425  |  |
| B3LYP Energy (rel)* / kJ/mol    | N/A           |  |
| Dispersion Correction (Hartree) | -0.04251      |  |
| B3LYP-D Energy (Hartree)        | -1254.31843   |  |
| B3LYP-D Energy (kJ/mol)         | -3293213.04   |  |
| B3LYP-D Energy (rel)* / kJ/mol  | N/A           |  |

Gaseous

| <b>Compound</b>                 | <b>N12 BA</b> |  |
|---------------------------------|---------------|--|
| EPh,E'Ph                        | TePh, SePh    |  |
| B3LYP Energy (Hartree)          | -3257.420256  |  |
| B3LYP Energy (kJ/mol)           | -8552356.881  |  |
| B3LYP Energy (rel)* / kJ/mol    | N/A           |  |
| Dispersion Correction (Hartree) | -0.04302      |  |
| B3LYP-D Energy (Hartree)        | -3257.46328   |  |
| B3LYP-D Energy (kJ/mol)         | -8552469.84   |  |
| B3LYP-D Energy (rel)* / kJ/mol  | N/A           |  |

## Water

| <b>Compound</b>                 | <b>N12 BA</b> |
|---------------------------------|---------------|
| EPh,E'Ph                        | TePh, SePh    |
| B3LYP Energy (Hartree)          | -3257.437899  |
| B3LYP Energy (kJ/mol)           | -8552403.205  |
| B3LYP Energy (rel)* / kJ/mol    | N/A           |
| Dispersion Correction (Hartree) | -0.04302      |
| B3LYP-D Energy (Hartree)        | -3257.48092   |
| B3LYP-D Energy (kJ/mol)         | -8552516.16   |
| B3LYP-D Energy (rel)* / kJ/mol  | N/A           |

## THF

| <b>Compound</b>                 | <b>N12 BA</b> |
|---------------------------------|---------------|
| EPh,E'Ph                        | TePh, SePh    |
| B3LYP Energy (Hartree)          | -3257.433641  |
| B3LYP Energy (kJ/mol)           | -8552392.023  |
| B3LYP Energy (rel)* / kJ/mol    | N/A           |
| Dispersion Correction (Hartree) | -0.04302      |
| B3LYP-D Energy (Hartree)        | -3257.47666   |
| B3LYP-D Energy (kJ/mol)         | -8552504.98   |
| B3LYP-D Energy (rel)* / kJ/mol  | N/A           |

---

## Monocations

**Table S7:** Energetic values for monocationic species **N7-N12** (B3LYP and B3LYP-D).

| Gaseous                         |               |               |
|---------------------------------|---------------|---------------|
| <b>Compound</b>                 | <b>N7 AAt</b> | <b>N7 CCc</b> |
| EPh,E'Ph                        | SPh, SPh      | SPh, SPh      |
| B3LYP Energy (Hartree)          | -1644.13676   | -1644.13786   |
| B3LYP Energy (kJ/mol)           | -4316681.07   | -4316683.95   |
| B3LYP Energy (rel)* / kJ/mol    | 2.88          | 0             |
| Dispersion correction (Hartree) | -0.04222      | -0.04045      |
| B3LYP-D Energy (Hartree)        | -1644.17898   | -1644.17831   |
| B3LYP-D Energy (kJ/mol)         | -4316791.91   | -4316790.16   |
| B3LYP-D Energy (rel)* / kJ/mol  | 0.00          | 1.75          |
| Water                           |               |               |
| <b>Compound</b>                 | <b>N7 AAt</b> | <b>N7 CCc</b> |
| EPh,E'Ph                        | SPh, SPh      | SPh, SPh      |
| B3LYP Energy (Hartree)          | -1644.20580   | -1644.206961  |
| B3LYP Energy (kJ/mol)           | -4316862.32   | -4316865.38   |
| B3LYP Energy (rel)* / kJ/mol    | 3.06          | 0             |
| Dispersion correction (Hartree) | -0.04222      | -0.04045      |
| B3LYP-D Energy (Hartree)        | -1644.24801   | -1644.24741   |
| B3LYP-D Energy (kJ/mol)         | -4316973.16   | -4316971.59   |
| B3LYP-D Energy (rel)* / kJ/mol  | 0.00          | 1.58          |
| THF                             |               |               |
| <b>Compound</b>                 | <b>N7 AAt</b> | <b>N7 CCc</b> |
| EPh,E'Ph                        | SPh, SPh      | SPh, SPh      |
| B3LYP Energy (Hartree)          | -1644.195037  | -1644.196137  |
| B3LYP Energy (kJ/mol)           | -4316834.07   | -4316836.96   |
| B3LYP Energy (rel)* / kJ/mol    | 2.89          | 0             |
| Dispersion correction (Hartree) | -0.04222      | -0.04045      |
| B3LYP-D Energy (Hartree)        | -1644.23726   | -1644.23659   |
| B3LYP-D Energy (kJ/mol)         | -4316944.91   | -4316943.17   |
| B3LYP-D Energy (rel)* / kJ/mol  | 0.00          | 1.75          |
| Gaseous                         |               |               |
| <b>Compound</b>                 | <b>N8 AAc</b> | <b>N8 AAt</b> |
| EPh,E'Ph                        | SePh,SePh     | SePh, SePh    |
| B3LYP Energy (Hartree)          | -5650.46167   | -5650.46269   |
| B3LYP Energy (kJ/mol)           | -14835287.11  | -14835289.81  |
| B3LYP Energy (rel)* / kJ/mol    | 2.69          | 0             |
| Dispersion Correction (Hartree) | -0.04512      | -0.04421      |
| B3LYP-D Energy (Hartree)        | -5650.50679   | -5650.50691   |
| B3LYP-D Energy (kJ/mol)         | -14835405.57  | -14835405.88  |
| B3LYP-D Energy (rel)* / kJ/mol  | 0.31          | 0.00          |



| Water                           |              |              |
|---------------------------------|--------------|--------------|
| Compound                        | N8 AAc       | N8 AAt       |
| EPh,E'Ph                        | SePh,SePh    | SePh, SePh   |
| B3LYP Energy (Hartree)          | -5650.532534 | -5650.532402 |
| B3LYP Energy (kJ/mol)           | -5650.532534 | -5650.532402 |
| B3LYP Energy (rel)* / kJ/mol    | 0.00         | 0            |
| Dispersion Correction (Hartree) | -0.04512     | -0.04421     |
| B3LYP-D Energy (Hartree)        | -5650.57765  | -5650.57661  |
| B3LYP-D Energy (kJ/mol)         | -14835591.63 | -14835588.90 |
| B3LYP-D Energy (rel)* / kJ/mol  | -2.73        | 0.00         |

| THF                             |              |              |
|---------------------------------|--------------|--------------|
| Compound                        | N8 AAc       | N8 AAt       |
| EPh,E'Ph                        | SePh,SePh    | SePh, SePh   |
| B3LYP Energy (Hartree)          | -5650.521565 | -5650.521349 |
| B3LYP Energy (kJ/mol)           | -14835444.37 | -14835443.80 |
| B3LYP Energy (rel)* / kJ/mol    | -0.57        | 0            |
| Dispersion Correction (Hartree) | -0.04512     | -0.04421     |
| B3LYP-D Energy (Hartree)        | -5650.56668  | -5650.56556  |
| B3LYP-D Energy (kJ/mol)         | -14835562.83 | -14835559.87 |
| B3LYP-D Energy (rel)* / kJ/mol  | -2.96        | 0.00         |

| Gaseous                         |             |             |             |
|---------------------------------|-------------|-------------|-------------|
| Compound                        | N9 AAc      | N9 AAt      | N9 BB       |
| EPh,E'Ph                        | TePh, TePh  | TePh, TePh  | TePh, TePh  |
| B3LYP Energy (Hartree)          | -863.90680  | -863.90888  | -863.89743  |
| B3LYP Energy (kJ/mol)           | -2268187.31 | -2268192.77 | -2268162.70 |
| B3LYP Energy (rel)* / kJ/mol    | 5.46        | 0           | 30.07       |
| Dispersion Correction (Hartree) | -0.04611    | -0.04503    | -0.04117    |
| B3LYP-D Energy (Hartree)        | -863.95291  | -863.95391  | -863.93860  |
| B3LYP-D Energy (kJ/mol)         | -2268308.38 | -2268310.98 | -2268270.79 |
| B3LYP-D Energy (rel)* / kJ/mol  | 2.61        | 0.00        | 40.19       |

| Water                           |             |              |              |
|---------------------------------|-------------|--------------|--------------|
| Compound                        | N9 AAc      | N9 AAt       | N9 BB        |
| EPh,E'Ph                        | TePh, TePh  | TePh, TePh   | TePh, TePh   |
| B3LYP Energy (Hartree)          | -863.980051 | -863.9809118 | -863.9649427 |
| B3LYP Energy (kJ/mol)           | -2268379.62 | -2268381.88  | -2268339.96  |
| B3LYP Energy (rel)* / kJ/mol    | 2.26        | 0            | 41.93        |
| Dispersion Correction (Hartree) | -0.04611    | -0.04503     | -0.04117     |
| B3LYP-D Energy (Hartree)        | -864.02616  | -864.02594   | -864.00611   |
| B3LYP-D Energy (kJ/mol)         | -2268500.70 | -2268500.10  | -2268448.05  |
| B3LYP-D Energy (rel)* / kJ/mol  | -0.60       | 0.00         | 52.04        |

THF

| <b>Compound</b>                 | <b>N9 AAc</b> | <b>N9 AAt</b> | <b>N9 BB</b> |
|---------------------------------|---------------|---------------|--------------|
| EPh,E'Ph                        | TePh, TePh    | TePh, TePh    | TePh, TePh   |
| B3LYP Energy (Hartree)          | -863.9681875  | -863.9690226  | -863.9546427 |
| B3LYP Energy (kJ/mol)           | -2268348.48   | -2268350.67   | -2268312.91  |
| B3LYP Energy (rel)* / kJ/mol    | 2.19          | 0             | 37.75        |
| Dispersion Correction (Hartree) | -0.04611      | -0.04503      | -0.04117     |
| B3LYP-D Energy (Hartree)        | -864.01430    | -864.01405    | -863.99581   |
| B3LYP-D Energy (kJ/mol)         | -2268469.55   | -2268468.88   | -2268421.01  |
| B3LYP-D Energy (rel)* / kJ/mol  | -0.66         | 0.00          | 47.87        |

Gaseous

| <b>Compound</b>                 | <b>N10 AAt</b> | <b>N10 CCc</b> |
|---------------------------------|----------------|----------------|
| EPh,E'Ph                        | SePh, SPh      | SePh, SPh      |
| B3LYP Energy (Hartree)          | -3647.29995    | -3647.29950    |
| B3LYP Energy (kJ/mol)           | -9575986.03    | -9575984.83    |
| B3LYP Energy (rel)* / kJ/mol    | 0              | 1.19           |
| Dispersion Correction (Hartree) | -0.04320       | -0.04161       |
| B3LYP-D Energy (Hartree)        | -3647.34316    | -3647.34111    |
| B3LYP-D Energy (kJ/mol)         | -9576099.46    | -9576094.08    |
| B3LYP-D Energy (rel)* / kJ/mol  | 0.00           | 5.37           |

Water

| <b>Compound</b>                 | <b>N10 AAt</b> | <b>N10 CCc</b> |
|---------------------------------|----------------|----------------|
| EPh,E'Ph                        | SePh, SPh      | SePh, SPh      |
| B3LYP Energy (Hartree)          | -3647.36941    | -3647.368975   |
| B3LYP Energy (kJ/mol)           | -9576168.39    | -9576167.24    |
| B3LYP Energy (rel)* / kJ/mol    | 0              | 1.14           |
| Dispersion Correction (Hartree) | -0.04320       | -0.04161       |
| B3LYP-D Energy (Hartree)        | -3647.41261    | -3647.41059    |
| B3LYP-D Energy (kJ/mol)         | -9576281.82    | -9576276.49    |
| B3LYP-D Energy (rel)* / kJ/mol  | 0.00           | 5.32           |

THF

| <b>Compound</b>                 | <b>N10 AAt</b> | <b>N10 CCc</b> |
|---------------------------------|----------------|----------------|
| EPh,E'Ph                        | SePh, SPh      | SePh, SPh      |
| B3LYP Energy (Hartree)          | -3647.358496   | -3647.35782    |
| B3LYP Energy (kJ/mol)           | -9576139.73    | -9576137.96    |
| B3LYP Energy (rel)* / kJ/mol    | 0              | 1.77           |
| Dispersion Correction (Hartree) | -0.04320       | -0.04161       |
| B3LYP-D Energy (Hartree)        | -3647.40170    | -3647.39943    |
| B3LYP-D Energy (kJ/mol)         | -9576253.16    | -9576247.21    |
| B3LYP-D Energy (rel)* / kJ/mol  | 0.00           | 5.95           |

Gaseous

| <b>Compound</b>                 | <b>N11 AAc</b> | <b>N11 AAt</b> | <b>N11 CCc</b> |
|---------------------------------|----------------|----------------|----------------|
| EPh,E'Ph                        | TePh, SPh      | TePh, SPh      | TePh, SPh      |
| B3LYP Energy (Hartree)          | -1254.02294    | -1254.02422    | -1254.02329    |
| B3LYP Energy (kJ/mol)           | -3292437.23    | -3292440.60    | -3292438.14    |
| B3LYP Energy (rel)* / kJ/mol    | 3.38           | 0              | 2.47           |
| Dispersion Correction (Hartree) | -0.04388       | -0.04378       | -0.04218       |
| B3LYP-D Energy (Hartree)        | -1254.06682    | -1254.06801    | -1254.06547    |
| B3LYP-D Energy (kJ/mol)         | -3292552.43    | -3292555.56    | -3292548.88    |
| B3LYP-D Energy (rel)* / kJ/mol  | 3.13           | 0.00           | 6.68           |

Water

| <b>Compound</b>                 | <b>N11 AAc</b> | <b>N11 AAt</b> | <b>N11 CCc</b> |
|---------------------------------|----------------|----------------|----------------|
| EPh,E'Ph                        | TePh, SPh      | TePh, SPh      | TePh, SPh      |
| B3LYP Energy (Hartree)          | -1254.095118   | -1254.095523   | -1254.093988   |
| B3LYP Energy (kJ/mol)           | -3292626.73    | -3292627.79    | -3292623.77    |
| B3LYP Energy (rel)* / kJ/mol    | 1.06           | 0              | 4.03           |
| Dispersion Correction (Hartree) | -0.04388       | -0.04378       | -0.04218       |
| B3LYP-D Energy (Hartree)        | -1254.13899    | -1254.13931    | -1254.13617    |
| B3LYP-D Energy (kJ/mol)         | -3292741.93    | -3292742.75    | -3292734.51    |
| B3LYP-D Energy (rel)* / kJ/mol  | 0.82           | 0.00           | 8.24           |

THF

| <b>Compound</b>                 | <b>N11 AAc</b> | <b>N11 AAt</b> | <b>N11 CCc</b> |
|---------------------------------|----------------|----------------|----------------|
| EPh,E'Ph                        | TePh, SPh      | TePh, SPh      | TePh, SPh      |
| B3LYP Energy (Hartree)          | -1254.083306   | -1254.08381    | -1254.082227   |
| B3LYP Energy (kJ/mol)           | -3292595.72    | -3292597.04    | -3292592.89    |
| B3LYP Energy (rel)* / kJ/mol    | 1.32           | 0              | 4.16           |
| Dispersion Correction (Hartree) | -0.04388       | -0.04378       | -0.04218       |
| B3LYP-D Energy (Hartree)        | -1254.12718    | -1254.12759    | -1254.12441    |
| B3LYP-D Energy (kJ/mol)         | -3292710.92    | -3292712.00    | -3292703.63    |
| B3LYP-D Energy (rel)* / kJ/mol  | 1.08           | 0.00           | 8.37           |

Gaseous

| <b>Compound</b>                 | <b>N12 AAc</b> | <b>N12 AAt</b> |
|---------------------------------|----------------|----------------|
| EPh,E'Ph                        | TePh, SePh     | TePh, SePh     |
| B3LYP Energy (Hartree)          | -3257.18489    | -3257.18653    |
| B3LYP Energy (kJ/mol)           | -8551738.92    | -8551743.23    |
| B3LYP Energy (rel)* / kJ/mol    | 4.31           | 0              |
| Dispersion Correction (Hartree) | -0.04596       | -0.04474       |
| B3LYP-D Energy (Hartree)        | -3257.23084    | -3257.23127    |
| B3LYP-D Energy (kJ/mol)         | -8551859.58    | -8551860.70    |
| B3LYP-D Energy (rel)* / kJ/mol  | 1.13           | 0              |

Water

| <b>Compound</b> | <b>N12 AAc</b> | <b>N12 AAt</b> |
|-----------------|----------------|----------------|
|-----------------|----------------|----------------|

| EPh,E'Ph                        | TePh, SePh   | TePh, SePh   |
|---------------------------------|--------------|--------------|
| B3LYP Energy (Hartree)          | -3257.257056 | -3257.257607 |
| B3LYP Energy (kJ/mol)           | -8551928.40  | -8551929.85  |
| B3LYP Energy (rel)* / kJ/mol    | 1.45         | 0            |
| Dispersion Correction (Hartree) | -0.04596     | -0.04474     |
| B3LYP-D Energy (Hartree)        | -3257.30301  | -3257.30235  |
| B3LYP-D Energy (kJ/mol)         | -8552049.06  | -8552047.32  |
| B3LYP-D Energy (rel)* / kJ/mol  | -1.74        | 0            |

| THF                             |              |              |
|---------------------------------|--------------|--------------|
| Compound                        | N12 AAc      | N12 AAt      |
| EPh,E'Ph                        | TePh, SePh   | TePh, SePh   |
| B3LYP Energy (Hartree)          | -3257.245918 | -3257.245943 |
| B3LYP Energy (kJ/mol)           | -8551899.16  | -8551899.22  |
| B3LYP Energy (rel)* / kJ/mol    | 0.06         | 0            |
| Dispersion Correction (Hartree) | -0.04596     | -0.04474     |
| B3LYP-D Energy (Hartree)        | -3257.29187  | -3257.29069  |
| B3LYP-D Energy (kJ/mol)         | -8552019.82  | -8552016.69  |
| B3LYP-D Energy (rel)* / kJ/mol  | -3.12        | 0            |

---

## Dications

**Table S8:** Energetic values for dicationic species **N7-N12** (B3LYP and B3LYP-D).

| Gaseous                         |               |               |                 |               |
|---------------------------------|---------------|---------------|-----------------|---------------|
| <b>Compound</b>                 | <b>N7 AAt</b> | <b>N7 ACc</b> | <b>N7 BA(d)</b> | <b>N7 CCc</b> |
| EPh,E'Ph                        | SPh, SPh      | SPh, SPh      | SPh, SPh        | SPh, SPh      |
| B3LYP Energy (Hartree)          | -1643.75719   | -1643.75752   | -1643.74442     | -1643.76591   |
| B3LYP Energy (kJ/mol)           | -4315684.50   | -4315685.36   | -4315650.98     | -4315707.39   |
| B3LYP Energy (rel)* / kJ/mol    | 22.89         | 22.03         | 56.41           | 0.00          |
| Dispersion Correction (Hartree) | -0.04243      | -0.04245      | -0.04430        | -0.04081      |
| B3LYP-D Energy (Hartree)        | -1643.79962   | -1643.79997   | -1643.78872     | -1643.80672   |
| B3LYP-D Energy (kJ/mol)         | -4315795.91   | -4315796.81   | -4315767.28     | -4315814.55   |
| B3LYP-D Energy (rel)* / kJ/mol  | 18.63         | 17.74         | 47.27           | 0.00          |
| Water                           |               |               |                 |               |
| <b>Compound</b>                 | <b>N7 AAt</b> | <b>N7 ACc</b> | <b>N7 BA(d)</b> | <b>N7 CCc</b> |
| EPh,E'Ph                        | SPh, SPh      | SPh, SPh      | SPh, SPh        | SPh, SPh      |
| B3LYP Energy (Hartree)          | -1643.987135  | -1643.985943  | -1643.974543    | -1643.99417   |
| B3LYP Energy (kJ/mol)           | -4316288.22   | -4316285.09   | -4316255.16     | -4316306.69   |
| B3LYP Energy (rel)* / kJ/mol    | 18.47         | 21.60         | 51.53           | 0.00          |
| Dispersion Correction (Hartree) | -0.04243      | -0.04245      | -0.04430        | -0.04081      |
| B3LYP-D Energy (Hartree)        | -1644.02957   | -1644.02839   | -1644.01884     | -1644.03498   |
| B3LYP-D Energy (kJ/mol)         | -4316399.63   | -4316396.54   | -4316371.46     | -4316413.85   |
| B3LYP-D Energy (rel)* / kJ/mol  | 14.22         | 17.31         | 42.39           | 0.00          |
| THF                             |               |               |                 |               |
| <b>Compound</b>                 | <b>N7 AAt</b> | <b>N7 ACc</b> | <b>N7 BA(d)</b> | <b>N7 CCc</b> |
| EPh,E'Ph                        | SPh, SPh      | SPh, SPh      | SPh, SPh        | SPh, SPh      |
| B3LYP Energy (Hartree)          | -1643.953758  | -1643.953428  | -1643.943142    | -1643.961743  |
| B3LYP Energy (kJ/mol)           | -4316200.59   | -4316199.73   | -4316172.72     | -4316221.56   |
| B3LYP Energy (rel)* / kJ/mol    | 20.96         | 21.83         | 48.84           | 0.00          |
| Dispersion Correction (Hartree) | -0.04243      | -0.04245      | -0.04430        | -0.04081      |
| B3LYP-D Energy (Hartree)        | -1643.99619   | -1643.99588   | -1643.98744     | -1644.00256   |
| B3LYP-D Energy (kJ/mol)         | -4316312.00   | -4316311.18   | -4316289.02     | -4316328.71   |
| B3LYP-D Energy (rel)* / kJ/mol  | 16.71         | 17.54         | 39.69           | 0.00          |
| Gaseous                         |               |               |                 |               |
| <b>Compound</b>                 | <b>N8 AAt</b> | <b>N8 CCc</b> |                 |               |
| EPh,E'Ph                        | SePh, SePh    | SePh, SePh    |                 |               |
| B3LYP Energy (Hartree)          | -5650.09478   | -5650.09493   |                 |               |
| B3LYP Energy (kJ/mol)           | -14834323.84  | -14834324.24  |                 |               |
| B3LYP Energy (rel)* / kJ/mol    | 0.40          | 0.00          |                 |               |
| Dispersion Correction (Hartree) | -0.04435      | -0.04323      |                 |               |
| B3LYP-D Energy (Hartree)        | -5650.13913   | -5650.13817   |                 |               |
| B3LYP-D Energy (kJ/mol)         | -14834440.30  | -14834437.75  |                 |               |
| B3LYP-D Energy (rel)* / kJ/mol  | 0.00          | 2.54          |                 |               |

Water

| <b>Compound</b>                 | <b>N8 AAt</b> | <b>N8 CCc</b> |
|---------------------------------|---------------|---------------|
| EPh,E'Ph                        | SePh, SePh    | SePh, SePh    |
| B3LYP Energy (Hartree)          | -5650.327928  | -5650.327141  |
| B3LYP Energy (kJ/mol)           | -14834935.98  | -14834933.91  |
| B3LYP Energy (rel)* / kJ/mol    | -2.07         | 0.00          |
| Dispersion Correction (Hartree) | -0.04435      | -0.04323      |
| B3LYP-D Energy (Hartree)        | -5650.37228   | -5650.37037   |
| B3LYP-D Energy (kJ/mol)         | -14835052.43  | -14835047.42  |
| B3LYP-D Energy (rel)* / kJ/mol  | 0.00          | 5.01          |

THF

| <b>Compound</b>                 | <b>N8 AAt</b> | <b>N8 CCc</b> |
|---------------------------------|---------------|---------------|
| EPh,E'Ph                        | SePh, SePh    | SePh, SePh    |
| B3LYP Energy (Hartree)          | -5650.293608  | -5650.293605  |
| B3LYP Energy (kJ/mol)           | -14834845.87  | -14834845.86  |
| B3LYP Energy (rel)* / kJ/mol    | 0.00          | 0.01          |
| Dispersion Correction (Hartree) | -0.04435      | -0.04323      |
| B3LYP-D Energy (Hartree)        | -5650.33796   | -5650.33684   |
| B3LYP-D Energy (kJ/mol)         | -14834962.32  | -14834959.37  |
| B3LYP-D Energy (rel)* / kJ/mol  | 0.00          | 2.95          |

Gaseous

| <b>Compound</b>                 | <b>N9 AAc</b> | <b>N9 AAt</b> |
|---------------------------------|---------------|---------------|
| EPh,E'Ph                        | TePh, TePh    | TePh, TePh    |
| B3LYP Energy (Hartree)          | -863.55282    | -863.55525    |
| B3LYP Energy (kJ/mol)           | -2267257.93   | -2267264.32   |
| B3LYP Energy (rel)* / kJ/mol    | 6.39          | 0.00          |
| Dispersion Correction (Hartree) | -0.04560      | -0.04474      |
| B3LYP-D Energy (Hartree)        | -863.59842    | -863.60000    |
| B3LYP-D Energy (kJ/mol)         | -2267377.65   | -2267381.79   |
| B3LYP-D Energy (rel)* / kJ/mol  | 4.14          | 0.00          |

Water

| <b>Compound</b>                 | <b>N9 AAc</b> | <b>N9 AAt</b> |
|---------------------------------|---------------|---------------|
| EPh,E'Ph                        | TePh, TePh    | TePh, TePh    |
| B3LYP Energy (Hartree)          | -863.7945982  | -863.7946833  |
| B3LYP Energy (kJ/mol)           | -2267892.72   | -2267892.94   |
| B3LYP Energy (rel)* / kJ/mol    | 0.22          | 0.00          |
| Dispersion Correction (Hartree) | -0.04560      | -0.04474      |
| B3LYP-D Energy (Hartree)        | -863.84020    | -863.83943    |
| B3LYP-D Energy (kJ/mol)         | -2268012.44   | -2268010.41   |
| B3LYP-D Energy (rel)* / kJ/mol  | 0.00          | 2.02          |

THF

| <b>Compound</b> | <b>N9 AAc</b> | <b>N9 AAt</b> |
|-----------------|---------------|---------------|
|-----------------|---------------|---------------|

|                                 |              |              |
|---------------------------------|--------------|--------------|
| EPh,E'Ph                        | TePh, TePh   | TePh, TePh   |
| B3LYP Energy (Hartree)          | -863.7590289 | -863.7577816 |
| B3LYP Energy (kJ/mol)           | -2267799.33  | -2267796.06  |
| B3LYP Energy (rel)* / kJ/mol    | -3.27        | 0.00         |
| Dispersion Correction (Hartree) | -0.04560     | -0.04474     |
| B3LYP-D Energy (Hartree)        | -863.80463   | -863.80252   |
| B3LYP-D Energy (kJ/mol)         | -2267919.05  | -2267913.53  |
| B3LYP-D Energy (rel)* / kJ/mol  | 0.00         | 5.52         |

Gaseous

| <b>Compound</b>                 | <b>N10 AAt</b> | <b>N10 CCc</b> |
|---------------------------------|----------------|----------------|
| EPh,E'Ph                        | SePh, SPh      | SePh, SPh      |
| B3LYP Energy (Hartree)          | -3646.92620    | -3646.93008    |
| B3LYP Energy (kJ/mol)           | -9575004.74    | -9575014.93    |
| B3LYP Energy (rel)* / kJ/mol    | 10.19          | 0.00           |
| Dispersion Correction (Hartree) | -0.04342       | -0.04183       |
| B3LYP-D Energy (Hartree)        | -3646.96962    | -3646.97191    |
| B3LYP-D Energy (kJ/mol)         | -9575118.73    | -9575124.74    |
| B3LYP-D Energy (rel)* / kJ/mol  | 6.01           | 0.00           |

Water

| <b>Compound</b>                 | <b>N10 AAt</b> | <b>N10 CCc</b> |
|---------------------------------|----------------|----------------|
| EPh,E'Ph                        | SePh, SPh      | SePh, SPh      |
| B3LYP Energy (Hartree)          | -3647.157651   | -3647.159322   |
| B3LYP Energy (kJ/mol)           | -9575612.41    | -9575616.80    |
| B3LYP Energy (rel)* / kJ/mol    | 4.39           | 0.00           |
| Dispersion Correction (Hartree) | -0.04342       | -0.04183       |
| B3LYP-D Energy (Hartree)        | -3647.20107    | -3647.20115    |
| B3LYP-D Energy (kJ/mol)         | -9575726.41    | -9575726.61    |
| B3LYP-D Energy (rel)* / kJ/mol  | 0.21           | 0.00           |

THF

| <b>Compound</b>                 | <b>N10 AAt</b> | <b>N10 CCc</b> |
|---------------------------------|----------------|----------------|
| EPh,E'Ph                        | SePh, SPh      | SePh, SPh      |
| B3LYP Energy (Hartree)          | -3647.124034   | -3647.126596   |
| B3LYP Energy (kJ/mol)           | -9575524.15    | -9575530.88    |
| B3LYP Energy (rel)* / kJ/mol    | 6.73           | 0.00           |
| Dispersion Correction (Hartree) | -0.04342       | -0.04183       |
| B3LYP-D Energy (Hartree)        | -3647.16745    | -3647.16842    |
| B3LYP-D Energy (kJ/mol)         | -9575638.14    | -9575640.69    |
| B3LYP-D Energy (rel)* / kJ/mol  | 2.55           | 0.00           |

Gaseous

| <b>Compound</b>        | <b>N11 AAt</b> | <b>N11 CCc</b> |
|------------------------|----------------|----------------|
| EPh,E'Ph               | TePh, SPh      | TePh, SPh      |
| B3LYP Energy (Hartree) | -1253.65689    | -1253.65719    |

|                                 |             |             |
|---------------------------------|-------------|-------------|
| B3LYP Energy (kJ/mol)           | -3291476.15 | -3291476.97 |
| B3LYP Energy (rel)* / kJ/mol    | 0.81        | 0.00        |
| Dispersion Correction (Hartree) | -0.04378    | -0.04249    |
| B3LYP-D Energy (Hartree)        | -1253.70067 | -1253.69969 |
| B3LYP-D Energy (kJ/mol)         | -3291591.10 | -3291588.53 |
| B3LYP-D Energy (rel)* / kJ/mol  | 0.00        | 2.57        |

Water

| <b>Compound</b>                 | <b>N11 AAt</b> | <b>N11 CCc</b> |
|---------------------------------|----------------|----------------|
| EPh,E'Ph                        | TePh, SPh      | TePh, SPh      |
| B3LYP Energy (Hartree)          | -1253.893465   | -1253.889792   |
| B3LYP Energy (kJ/mol)           | -3292097.29    | -3292087.65    |
| B3LYP Energy (rel)* / kJ/mol    | 0.00           | 9.64           |
| Dispersion Correction (Hartree) | -0.04378       | -0.04249       |
| B3LYP-D Energy (Hartree)        | -1253.93725    | -1253.93229    |
| B3LYP-D Energy (kJ/mol)         | -3292212.24    | -3292199.22    |
| B3LYP-D Energy (rel)* / kJ/mol  | 0.00           | 13.02          |

THF

| <b>Compound</b>                 | <b>N11 AAt</b> | <b>N11 CCc</b> |
|---------------------------------|----------------|----------------|
| EPh,E'Ph                        | TePh, SPh      | TePh, SPh      |
| B3LYP Energy (Hartree)          | -1253.857462   | -1253.855967   |
| B3LYP Energy (kJ/mol)           | -3292002.77    | -3291998.84    |
| B3LYP Energy (rel)* / kJ/mol    | 0.00           | 3.93           |
| Dispersion Correction (Hartree) | -0.04378       | -0.04249       |
| B3LYP-D Energy (Hartree)        | -1253.90124    | -1253.89846    |
| B3LYP-D Energy (kJ/mol)         | -3292117.71    | -3292110.41    |
| B3LYP-D Energy (rel)* / kJ/mol  | 0.00           | 7.30           |

Gaseous

| <b>Compound</b>                 | <b>N12 AAc</b> | <b>N12 AAt</b> |
|---------------------------------|----------------|----------------|
| EPh,E'Ph                        | TePh, SePh     | TePh, SePh     |
| B3LYP Energy (Hartree)          | -3256.82390    | -3256.82557    |
| B3LYP Energy (kJ/mol)           | -8550791.16    | -8550795.54    |
| B3LYP Energy (rel)* / kJ/mol    | 4.38           | 0.00           |
| Dispersion Correction (Hartree) | -0.04500       | -0.04458       |
| B3LYP-D Energy (Hartree)        | -3256.86890    | -3256.87015    |
| B3LYP-D Energy (kJ/mol)         | -8550909.31    | -8550912.58    |
| B3LYP-D Energy (rel)* / kJ/mol  | 3.27           | 0.00           |

Water

| <b>Compound</b>              | <b>N12 AAc</b> | <b>N12 AAt</b> |
|------------------------------|----------------|----------------|
| EPh,E'Ph                     | TePh, SePh     | TePh, SePh     |
| B3LYP Energy (Hartree)       | -3257.062888   | -3257.062564   |
| B3LYP Energy (kJ/mol)        | -8551418.61    | -8551417.76    |
| B3LYP Energy (rel)* / kJ/mol | 0.00           | 0.85           |



|                                 |             |             |
|---------------------------------|-------------|-------------|
| Dispersion Correction (Hartree) | -0.04500    | -0.04458    |
| B3LYP-D Energy (Hartree)        | -3257.10789 | -3257.10714 |
| B3LYP-D Energy (kJ/mol)         | -8551536.76 | -8551534.81 |
| B3LYP-D Energy (rel)* / kJ/mol  | -1.95       | 0.00        |

THF

| Compound                        | N12 AAc      | N12 AAt      |
|---------------------------------|--------------|--------------|
| EPh,E'Ph                        | TePh, SePh   | TePh, SePh   |
| B3LYP Energy (Hartree)          | -3257.027913 | -3257.026845 |
| B3LYP Energy (kJ/mol)           | -8551326.79  | -8551323.98  |
| B3LYP Energy (rel)* / kJ/mol    | 0.00         | 2.81         |
| Dispersion Correction (Hartree) | -0.04500     | -0.04458     |
| B3LYP-D Energy (Hartree)        | -3257.07291  | -3257.07142  |
| B3LYP-D Energy (kJ/mol)         | -8551444.93  | -8551441.03  |
| B3LYP-D Energy (rel)* / kJ/mol  | -3.91        | 0.00         |

## Adiabatic Ionisation Potentials

**Table S9:** Adiabatic ionisation potentials (atomic units and electron volts). Only the lowest energy conformers of the varying chemical compositions were considered. Energies are calculated at the B3LYP and B3LYP-D with differing solvents as approximated through PCM.

| N7                   | Neutral Conformer | Monocation Conformer | Dication Conformer | First I.P. (e.V.) | Second I.P. (e.V.) |
|----------------------|-------------------|----------------------|--------------------|-------------------|--------------------|
| Gaseous              | AB                | CCc                  | CCc                | 6.55              | 10.12              |
| Gaseous (Dispersion) | AAt               | AAt                  | CCc                | 6.57              | 10.13              |
| Water                | CCt               | CCc                  | CCc                | 5.18              | 5.79               |
| Water (Dispersion)   | AAt               | AAt                  | CCc                | 5.20              | 5.80               |
| THF                  | CCt               | CCc                  | CCc                | 5.34              | 6.38               |
| THF (Dispersion)     | AAt               | AAt                  | CCc                | 5.38              | 6.39               |
| <b>N8</b>            |                   |                      |                    |                   |                    |
| Gaseous              | CCt               | AAt                  | CCc                | 6.39              | 10.01              |
| Gaseous (Dispersion) | AB                | AAt                  | AAt                | 6.34              | 10.01              |
| Water                | AB                | AAt                  | CCc                | 4.97              | 5.59               |
| Water (Dispersion)   | AB                | AAt                  | AAt                | 4.93              | 5.56               |
| THF                  | AB                | AAt                  | AAt                | 5.15              | 6.20               |
| THF (Dispersion)     | AB                | AAt                  | AAt                | 5.11              | 6.22               |
| <b>N9</b>            |                   |                      |                    |                   |                    |
| Gaseous              | CCc               | AAt                  | AAt                | 6.21              | 9.62               |
| Gaseous (Dispersion) | CCc               | AAt                  | AAt                | 6.13              | 9.63               |
| Water                | CCc               | AAt                  | AAt                | 4.74              | 5.07               |
| Water (Dispersion)   | CCc               | AAt                  | AAc                | 4.66              | 5.05               |
| THF                  | CCc               | AAt                  | AAt                | 4.95              | 5.75               |
| THF (Dispersion)     | CCc               | AAt                  | AAc                | 4.86              | 5.70               |

**N10**

|                      |    |      |     |      |       |
|----------------------|----|------|-----|------|-------|
| Gaseous              | BA | AAAt | CCc | 6.53 | 10.06 |
| Gaseous (Dispersion) | BA | AAAt | CCc | 6.50 | 10.10 |
| Water                | BA | AAAt | CCc | 5.14 | 5.72  |
| Water (Dispersion)   | BA | AAAt | CCc | 5.10 | 5.75  |
| THF                  | BA | AAAt | CCc | 5.31 | 6.31  |
| THF (Dispersion)     | BA | AAAt | CCc | 5.28 | 6.35  |

**N11**

|                      |    |      |      |      |       |
|----------------------|----|------|------|------|-------|
| Gaseous              | BA | AAAt | CCc  | 6.48 | 9.99  |
| Gaseous (Dispersion) | BA | AAAt | AAAt | 6.45 | 10.00 |
| Water                | BA | AAAt | AAAt | 5.03 | 5.50  |
| Water (Dispersion)   | BA | AAAt | AAAt | 4.99 | 5.50  |
| THF                  | BA | AAAt | AAAt | 5.23 | 6.16  |
| THF (Dispersion)     | BA | AAAt | AAAt | 5.19 | 6.16  |

**N12**

|                      |    |      |      |      |      |
|----------------------|----|------|------|------|------|
| Gaseous              | BA | AAAt | AAAt | 6.36 | 9.82 |
| Gaseous (Dispersion) | BA | AAAt | AAAt | 6.31 | 9.83 |
| Water                | BA | AAAt | AAAt | 4.91 | 5.30 |
| Water (Dispersion)   | BA | AAAt | AAAt | 4.86 | 5.31 |
| THF                  | BA | AAAt | AAAt | 5.11 | 5.93 |
| THF (Dispersion)     | BA | AAAt | AAAt | 5.06 | 5.97 |

---

## Computational Section continued for N13 – N16

**Table S10** Results of *ab initio* MO Calculations performed on **N13-N16** evaluated at the B3LYP/6-31+G\* level using X-ray and fully optimised geometries.

| Compound                                                                                     | X...Y Expt. | (WBI) | X...Y Calc. | (WBI) |
|----------------------------------------------------------------------------------------------|-------------|-------|-------------|-------|
| 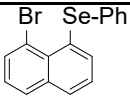 <b>N13</b> | 3.114       | 0.05  | 3.172       | 0.05  |
|  <b>N13</b> | 3.252       | 0.06  | 3.336       | 0.05  |
|  <b>N15</b> | 3.191       | 0.07  | 3.266       | 0.07  |
|  <b>N16</b> | 3.426       | 0.08  | 3.427       | 0.08  |

To try and assess the possibility of direct X...E bonding interactions that would indicate an onset of 3c-4e bonding, density functional theory computations were performed for derivatives **N13-N16** at the B3LYP/6-31+G\* level. The Wiberg bond index (WBI), which measures the covalent bond order, was calculated and increased from 0.05 for **5** to 0.08 for **8**, but indicates a very minor interaction taking place between the non-bonded atoms in these compounds (Table S10). For comparison, the fully covalent S-S single bond in naphtho(1,8-cd)(1,2-dithiole) has a WBI of 0.99 at the same level.

These results illustrate that more pronounced interactions could be expected as the neighbouring atoms become larger. Even stronger interactions can occur when one of the Se atoms carries an acceptor and indeed, when the "equatorial" Ph group on Se1 in 1,8-bis(phenylselanyl)naphthalene is replaced with Br, Se-Se distances as short as 2.516 Å have been observed. A B3LYP computation for the latter molecule from the X-ray structure affords a WBI of 0.55, suggesting a large extent of 3c-4e bonding in this case. Judging from the refined halogen-chalcogen distances, none of the species in the present study comes close to such a bonding situation.

### Naph((E)PPh<sub>2</sub>)(ER) compounds including N17

To try and assess the possibility of direct P...Se and E(2)...Se bonding interactions that would indicate an onset of 3c-4e bonding, density functional theory computations were performed for derivatives **N17** and **O,S** analogues at the B3LYP/6-31+G\* level. For each compound both linear type arrangements [E(2)...E(1)-C and E(1)...P-C] were evaluated (Figure S29). The Wiberg bond index (WBI), which measures the covalent bond order, was calculated for each linear arrangement, both for the structures found in the solid and for the minima resulting from full geometry optimisations in the gas phase. WBI values of 0.02-0.04 are obtained throughout, indicating a very minor interaction between non-bonded atoms in these compounds. For comparison, the fully covalent S-S single bond in naphtho(1,8-cd)(1,2-dithiole) has a WBI of 0.99 at the same level. For **3S** and **3Se**, the aromatic  $\pi$ -stacking between phenyl groups at P and the chalcogen that is found in the solid is lost upon optimisation (due to the missing dispersion interaction at that level), but this affects the computed WBIs only slightly. When the "equatorial" Ph group on Se(1) in 1,8-bis(phenylselanyl)naphthalene is replaced with Br, Se-Se distances as short as 2.516 Å have been observed. A B3LYP computation for the latter molecule from the X-ray structure affords a WBI of 0.55, suggesting a large extent of 3c-4e bonding in this case. Judging from the refined

phosphorus-chalcogen and chalcogen-chalcogen distances, none of the species in the present study comes close to such a bonding situation.

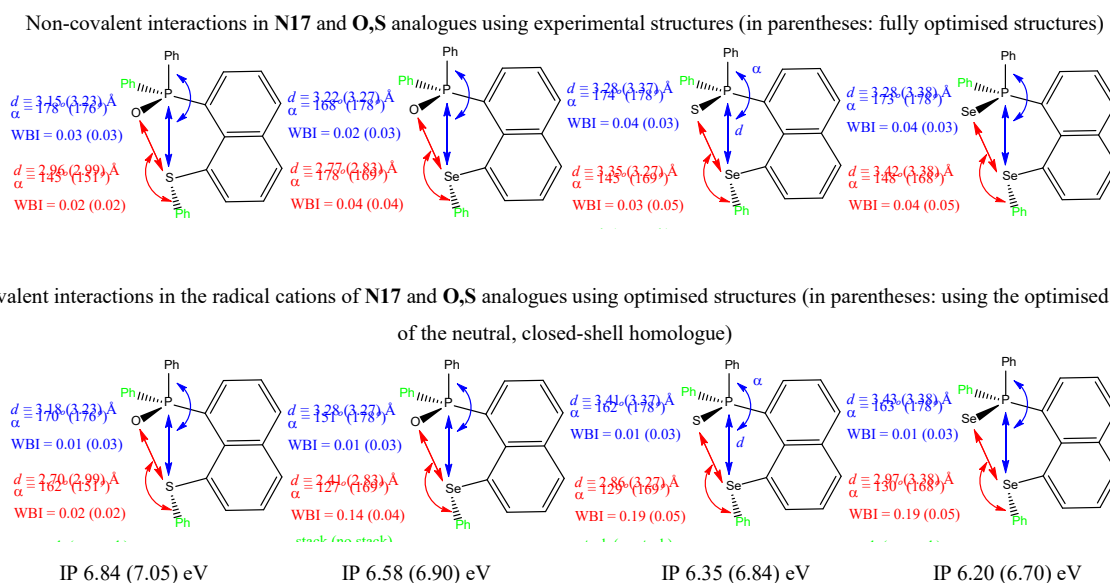

**Figure S29** DFT calculations performed on chalcogenides **N17** and **O,S** analogous, and their radical cations (B3LYP/6-31+G\* level).

Further calculations were performed on the radical cations of chalcogenides **20**, **30**, **3S**, and **3Se** (Figure 13). Whilst the Wiberg bond index values for the phosphorus-chalcogen interactions showed little change, the values for the E(2)···Se(1) interaction in the radical cations of selenium compounds **30**, **3S**, and **3Se** increased to 0.14-0.19 indicating a greater interaction compared to the neutral species. This increase is a consequence of the nature of the HOMO in the latter species, which consists essentially of p-orbitals on E(2) and Se(1) in an antibonding combination (see Figure S30 for **3Se**). As MOs with the corresponding bonding combination are lower in energy, removal of an electron from the HOMO increases the net bond order between these atoms. No similar increase was observed for the O(1)···S(1) interaction in **20** upon oxidation.

For each of the radical cations the adiabatic and vertical ionisation potentials were calculated. The values of 6.84-6.20 and 7.05-6.70 eV, respectively (Figure S30), are comparable to those of the known compound naphtho[1,8-*cd*]-1,2-dithiole, which has adiabatic and vertical IP values of 7.82 and 8.03 eV, respectively, computed at the same level. From previous unpublished work from the Woollins group it was shown that naphtho[1,8-*cd*]-1,2-dithiole can undergo one-electron oxidation and forms crystals of  $[\text{C}_{10}\text{H}_6\text{S}_2^+]_3[\text{BF}_4^-]_3$  using electrocrystallisation techniques. Judging from the computed IP values, the four chalcogenides **20**, **30**, **3S** and **3Se**, could exhibit similar electrochemical reactivity to naphtho[1,8-*cd*]-1,2-dithiole and may be able to form charge transfer compounds.

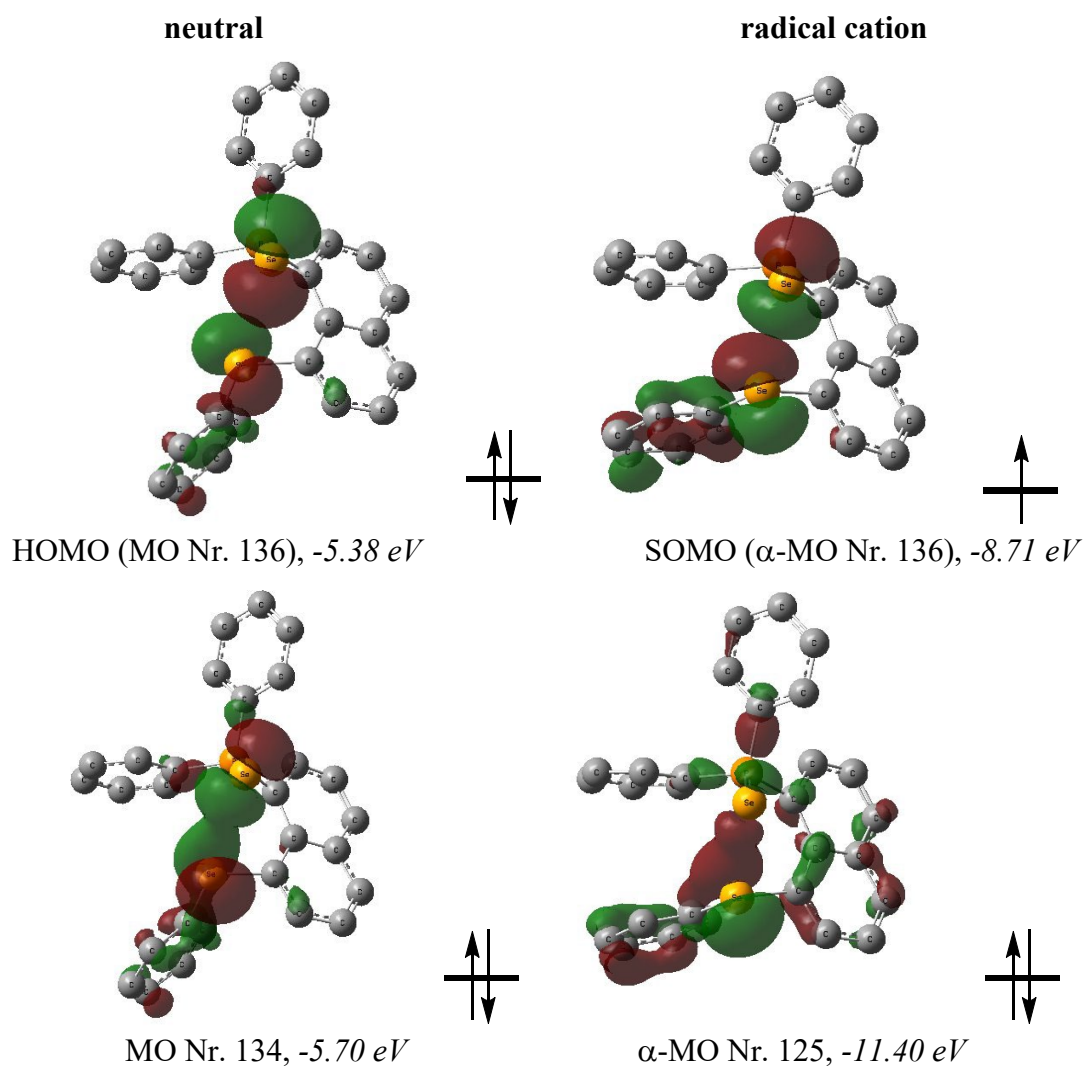

**Figure S30** Selected molecular orbitals of the neutral and radical cation species of **N17** (B3LYP level) showing bonding (bottom) and antibonding (top) combinations of p-orbitals on the Se atoms.

**Correlation of Wiberg Bond Indices to B3LYP-D3(BJ)/6-31+G(d) computed bond shortening**

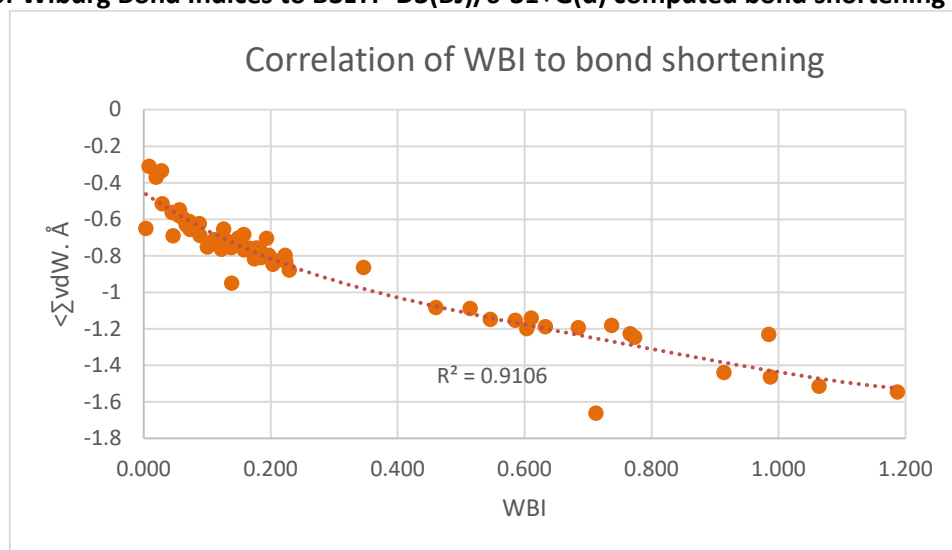

**Figure S31.** The degree of bond shortening expressed as  $d \langle \sum v dW \rangle$  for E,E in Å fits to a fourth-order polynomial.

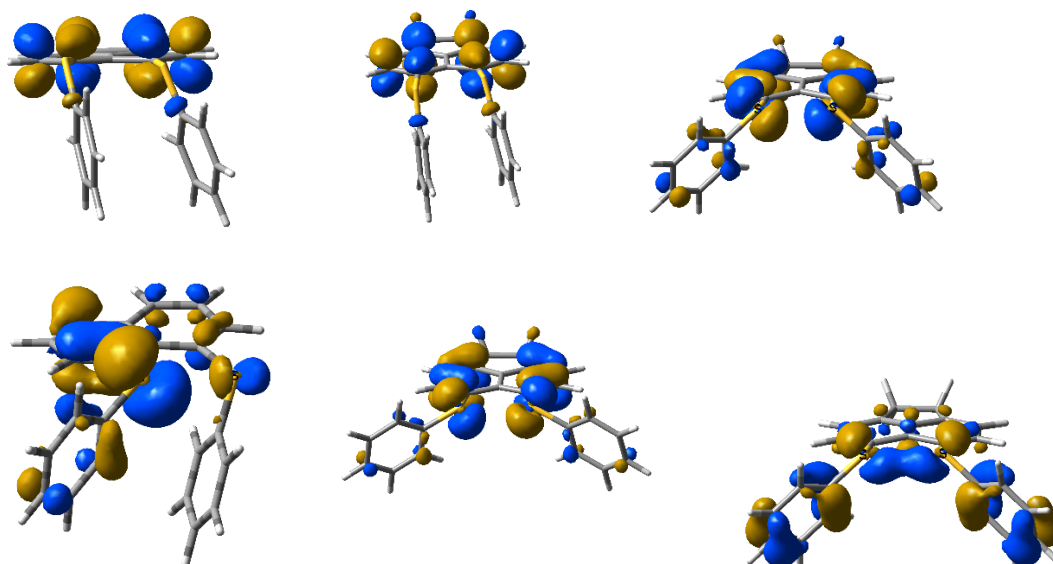

**Figure S32.** Molecular orbital diagrams of the HOMO (or SOMO) of the most stable **N1** conformers from neutral (left) to dication (right). A chalcogen-chalcogen interaction appears to be present at the HOMO for **N1**<sup>2+</sup>.

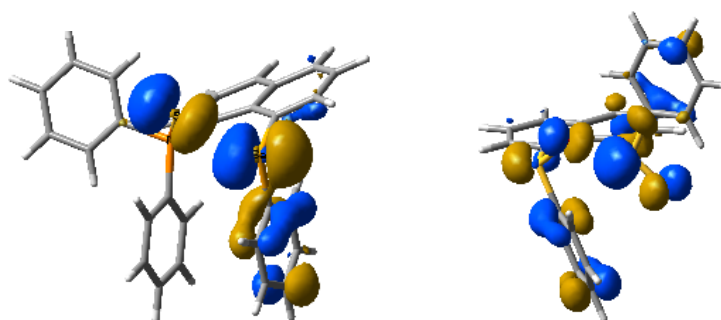

**Figure S33.** The SOMO of the monocations of **N17** and **N18**, the hemibond that develops by loss of the S\*.

**DFT modelling for neutral and oxidized N13 – N16** (centre rows in Fig. 5, main paper). For the mixed halogen (Br, I) and PhE (Se, Te) compounds, the neutral conformations are all computed at the B3LYP-D3(BJ)/6-31+G(d)/PCM(CH<sub>2</sub>Cl<sub>2</sub>) level of theory to be in a B conformation (Table 3), which is in full agreement with all four crystal structures (CSD Refcodes: CIKPIU,<sup>1</sup> CUZDOR, CUZDUX and CUSFAF).<sup>2</sup> Upon 1e oxidation, the DFT results predict a C conformation for **N13**<sup>•+</sup> and **N15**<sup>•+</sup> (X = Br) but an A conformation for **N14**<sup>•+</sup> and **N16**<sup>•+</sup> (X = I). For these compounds, conformation C is always geometrically closer to B than A. No clear reason for these preferences could be found, but significantly it is the two iodides that induce the A conformations, with its expectation of preferred sigma E...X bonding. The WBI values for **N14**<sup>•+</sup> (0.18) and **N16**<sup>•+</sup> (0.19) are indeed slightly higher than those of **N13**<sup>•+</sup> (0.07) and **N15**<sup>•+</sup> (0.05), respectively. Upon removal of a second electron to afford dications, three adopt C conformations quite similar to **N13**<sup>•+</sup> and **N15**<sup>•+</sup>, whereas in the case of **N16**<sup>2+</sup> (Te, I) there is a very clear preference for an A conformation. Evidently this favours Te–I  $\sigma$ -bond formation (WBI = 0.74).

**DFT modelling for the remaining species** (lowest two rows in Fig. 5, main article). The unsymmetrical PhSe/Ph<sub>2</sub>P=S *peri*-substituted compound **N17** represents an interesting P(V)/Se(II) mixed-oxidation state exemplar. The  $E_p^{a1}$  is in the middle of the measured ranges for all the compounds. The geometry optimizations for neutral **N17**, by all methods employed, afford structures very close to the AAC molecular conformation also obtained from the SC-XRD experiment (CSD refcode: MUXGOC;<sup>3</sup> here conformation is defined on *one* of the PPh<sub>2</sub> rings). There is considerable distortion out of the C<sub>10</sub>H<sub>6</sub> plane from steric constraints between the two large non-bonded substituents and the WBI of 0.03 indicates no bond between Se and P.<sup>3</sup> A dispersion-enhanced  $\pi$ -stacking interaction between the PhSe and one of the Ph<sub>2</sub>P rings is observed but the overlap is poor (closest centroid to plane distance is 3.41 Å). Upon oxidation to the monocation, an incipient interaction develops between Se and the S bonded to P by rotation of the substituents relative to each other and the Se/S WBI increases to 0.21, while the  $\pi$ -stacking interaction also improves (3.32 Å). Upon the second oxidation, rotation completes to afford a C<sub>3</sub>SeSP ring with an envelope conformation, and WBI values of 0.71 between Se and S with a bond length of 2.261 Å, whilst the P–S length has increased to 2.107 from 1.997 Å in the neutral molecule (a decrease in WBI from 1.32 to 0.97). The  $\pi$ -stacking interaction is also favourable in the dication ( $d_{C-P1} = 3.33$  Å). To our knowledge, there is no experimental evidence for the isolation of such a cyclic dication despite the favourable geometry prediction. However, a cyclic neutral acenaphthene derivative containing a C<sub>3</sub>Te<sub>2</sub>O ring of generally similar conformation has been structurally characterized (CSD refcode WARPIQ – see Chart 5).<sup>4</sup>

The S(IV)/S(IV) *peri*-substituted disulfoxide **18** is by far the most difficult species to oxidize from this study, as may be expected from the higher oxidation states of both chalcogens. The neutral compound optimizes in a geometry close to that found in the SC-XRD (CSD refcode: MUWWIL),<sup>3</sup> where the closest non-bonded distance between the two S atoms is 3.086 Å with a negligible WBI. Importantly, the DFT-computed HOMO is still of the chalcogen-LP type, indicating that the RMO remains substituent-centred, even though the redox potential exceeds that of naphthalene itself (see above). The conformation is approximately AAC but the phenyl rings are far apart. Upon one and two electron oxidations, rotation to an AAt conformation facilitates an S $\cdots$ O interaction, with  $d(S\cdots O) = 2.370$  Å (WBI 0.14) in the monocation and  $d(S-O) = 1.658$  Å (WBI 0.71). In the dication, the resultant C<sub>3</sub>SOS ring with envelope conformation resembles that predicted for **N17**<sup>2+</sup> (main article, Fig. 5), and similarly may be compared to the neutral acenaphthene C<sub>3</sub>Te<sub>2</sub>O ring in WARPIQ.<sup>3</sup> The AAt conformation which is induced to form this covalent ring prevents any dispersion interaction between phenyl groups.

#### **DFT modelling for N23, N23<sup>••</sup> and N23<sup>2+</sup>**

DFT Calculations on on **23**, **23<sup>••</sup>** and **23<sup>2+</sup>** to ascertain the origin of the small bond distance change on oxidation

| DFT Calculations on 23, 23 <sup>+</sup> and 23 <sup>2+</sup> |  |                  |                  |
|--------------------------------------------------------------|--|------------------|------------------|
| <b>Neutrals</b>                                              |  | E(RB3LYP) kJ.mol | D(S...S), Å      |
| N18-dithiole_B3LYPD3bj-631G+d-PCMdcn 0 im fr                 |  | -1181.13         | 0 2.13666        |
|                                                              |  |                  | 0                |
| Naph-SPhx2                                                   |  |                  | 3.21698          |
| Acen-SPhx2                                                   |  |                  | 3.29063          |
| <b>Moncation</b>                                             |  | E(RB3LYP) kJ.mol | D(S...S), Å      |
| N18-dithiole+1_B3LYPD3bj-631G+d-PCMd 0 im fr                 |  | -1180.94         | 517.1132 2.08613 |
|                                                              |  | IPa-I, eV        | 5.359424 2.4%    |
| Naph-SPhx2                                                   |  |                  | 2.87532          |
| Acen-SPhx2                                                   |  |                  | 2.94682          |
| <b>Dication</b>                                              |  | E(RB3LYP) kJ.mol | D(S...S), Å      |
| N18-dithiole2+_B3LYPD3bj-631G+d-PCMd 0 im fr                 |  | -1180.68         | 1187.267 2.05453 |
|                                                              |  | IPa-II, eV       | 12.30498 3.8%    |
| Naph-SPhx2                                                   |  |                  |                  |
| Acen-SPhx2                                                   |  |                  | 2.59686          |

  

|      |      |        |
|------|------|--------|
|      |      |        |
| LUMO | HOMO | Homo-8 |
|      |      |        |
| Lumo | Homo | Homo-7 |

### Pancake Bonding Analysis for [N23]BF<sub>4</sub>.

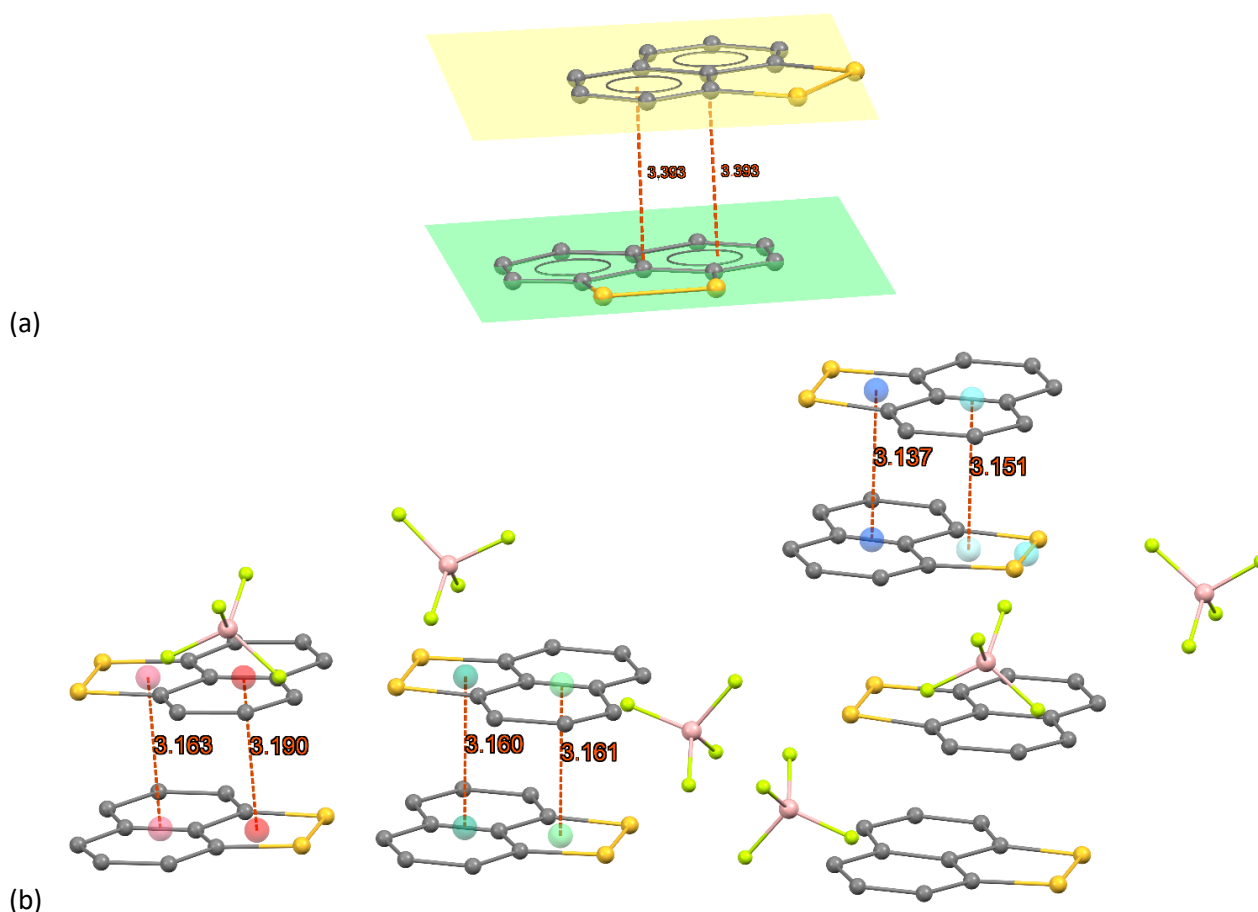

**Figure S34.** Experimental interplanar spacings in the crystal structures of (a) **N23** (DAQMUE) and (b) **[N23]BF<sub>4</sub>**.

The SC-XRD structures of both neutral **N23** and oxidized rings in **[N23]BF<sub>4</sub>** have co-planar layers of C<sub>10</sub>H<sub>6</sub>S<sub>2</sub> rings, indicating significant inter-annular attractions. But the association of the former at a mean interplanar separation of 3.393 Å is significantly longer than the average value for the three independent dimers in the salt of 3.160(16) Å. Within the latter, there are stacks of alternating short-long separations, as shown in Fig. S34b at the right, with the longer separation of 3.385 Å closely matched to that of the neutral



system. Even more telling than the metrical separations in the two structures, however, are the strong differences in the overlap orientations of the atomic  $p$ -orbital components of the ring  $\pi$ -MOs. Thus, in neutral **N23**, the  $\pi$ -HOMO, as computed in a gas-phase B3LYPD3(BJ)/6-31+G(d) calculation (Fig. S35), shows the two rings totally out of register, and the HOMO-1 is homologous but with the contributions of the two rings exchanged. The LUMO is recognizably a combination of the LUMOs of the monomers (main article, Fig. 9).

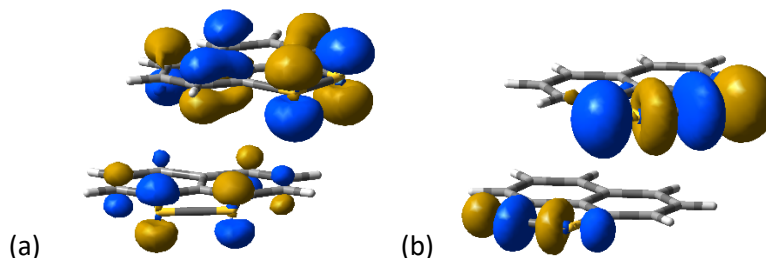

**Figure S35.** (a) Out-of-register  $\pi$ -HOMO in the conventional  $\pi$ -stacked geometry of neutral **N23** (Refcode: DAQMUE). (b) LUMO of the same pair of stacked molecules.

In strong contrast, the closer-spaced dimers in the salt structure of  $[\mathbf{N23}]\text{BF}_4$  have the constituent atomic  $p$ -orbitals of the  $\pi$ -SOMOs in maximum overlap orientation (main article, Fig. 10). Using charge-compensated ion-pair models (discussed below), the interaction diagram shown in Fig. S36 can be computed, where two SOMOs, energy and topology shown at left of the diagram, can conceptually combine in- and out-of-phase to form the spin-paired SOMO-SOMO covalent bonding interaction. The question that needs to be answered, however, is to what extent that interaction contributes to the binding (i.e. to the closer spacing).

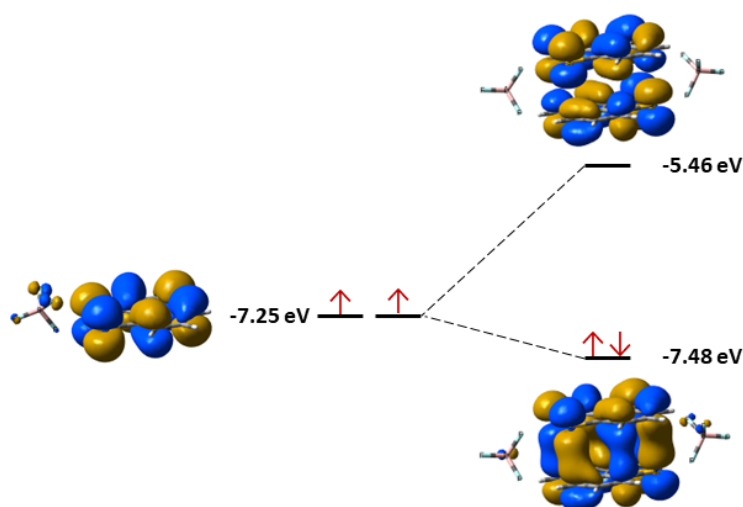

**Figure S36.** SOMO association by overlap in pancake-bonded dimer, with  $e$  pairing.

Following Cui *et al.*,<sup>5</sup> who have developed detailed models for the dimerization of TCNE $^{\bullet-}$  radical ions using high-level wavefunction theory (MR-AQCC) in an attempt to overcome the effects of Coulombic forces, we have also calculated two models, first an ‘equatorial’ model by optimizing a dimer plus two associated  $\text{BF}_4^-$  ions that are found at shortest separation to the sulfur atoms of the two radical cations, i.e. by optimizing charge-compensated ion pairs (Fig. S37a). Just as in the equatorial KTCNE radical ion pair, this form of association is still expected to have a significant Coulombic energy contribution (mutual attraction of two cation radicals to each of the anions, and repulsion expected to be strong between the cations and weaker between the anions, given the  $1/r$  scaling of Coulombic energy. To improve on this, a second ‘axial’ model

was also developed where the anions are moved to above and below the cation dimer *which no longer corresponds to the crystal lattice*, but where the cross-coupling of the Coulombic attraction is minimized (Fig. S37c). Both models were optimized at our standard B3LYP-D3(BJ)/6-31+G(d) level of theory, albeit in a gas phase approximation, and the stability of the models checked by frequency calculations. In both models, the energy of the bound (singlet state) ion pairs are compared to single point calculations of the ion pairs (triplet state) separated to 10 Å by carrying the ‘associated’ anion with each cation (Fig. S37). Cui *et al.* scanned the separation distances in the K<sub>2</sub>TCNE<sub>2</sub> models, and show convincingly that any effects attributable to pancake bonding fall away by the time 6 Å is reached, so that 10 Å seems a safe separation to minimize all interactions, including Coulombic, between the two ion pairs.

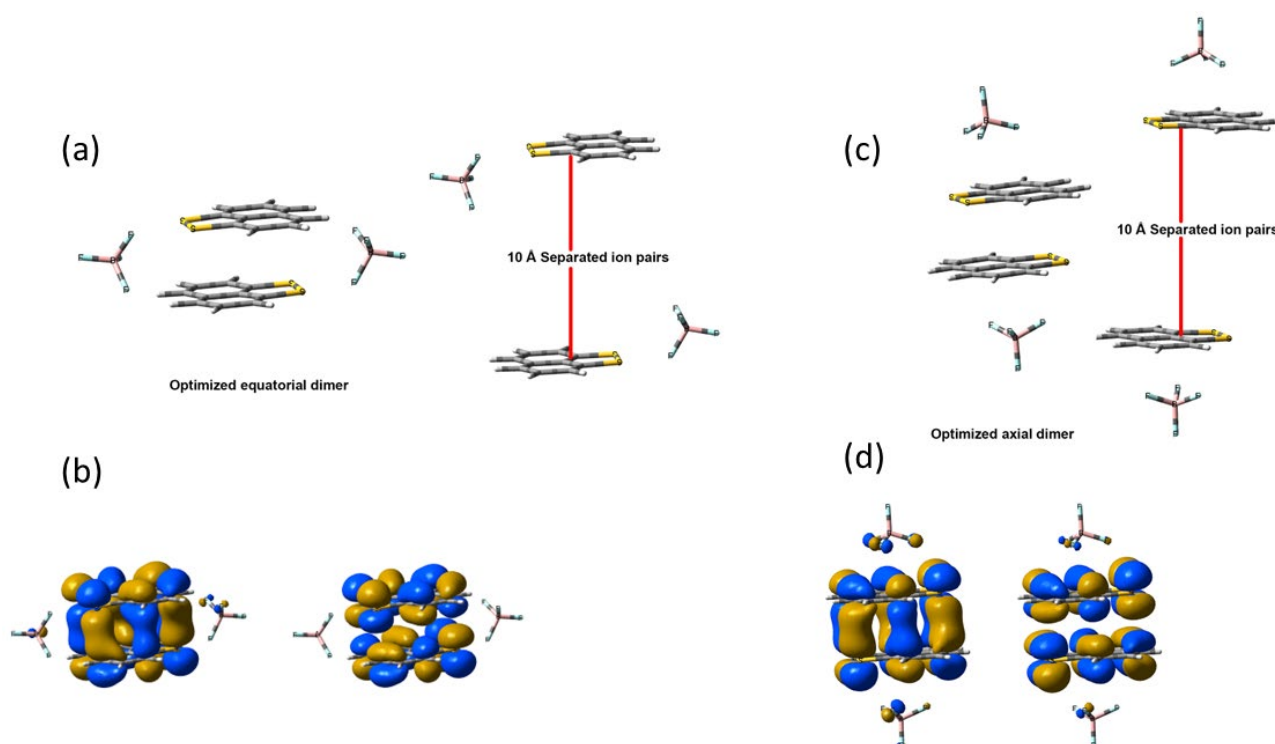

**Figure S37.** Geometries used for the gas-phase B3LYP-D3(BJ)/6-31+G(d) estimations of pancake bonding interaction energies for [(N23)BF<sub>4</sub>]<sub>2</sub> ion-pair dimers. (a) Equatorial model, with bound state at the optimized separation of radical cations of 3.158 Å and separated to 10.0 Å. (b) The singlet HOMO (left) and LUMO (right) of the equatorial dimer model. (c) Axial model, with optimized bound state separation of 3.167 Å and (d) separated to 10.0 Å. (d) The singlet HOMO (left) and LUMO (right) of the axial dimer model.

For the ‘equatorial’ case, the raw interaction energy is computed to be –205 kJ/mol, with a HOMO-LUMO gap of 2.0 eV for the optimized dimer. This interaction energy, more than 49 kcal/mol, far exceeds the 7–11.5 kcal/mol magnitude expected for single-electron SOMO pancake bonding interactions.<sup>5,6</sup> Satisfyingly, the interaction energy in the axial model reduces to –99 kJ/mol, with a HOMO-LUMO gap in this model dimer of a very similar 1.98 eV, and a singlet-triplet gap of about 50 kJ/mol, computed by re-optimizing the axial model in the triplet state, where the ion pairs separate to about 3.7 Å. A BSSE correction has not been undertaken on this (improved) model, but the interaction energy magnitude of 24 kcal/mol still seems

excessive, indicating that full compensation of the large Coulombic energy may not have occurred. In the optimized dimer.

Further calculations are not warranted at this time, as Mou *et al.* have demonstrated the necessity of calibrating DFT methods against high-level wavefunction methods before they can be reliably used for pancake bonding estimates,<sup>6</sup> and the [(**N23**)BF<sub>4</sub>]<sub>2</sub> system of cation radicals is intrinsically different from [KTCNE]<sub>2</sub>. There is therefore no evidence that our standard B3LYP-D3(BJ)/6-31+G(d) is reliable for investigations beyond these estimates. It is to be hoped that a full treatment of the dimers of **N23**<sup>•+</sup> and other related salts and charge transfer compounds from *peri*-substituted polycyclic aromatic hydrocarbons will be undertaken in due course.

#### Further References for the Computational Section

1. A. L. Fuller, F. R. Knight, A. M. Z. Slawin and J. D. Woollins, *Acta Crystallogr., Sect. E:Struct. Rep. Online*, 2007, **63**, o3855.
2. F. R. Knight, A. L. Fuller, M. Bühl, A. M. Z. Slawin, and J. D. Woollins, *Chem. Eur. J.*, 2010, **16**, 7605.
3. F. R. Knight, A. L. Fuller, M. Bühl, A. M. Z. Slawin, and J. D. Woollins, *Chem. Eur. J.*, 2010, **16**, 7617.
4. F. R. Knight, K. S. Athukorala Arachchige, R. A. M. Randall, M. Bühl, A. M. Z. Slawin and J. D. Woollins, *Dalton Trans.*, 2012, **41**, 3154.
5. Z-h. Cui, H. Lischka, T. Mueller, F. Plasser and M. Kertesz, *ChemPhysChem*, 2014, **15**, 165.
6. Z. Mou, Y-H. Tian and M. Kertesz, *Phys. Chem. Chem. Phys.*, 2017, **19**, 24761.

### Section 3: Additional Solution Phase EPR Spectra

Under similar conditions to those reported for  $A1^{2+}$  by chemical oxidation with  $NOBF_4$  in  $CH_2Cl_2$ .

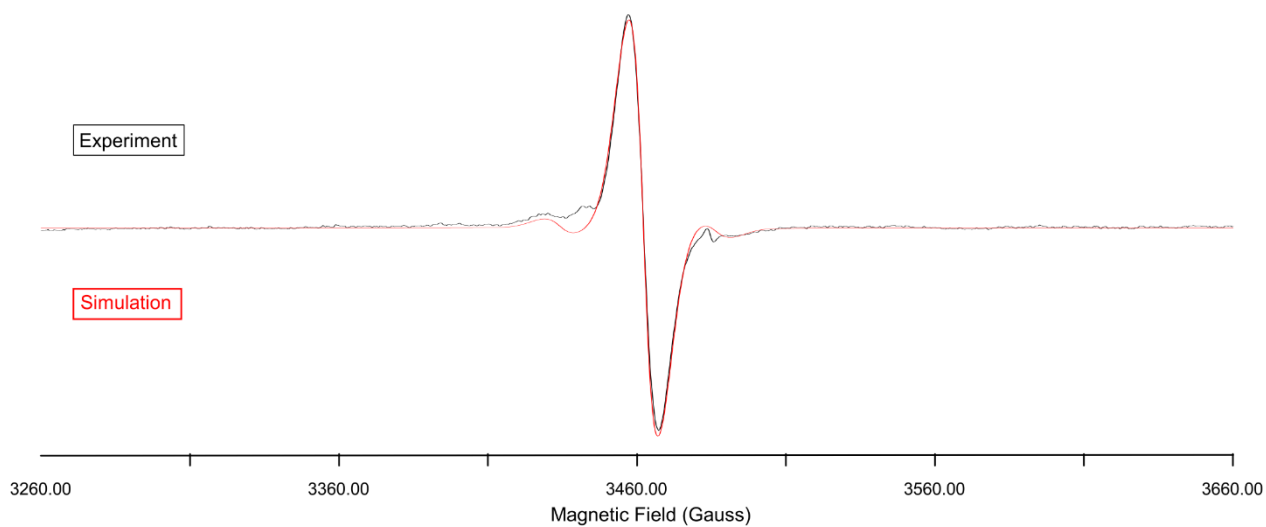

**Figure S38.** Solution EPR spectrum of  $A4^{2+}$

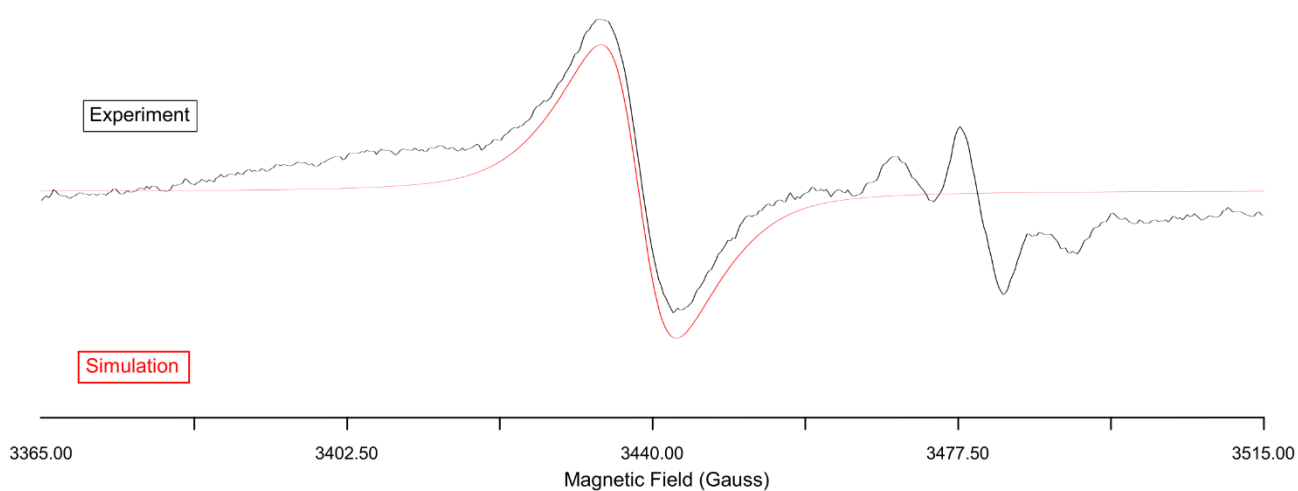

**Figure S39.** Solution EPR spectrum of  $A4^{2+}$

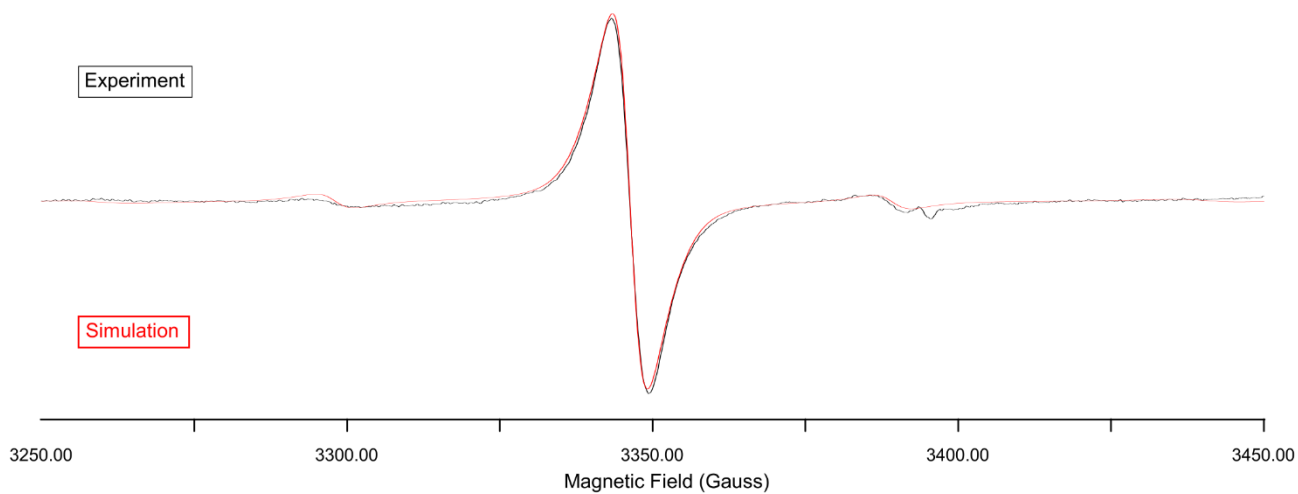

**Figure S40.** Sol Solution EPR spectrum of  $A4^{2+}$

## Section 4: Detailed Crystallographic information

### X-ray Crystallographic Structure determination on A19

#### Data Collection

A colorless platelet crystal of  $C_{25}H_{23}BF_4O_2St$  having approximate dimensions of 0.150 x 0.150 x 0.030 mm was mounted in a loop. All measurements were made on a Rigaku Saturn724 diffractometer Mo-Ka radiation.

Cell constants and an orientation matrix for data collection corresponded to a primitive triclinic cell with dimensions:

$$a = 11.7625(19) \text{ \AA} \quad a = 83.26(3)^\circ$$

$$b = 14.973(4) \text{ \AA} \quad b = 71.08(2)^\circ$$

$$c = 15.390(3) \text{ \AA} \quad g = 68.25(2)^\circ$$

$$V = 2381.4(10) \text{ \AA}^3$$

For  $Z = 4$  and F.W. = 601.92, the calculated density is  $1.679 \text{ g/cm}^3$ . Based on a statistical analysis of intensity distribution, and the successful solution and refinement of the structure, the space group was determined to be:

P-1 (#2)

The data were collected at a temperature of  $-148 \pm 1^\circ\text{C}$  to a maximum  $2\theta$  value of  $57.9^\circ$ .

#### Data Reduction

Of the 20303 reflections were collected, where 10339 were unique ( $R_{\text{int}} = 0.0847$ ); equivalent reflections were merged. Data were collected and processed using CrystalClear (Rigaku).<sup>1</sup>

The linear absorption coefficient,  $\mu$ , for Mo-Ka radiation is  $13.894 \text{ cm}^{-1}$ . An empirical absorption correction was applied which resulted in transmission factors ranging from 0.757 to 0.959. The data were corrected for Lorentz and polarization effects.

#### Structure Solution and Refinement

The structure was solved by direct methods<sup>2</sup> and expanded using Fourier techniques. The non-hydrogen atoms were refined anisotropically. Hydrogen atoms were refined using the riding model. The final cycle of full-matrix least-squares refinement<sup>3</sup> on  $F^2$  was based on 10339 observed reflections and 613 variable parameters and converged (largest parameter shift was 0.00 times its esd) with unweighted and weighted agreement factors of:

$$R1 = \sum ||F_o| - |F_c|| / \sum |F_o| = 0.0847$$

$$wR2 = [ \sum ( w (F_o^2 - F_c^2)^2 ) / \sum w(F_o^2)^2 ]^{1/2} = 0.2033$$

The goodness of fit<sup>4</sup> was 1.09. Unit weights were used. The maximum and minimum peaks on the final difference Fourier map corresponded to 1.14 and  $-1.49 \text{ e}^-/\text{\AA}^3$ , respectively.

Neutral atom scattering factors were taken from International Tables for Crystallography (IT), Vol. C, Table 6.1.1.4<sup>5</sup>. Anomalous dispersion effects were included in  $F_{\text{calc}}^6$ ; the values for  $D_f'$  and  $D_f''$  were those of Creagh and McAuley<sup>7</sup>. The values for the mass attenuation coefficients are those of Creagh and Hubbell<sup>8</sup>. All calculations were performed using the CrystalStructure<sup>9</sup> crystallographic software package except for refinement, which was performed using SHELXL Version 2018/3<sup>10</sup>.

Further refinement was undertaken with SHELXL within the Olex2 v. 1.5 suite.<sup>11</sup>

**Table 1 Crystal data and structure refinement for A19.**

|                                             |                                                                    |
|---------------------------------------------|--------------------------------------------------------------------|
| Identification code                         | A19                                                                |
| Empirical formula                           | C <sub>25</sub> H <sub>23</sub> BF <sub>4</sub> O <sub>2</sub> STe |
| Formula weight                              | 601.90                                                             |
| Temperature/K                               | 125.15                                                             |
| Crystal system                              | triclinic                                                          |
| Space group                                 | P-1                                                                |
| a/Å                                         | 11.7625(19)                                                        |
| b/Å                                         | 14.972(4)                                                          |
| c/Å                                         | 15.390(3)                                                          |
| α/°                                         | 83.26(3)                                                           |
| β/°                                         | 71.08(2)                                                           |
| γ/°                                         | 68.25(2)                                                           |
| Volume/Å <sup>3</sup>                       | 2381.4(10)                                                         |
| Z                                           | 4                                                                  |
| ρ <sub>calc</sub> /g/cm <sup>3</sup>        | 1.679                                                              |
| μ/mm <sup>-1</sup>                          | 1.389                                                              |
| F(000)                                      | 1192.0                                                             |
| Crystal size/mm <sup>3</sup>                | 0.15 × 0.15 × 0.03                                                 |
| Radiation                                   | MoKα (λ = 0.71075)                                                 |
| 2θ range for data collection/°              | 2.798 to 50.498                                                    |
| Index ranges                                | -14 ≤ h ≤ 14, -17 ≤ k ≤ 17, -18 ≤ l ≤ 18                           |
| Reflections collected                       | 18166                                                              |
| Independent reflections                     | 8545 [R <sub>int</sub> = 0.0839, R <sub>sigma</sub> = 0.1415]      |
| Data/restraints/parameters                  | 8545/506/619                                                       |
| Goodness-of-fit on F <sup>2</sup>           | 1.071                                                              |
| Final R indexes [I >= 2σ (I)]               | R <sub>1</sub> = 0.0758, wR <sub>2</sub> = 0.1447                  |
| Final R indexes [all data]                  | R <sub>1</sub> = 0.1284, wR <sub>2</sub> = 0.1740                  |
| Largest diff. peak/hole / e Å <sup>-3</sup> | 0.83/-1.22                                                         |

**Table 2 Fractional Atomic Coordinates (×10<sup>4</sup>) and Equivalent Isotropic Displacement Parameters (Å<sup>2</sup>×10<sup>3</sup>) for A19. U<sub>eq</sub> is defined as 1/3 of the trace of the orthogonalised U<sub>ij</sub> tensor.**

| Atom | x         | y          | z          | U(eq)    |
|------|-----------|------------|------------|----------|
| Te1  | 9873.8(6) | 8367.7(5)  | 3332.1(4)  | 43.1(2)  |
| Te2  | 4852.4(6) | 6913.3(5)  | 1746.0(4)  | 42.5(2)  |
| S1   | 8957(2)   | 7841.8(17) | 1998.7(17) | 40.7(6)  |
| S4   | 5987(2)   | 7388.1(17) | 2960.6(17) | 42.3(6)  |
| F1   | 2086(7)   | 2256(5)    | 5033(5)    | 117(3)   |
| F2   | 3057(7)   | 2940(6)    | 3828(5)    | 91(2)    |
| F3   | 1238(8)   | 3841(5)    | 4866(5)    | 93(2)    |
| F4   | 1192(7)   | 2862(5)    | 3905(6)    | 99(2)    |
| F5   | 1671(9)   | 2592(10)   | 833(6)     | 173(5)   |
| F6   | 2973(7)   | 2166(5)    | -553(5)    | 90(2)    |
| F7   | 3445(13)  | 1429(7)    | 644(9)     | 199(6)   |
| F8   | 3538(7)   | 2866(5)    | 335(5)     | 101(2)   |
| O1   | 10586(8)  | 8918(5)    | 4012(5)    | 72(2)    |
| O2   | 3858(7)   | 6454(5)    | 1201(4)    | 58.3(19) |
| O3   | 4664(10)  | 2821(8)    | 1946(8)    | 116(3)   |

**Table 2 Fractional Atomic Coordinates ( $\times 10^4$ ) and Equivalent Isotropic Displacement Parameters ( $\text{\AA}^2 \times 10^3$ ) for A19.  $U_{eq}$  is defined as 1/3 of the trace of the orthogonalised  $U_{ij}$  tensor.**

| Atom | <i>x</i>  | <i>y</i> | <i>z</i> | $U(eq)$ |
|------|-----------|----------|----------|---------|
| O4   | 212(9)    | 2070(8)  | 2687(7)  | 105(3)  |
| C1   | 11021(8)  | 8731(6)  | 2089(6)  | 38(2)   |
| C2   | 11962(9)  | 9085(7)  | 2094(7)  | 50(3)   |
| C3   | 12699(10) | 9381(7)  | 1282(7)  | 54(3)   |
| C4   | 12540(10) | 9308(7)  | 457(7)   | 50(2)   |
| C5   | 11608(9)  | 8956(6)  | 454(6)   | 39(2)   |
| C6   | 11518(10) | 8962(6)  | -442(7)  | 46(2)   |
| C7   | 10614(10) | 8685(6)  | -560(7)  | 48(2)   |
| C8   | 9790(9)   | 8350(6)  | 209(6)   | 43(2)   |
| C9   | 9921(8)   | 8315(6)  | 1073(6)  | 36(2)   |
| C10  | 10825(9)  | 8651(6)  | 1231(6)  | 38(2)   |
| C11  | 13176(10) | 9583(8)  | -499(7)  | 62(3)   |
| C12  | 12552(10) | 9299(7)  | -1131(7) | 60(3)   |
| C13  | 8267(9)   | 9640(7)  | 3449(6)  | 43(2)   |
| C14  | 8464(11)  | 10523(7) | 3261(7)  | 52(3)   |
| C15  | 7397(12)  | 11354(7) | 3354(7)  | 58(3)   |
| C16  | 6179(11)  | 11306(8) | 3644(7)  | 59(3)   |
| C17  | 5987(10)  | 10450(8) | 3847(7)  | 52(2)   |
| C18  | 7018(10)  | 9603(7)  | 3772(6)  | 47(2)   |
| C19  | 10688(11) | 8559(8)  | 4898(7)  | 60(3)   |
| C20  | 9977(9)   | 6585(6)  | 1976(7)  | 42(2)   |
| C21  | 10905(10) | 6147(7)  | 1178(7)  | 49(2)   |
| C22  | 11626(11) | 5180(7)  | 1213(8)  | 59(3)   |
| C23  | 11434(11) | 4672(8)  | 2030(8)  | 59(3)   |
| C24  | 10518(10) | 5121(8)  | 2819(8)  | 58(3)   |
| C25  | 9768(9)   | 6095(7)  | 2803(7)  | 48(2)   |
| C31  | 3791(9)   | 6557(6)  | 3060(6)  | 40(2)   |
| C32  | 2804(9)   | 6248(7)  | 3126(7)  | 47(2)   |
| C33  | 2111(9)   | 5925(7)  | 3984(7)  | 53(3)   |
| C34  | 2506(9)   | 5900(7)  | 4728(7)  | 44(2)   |
| C35  | 3524(9)   | 6193(6)  | 4654(6)  | 39(2)   |
| C36  | 3825(10)  | 6111(6)  | 5468(6)  | 44(2)   |
| C37  | 4843(10)  | 6324(6)  | 5516(7)  | 46(2)   |
| C38  | 5525(10)  | 6685(6)  | 4714(7)  | 47(2)   |
| C39  | 5210(8)   | 6821(6)  | 3892(6)  | 37(2)   |
| C40  | 4207(9)   | 6540(6)  | 3826(6)  | 37(2)   |
| C41  | 2016(10)  | 5591(7)  | 5706(7)  | 58(3)   |
| C42  | 2881(11)  | 5746(7)  | 6200(7)  | 60(3)   |
| C43  | 6423(9)   | 5576(6)  | 1546(6)  | 37(2)   |
| C44  | 6145(10)  | 4744(7)  | 1648(7)  | 49(2)   |
| C45  | 7160(11)  | 3877(7)  | 1515(7)  | 58(3)   |
| C46  | 8371(11)  | 3841(8)  | 1325(7)  | 58(3)   |
| C47  | 8673(11)  | 4677(8)  | 1217(7)  | 57(3)   |
| C48  | 7658(9)   | 5565(7)  | 1337(7)  | 48(2)   |
| C49  | 4114(11)  | 6491(9)  | 239(7)   | 71(4)   |

**Table 2 Fractional Atomic Coordinates ( $\times 10^4$ ) and Equivalent Isotropic Displacement Parameters ( $\text{\AA}^2 \times 10^3$ ) for A19.  $U_{eq}$  is defined as 1/3 of the trace of the orthogonalised  $U_{ij}$  tensor.**

| Atom | x        | y        | z        | U(eq) |
|------|----------|----------|----------|-------|
| C50  | 4881(9)  | 8593(6)  | 3119(7)  | 41(2) |
| C51  | 3867(9)  | 8925(7)  | 3889(7)  | 45(2) |
| C52  | 3017(10) | 9872(7)  | 3962(7)  | 50(2) |
| C53  | 3222(10) | 10496(7) | 3250(7)  | 46(2) |
| C54  | 4294(11) | 10178(8) | 2471(7)  | 57(3) |
| C55  | 5081(10) | 9243(7)  | 2405(7)  | 48(2) |
| B1   | 1877(13) | 2967(10) | 4443(10) | 57(3) |
| B2   | 2945(15) | 2235(12) | 334(10)  | 71(3) |

**Table 3 Anisotropic Displacement Parameters ( $\text{\AA}^2 \times 10^3$ ) for A19. The Anisotropic displacement factor exponent takes the form:  $-2\pi^2[h^2a^*U_{11}+2hka^*b^*U_{12}+\dots]$ .**

| Atom | $U_{11}$ | $U_{22}$ | $U_{33}$ | $U_{23}$ | $U_{13}$  | $U_{12}$  |
|------|----------|----------|----------|----------|-----------|-----------|
| Te1  | 55.6(5)  | 44.4(4)  | 39.2(4)  | 5.9(3)   | -20.2(3)  | -25.3(4)  |
| Te2  | 49.1(4)  | 43.8(4)  | 39.2(4)  | 1.3(3)   | -16.3(3)  | -19.4(3)  |
| S1   | 43.1(15) | 41.1(14) | 41.4(14) | -0.8(12) | -11.9(12) | -19.2(12) |
| S4   | 41.4(15) | 44.6(15) | 44.3(14) | -4.9(12) | -12.2(12) | -18.4(13) |
| F1   | 103(6)   | 93(5)    | 100(6)   | 46(5)    | -8(5)     | -6(5)     |
| F2   | 74(5)    | 126(6)   | 72(5)    | -5(4)    | -9(4)     | -45(5)    |
| F3   | 124(6)   | 67(4)    | 75(5)    | -15(4)   | -16(4)    | -27(4)    |
| F4   | 99(6)    | 79(5)    | 141(7)   | -17(5)   | -66(5)    | -23(4)    |
| F5   | 95(6)    | 332(14)  | 114(7)   | -106(8)  | 18(5)     | -109(7)   |
| F6   | 111(6)   | 108(6)   | 59(4)    | -3(4)    | -14(4)    | -59(5)    |
| F7   | 290(13)  | 130(8)   | 266(14)  | 124(9)   | -200(12)  | -111(8)   |
| F8   | 113(6)   | 109(6)   | 102(6)   | -27(5)   | -11(5)    | -74(5)    |
| O1   | 114(7)   | 92(6)    | 53(4)    | 21(4)    | -52(5)    | -68(5)    |
| O2   | 71(5)    | 80(5)    | 39(4)    | 4(4)     | -25(4)    | -37(4)    |
| O3   | 112(5)   | 121(5)   | 115(5)   | 0(3)     | -38(4)    | -37(3)    |
| O4   | 100(4)   | 108(4)   | 105(4)   | 12(3)    | -33(3)    | -38(3)    |
| C1   | 39(5)    | 34(5)    | 47(5)    | 6(4)     | -19(4)    | -16(4)    |
| C2   | 52(6)    | 58(6)    | 54(6)    | 20(5)    | -32(5)    | -29(5)    |
| C3   | 50(6)    | 56(7)    | 65(5)    | 9(6)     | -19(5)    | -31(6)    |
| C4   | 49(6)    | 40(6)    | 53(5)    | 5(5)     | -8(5)     | -15(5)    |
| C5   | 45(5)    | 28(5)    | 42(4)    | 1(4)     | -13(4)    | -9(4)     |
| C6   | 61(6)    | 28(5)    | 45(5)    | 5(5)     | -13(5)    | -14(5)    |
| C7   | 61(6)    | 33(5)    | 49(5)    | 6(5)     | -24(5)    | -11(5)    |
| C8   | 50(6)    | 41(6)    | 45(5)    | -4(5)    | -22(4)    | -15(5)    |
| C9   | 38(5)    | 27(5)    | 43(5)    | -2(4)    | -15(4)    | -8(4)     |
| C10  | 48(5)    | 25(5)    | 44(4)    | 8(4)     | -23(4)    | -11(4)    |
| C11  | 54(7)    | 52(7)    | 65(6)    | 8(6)     | 1(5)      | -21(6)    |
| C12  | 67(7)    | 46(6)    | 51(6)    | 9(5)     | -3(5)     | -18(6)    |
| C13  | 56(5)    | 41(5)    | 29(5)    | -3(4)    | -10(4)    | -16(5)    |
| C14  | 68(6)    | 46(5)    | 50(6)    | 3(5)     | -19(6)    | -29(5)    |
| C15  | 89(7)    | 40(5)    | 48(6)    | -9(5)    | -15(6)    | -27(5)    |
| C16  | 74(7)    | 55(6)    | 47(6)    | -8(5)    | -21(6)    | -16(6)    |
| C17  | 56(6)    | 61(6)    | 45(6)    | -8(5)    | -20(5)    | -20(5)    |
| C18  | 57(5)    | 55(5)    | 37(5)    | -4(5)    | -15(5)    | -28(5)    |



**Table 3 Anisotropic Displacement Parameters ( $\text{\AA}^2 \times 10^3$ ) for A19. The Anisotropic displacement factor exponent takes the form:  $-2\pi^2[h^2a^*2U_{11}+2hka^*b^*U_{12}+\dots]$ .**

| Atom | $U_{11}$ | $U_{22}$ | $U_{33}$ | $U_{23}$ | $U_{13}$ | $U_{12}$ |
|------|----------|----------|----------|----------|----------|----------|
| C19  | 76(8)    | 66(7)    | 42(6)    | -9(5)    | -26(6)   | -21(6)   |
| C20  | 56(6)    | 37(5)    | 44(5)    | 1(4)     | -20(4)   | -24(5)   |
| C21  | 65(7)    | 42(5)    | 41(5)    | -3(4)    | -22(5)   | -15(5)   |
| C22  | 67(7)    | 43(5)    | 62(6)    | -5(5)    | -22(6)   | -12(5)   |
| C23  | 67(7)    | 41(6)    | 78(7)    | 10(5)    | -32(5)   | -24(5)   |
| C24  | 53(7)    | 53(6)    | 75(7)    | 22(5)    | -24(5)   | -30(5)   |
| C25  | 41(6)    | 49(5)    | 56(6)    | 10(5)    | -8(5)    | -27(5)   |
| C31  | 44(5)    | 38(5)    | 46(5)    | 3(4)     | -24(4)   | -14(4)   |
| C32  | 43(6)    | 50(6)    | 48(5)    | 11(5)    | -19(5)   | -16(5)   |
| C33  | 43(6)    | 56(7)    | 61(6)    | 19(5)    | -21(5)   | -19(5)   |
| C34  | 33(5)    | 40(5)    | 54(5)    | 10(5)    | -14(4)   | -9(4)    |
| C35  | 44(5)    | 28(5)    | 42(4)    | -2(4)    | -15(4)   | -9(4)    |
| C36  | 57(6)    | 26(5)    | 40(5)    | 2(4)     | -14(4)   | -4(4)    |
| C37  | 68(6)    | 28(5)    | 41(5)    | -5(4)    | -29(5)   | -3(5)    |
| C38  | 63(6)    | 37(5)    | 51(5)    | -9(5)    | -29(5)   | -16(5)   |
| C39  | 36(5)    | 37(5)    | 38(5)    | -4(4)    | -15(4)   | -9(4)    |
| C40  | 41(5)    | 32(5)    | 39(4)    | -3(4)    | -15(4)   | -9(4)    |
| C41  | 66(7)    | 40(6)    | 52(6)    | 5(5)     | 0(5)     | -18(5)   |
| C42  | 86(8)    | 42(6)    | 39(5)    | 0(5)     | -4(5)    | -23(6)   |
| C43  | 57(5)    | 28(4)    | 33(5)    | -5(4)    | -19(4)   | -15(4)   |
| C44  | 61(6)    | 44(5)    | 49(6)    | -7(5)    | -15(5)   | -26(4)   |
| C45  | 80(6)    | 39(5)    | 52(7)    | -5(5)    | -19(6)   | -16(5)   |
| C46  | 71(6)    | 49(6)    | 52(7)    | -2(5)    | -35(6)   | -5(5)    |
| C47  | 58(6)    | 58(6)    | 44(6)    | -6(5)    | -14(5)   | -6(5)    |
| C48  | 53(5)    | 45(5)    | 48(6)    | -5(5)    | -18(5)   | -17(4)   |
| C49  | 83(9)    | 102(10)  | 40(5)    | 10(7)    | -30(6)   | -40(8)   |
| C50  | 39(5)    | 38(5)    | 44(5)    | -7(4)    | -8(4)    | -14(4)   |
| C51  | 47(6)    | 50(5)    | 39(5)    | -6(4)    | -16(4)   | -14(4)   |
| C52  | 50(6)    | 42(5)    | 51(6)    | -4(4)    | -11(5)   | -10(4)   |
| C53  | 60(6)    | 42(5)    | 48(5)    | -1(4)    | -27(4)   | -23(5)   |
| C54  | 78(7)    | 49(5)    | 46(6)    | 2(5)     | -18(5)   | -25(5)   |
| C55  | 48(6)    | 52(5)    | 51(6)    | 2(5)     | -15(5)   | -26(5)   |
| B1   | 58(7)    | 52(6)    | 64(8)    | -6(5)    | -14(5)   | -24(6)   |
| B2   | 82(7)    | 92(9)    | 66(7)    | 35(8)    | -35(6)   | -61(7)   |

**Table 4 Bond Lengths for A19.**

| Atom | Atom | Length/ $\text{\AA}$ | Atom | Atom | Length/ $\text{\AA}$ |
|------|------|----------------------|------|------|----------------------|
| Te1  | O1   | 1.939(6)             | C19  | H19C | 0.9800               |
| Te1  | C1   | 2.099(9)             | C20  | C21  | 1.385(13)            |
| Te1  | C13  | 2.103(10)            | C20  | C25  | 1.390(12)            |
| Te2  | O2   | 1.978(6)             | C21  | H21  | 0.9500               |
| Te2  | C31  | 2.130(9)             | C21  | C22  | 1.384(13)            |
| Te2  | C43  | 2.133(9)             | C22  | H22  | 0.9500               |
| S1   | C9   | 1.768(9)             | C22  | C23  | 1.390(14)            |
| S1   | C20  | 1.815(10)            | C23  | H23  | 0.9500               |
| S4   | C39  | 1.747(9)             | C23  | C24  | 1.376(15)            |

**Table 4 Bond Lengths for A19.**

| Atom Atom Length/Å |      |           | Atom Atom Length/Å |      |           |
|--------------------|------|-----------|--------------------|------|-----------|
| S4                 | C50  | 1.779(10) | C24                | H24  | 0.9500    |
| F1                 | B1   | 1.320(14) | C24                | C25  | 1.399(13) |
| F2                 | B1   | 1.393(14) | C25                | H25  | 0.9500    |
| F3                 | B1   | 1.362(15) | C31                | C32  | 1.371(12) |
| F4                 | B1   | 1.386(14) | C31                | C40  | 1.410(11) |
| F5                 | B2   | 1.371(17) | C32                | H32  | 0.9500    |
| F6                 | B2   | 1.371(15) | C32                | C33  | 1.445(13) |
| F7                 | B2   | 1.244(15) | C33                | H33  | 0.9500    |
| F8                 | B2   | 1.367(14) | C33                | C34  | 1.360(13) |
| O1                 | C19  | 1.432(10) | C34                | C35  | 1.388(12) |
| O2                 | C49  | 1.411(11) | C34                | C41  | 1.511(13) |
| O3                 | H3A  | 0.9796    | C35                | C36  | 1.390(12) |
| O3                 | H3B  | 0.8699    | C35                | C40  | 1.424(12) |
| O4                 | H4A  | 0.8701    | C36                | C37  | 1.374(13) |
| O4                 | H4B  | 0.8699    | C36                | C42  | 1.514(13) |
| C1                 | C2   | 1.395(11) | C37                | H37  | 0.9500    |
| C1                 | C10  | 1.436(12) | C37                | C38  | 1.408(13) |
| C2                 | H2   | 0.9500    | C38                | H38  | 0.9500    |
| C2                 | C3   | 1.401(13) | C38                | C39  | 1.402(11) |
| C3                 | H3   | 0.9500    | C39                | C40  | 1.426(11) |
| C3                 | C4   | 1.364(13) | C41                | H41A | 0.9900    |
| C4                 | C5   | 1.382(13) | C41                | H41B | 0.9900    |
| C4                 | C11  | 1.507(13) | C41                | C42  | 1.545(14) |
| C5                 | C6   | 1.416(12) | C42                | H42A | 0.9900    |
| C5                 | C10  | 1.399(12) | C42                | H42B | 0.9900    |
| C6                 | C7   | 1.344(12) | C43                | C44  | 1.382(12) |
| C6                 | C12  | 1.533(13) | C43                | C48  | 1.376(12) |
| C7                 | H7   | 0.9500    | C44                | H44  | 0.9500    |
| C7                 | C8   | 1.438(13) | C44                | C45  | 1.380(13) |
| C8                 | H8   | 0.9500    | C45                | H45  | 0.9500    |
| C8                 | C9   | 1.381(11) | C45                | C46  | 1.339(14) |
| C9                 | C10  | 1.427(11) | C46                | H46  | 0.9500    |
| C11                | H11A | 0.9900    | C46                | C47  | 1.402(14) |
| C11                | H11B | 0.9900    | C47                | H47  | 0.9500    |
| C11                | C12  | 1.567(14) | C47                | C48  | 1.402(13) |
| C12                | H12A | 0.9900    | C48                | H48  | 0.9500    |
| C12                | H12B | 0.9900    | C49                | H49A | 0.9800    |
| C13                | C14  | 1.407(12) | C49                | H49B | 0.9800    |
| C13                | C18  | 1.410(13) | C49                | H49C | 0.9800    |
| C14                | H14  | 0.9500    | C50                | C51  | 1.362(13) |
| C14                | C15  | 1.382(14) | C50                | C55  | 1.400(12) |
| C15                | H15  | 0.9500    | C51                | H51  | 0.9500    |
| C15                | C16  | 1.382(14) | C51                | C52  | 1.392(13) |
| C16                | H16  | 0.9500    | C52                | H52  | 0.9500    |
| C16                | C17  | 1.366(13) | C52                | C53  | 1.373(12) |
| C17                | H17  | 0.9500    | C53                | H53  | 0.9500    |

**Table 4 Bond Lengths for A19.**

| Atom Atom Length/Å |      |           | Atom Atom Length/Å |     |           |
|--------------------|------|-----------|--------------------|-----|-----------|
| C17                | C18  | 1.377(13) | C53                | C54 | 1.401(14) |
| C18                | H18  | 0.9500    | C54                | H54 | 0.9500    |
| C19                | H19A | 0.9800    | C54                | C55 | 1.356(13) |
| C19                | H19B | 0.9800    | C55                | H55 | 0.9500    |

**Table 5 Bond Angles for A19.**

| Atom Atom Atom Angle/° |     |     |           | Atom Atom Atom Angle/° |     |     |           |
|------------------------|-----|-----|-----------|------------------------|-----|-----|-----------|
| O1                     | Te1 | C1  | 90.3(3)   | C32                    | C31 | C40 | 121.2(8)  |
| O1                     | Te1 | C13 | 92.1(4)   | C40                    | C31 | Te2 | 119.2(6)  |
| C1                     | Te1 | C13 | 95.9(3)   | C31                    | C32 | C33 | 122.0(9)  |
| O2                     | Te2 | C31 | 88.1(3)   | C34                    | C33 | C32 | 117.4(9)  |
| O2                     | Te2 | C43 | 94.0(3)   | C33                    | C34 | C35 | 120.3(9)  |
| C31                    | Te2 | C43 | 95.3(3)   | C33                    | C34 | C41 | 130.9(9)  |
| C9                     | S1  | C20 | 101.8(4)  | C35                    | C34 | C41 | 108.8(8)  |
| C39                    | S4  | C50 | 101.0(4)  | C34                    | C35 | C36 | 113.5(8)  |
| C19                    | O1  | Te1 | 121.0(6)  | C34                    | C35 | C40 | 123.8(8)  |
| C49                    | O2  | Te2 | 118.8(6)  | C36                    | C35 | C40 | 122.7(8)  |
| C2                     | C1  | Te1 | 119.8(7)  | C35                    | C36 | C42 | 107.9(9)  |
| C2                     | C1  | C10 | 119.3(8)  | C37                    | C36 | C35 | 121.8(9)  |
| C10                    | C1  | Te1 | 120.9(6)  | C37                    | C36 | C42 | 130.3(9)  |
| C1                     | C2  | C3  | 121.2(9)  | C36                    | C37 | C38 | 116.9(8)  |
| C4                     | C3  | C2  | 120.7(9)  | C39                    | C38 | C37 | 122.8(9)  |
| C3                     | C4  | C5  | 117.9(9)  | C38                    | C39 | S4  | 120.3(7)  |
| C3                     | C4  | C11 | 131.5(10) | C38                    | C39 | C40 | 120.2(8)  |
| C5                     | C4  | C11 | 110.6(9)  | C40                    | C39 | S4  | 119.4(6)  |
| C4                     | C5  | C6  | 111.3(9)  | C31                    | C40 | C35 | 115.1(8)  |
| C4                     | C5  | C10 | 125.1(9)  | C31                    | C40 | C39 | 129.4(8)  |
| C10                    | C5  | C6  | 123.6(8)  | C35                    | C40 | C39 | 115.4(8)  |
| C5                     | C6  | C12 | 109.6(9)  | C34                    | C41 | C42 | 104.4(8)  |
| C7                     | C6  | C5  | 119.0(9)  | C36                    | C42 | C41 | 105.4(8)  |
| C7                     | C6  | C12 | 131.4(9)  | C44                    | C43 | Te2 | 117.6(7)  |
| C6                     | C7  | C8  | 120.2(9)  | C48                    | C43 | Te2 | 120.0(7)  |
| C9                     | C8  | C7  | 120.2(8)  | C48                    | C43 | C44 | 122.4(9)  |
| C8                     | C9  | S1  | 119.5(7)  | C45                    | C44 | C43 | 117.8(10) |
| C8                     | C9  | C10 | 121.1(8)  | C46                    | C45 | C44 | 121.2(10) |
| C10                    | C9  | S1  | 119.5(7)  | C45                    | C46 | C47 | 121.8(10) |
| C5                     | C10 | C1  | 115.7(8)  | C46                    | C47 | C48 | 117.8(10) |
| C5                     | C10 | C9  | 115.9(8)  | C43                    | C48 | C47 | 118.9(9)  |
| C9                     | C10 | C1  | 128.3(8)  | C51                    | C50 | S4  | 124.5(7)  |
| C4                     | C11 | C12 | 105.1(8)  | C51                    | C50 | C55 | 118.1(9)  |
| C6                     | C12 | C11 | 103.1(8)  | C55                    | C50 | S4  | 117.4(8)  |
| C14                    | C13 | Te1 | 118.7(7)  | C50                    | C51 | C52 | 121.7(9)  |
| C14                    | C13 | C18 | 121.1(9)  | C53                    | C52 | C51 | 119.3(10) |
| C18                    | C13 | Te1 | 120.0(7)  | C52                    | C53 | C54 | 119.7(10) |
| C15                    | C14 | C13 | 118.0(10) | C55                    | C54 | C53 | 119.6(10) |
| C16                    | C15 | C14 | 120.2(10) | C54                    | C55 | C50 | 121.5(10) |

**Table 5 Bond Angles for A19.**

| Atom Atom Atom Angle/° |     |     |           | Atom Atom Atom Angle/° |    |    |           |
|------------------------|-----|-----|-----------|------------------------|----|----|-----------|
| C17                    | C16 | C15 | 121.7(11) | F1                     | B1 | F2 | 108.4(11) |
| C16                    | C17 | C18 | 120.3(10) | F1                     | B1 | F3 | 112.3(11) |
| C17                    | C18 | C13 | 118.5(9)  | F1                     | B1 | F4 | 112.3(11) |
| C21                    | C20 | S1  | 121.7(7)  | F3                     | B1 | F2 | 110.1(10) |
| C21                    | C20 | C25 | 122.3(9)  | F3                     | B1 | F4 | 108.4(11) |
| C25                    | C20 | S1  | 116.0(8)  | F4                     | B1 | F2 | 105.0(11) |
| C22                    | C21 | C20 | 118.1(10) | F5                     | B2 | F6 | 105.8(11) |
| C21                    | C22 | C23 | 120.7(11) | F7                     | B2 | F5 | 108.4(13) |
| C24                    | C23 | C22 | 120.4(10) | F7                     | B2 | F6 | 111.0(15) |
| C23                    | C24 | C25 | 120.1(10) | F7                     | B2 | F8 | 113.4(12) |
| C20                    | C25 | C24 | 118.2(10) | F8                     | B2 | F5 | 110.8(14) |
| C32                    | C31 | Te2 | 119.2(7)  | F8                     | B2 | F6 | 107.1(10) |

**Table 6 Hydrogen Bonds for A19.**

| D   | H   | A               | d(D-H)/Å | d(H-A)/Å | d(D-A)/Å  | D-H-A/° |
|-----|-----|-----------------|----------|----------|-----------|---------|
| O3  | H3B | F8              | 0.87     | 2.38     | 3.152(13) | 148.7   |
| O4  | H4A | F5              | 0.87     | 2.52     | 2.999(14) | 115.5   |
| O4  | H4B | F4              | 0.87     | 2.35     | 3.030(13) | 135.1   |
| C18 | H18 | F1 <sup>1</sup> | 0.95     | 2.53     | 3.182(11) | 125.8   |
| C32 | H32 | O2              | 0.95     | 2.25     | 2.845(12) | 119.9   |

<sup>1</sup>1-X,1-Y,1-Z**Table 7 Torsion Angles for A19.**

| A   | B   | C   | D   | Angle/°   | A   | B   | C   | D   | Angle/°    |
|-----|-----|-----|-----|-----------|-----|-----|-----|-----|------------|
| Te1 | C1  | C2  | C3  | -176.6(7) | C18 | C13 | C14 | C15 | -3.4(14)   |
| Te1 | C1  | C10 | C5  | 177.1(6)  | C20 | S1  | C9  | C8  | 92.0(8)    |
| Te1 | C1  | C10 | C9  | -1.7(13)  | C20 | S1  | C9  | C10 | -87.7(8)   |
| Te1 | C13 | C14 | C15 | -179.0(7) | C20 | C21 | C22 | C23 | -1.1(15)   |
| Te1 | C13 | C18 | C17 | 179.5(7)  | C21 | C20 | C25 | C24 | -0.8(14)   |
| Te2 | C31 | C32 | C33 | 175.1(7)  | C21 | C22 | C23 | C24 | 0.3(16)    |
| Te2 | C31 | C40 | C35 | -173.4(6) | C22 | C23 | C24 | C25 | 0.2(16)    |
| Te2 | C31 | C40 | C39 | 6.7(14)   | C23 | C24 | C25 | C20 | 0.0(14)    |
| Te2 | C43 | C44 | C45 | 179.7(7)  | C25 | C20 | C21 | C22 | 1.3(14)    |
| Te2 | C43 | C48 | C47 | 179.4(7)  | C31 | C32 | C33 | C34 | -2.6(15)   |
| S1  | C9  | C10 | C1  | -5.1(13)  | C32 | C31 | C40 | C35 | -0.6(13)   |
| S1  | C9  | C10 | C5  | 176.0(6)  | C32 | C31 | C40 | C39 | 179.5(9)   |
| S1  | C20 | C21 | C22 | -178.7(7) | C32 | C33 | C34 | C35 | 1.0(15)    |
| S1  | C20 | C25 | C24 | 179.2(7)  | C32 | C33 | C34 | C41 | -179.0(10) |
| S4  | C39 | C40 | C31 | 7.4(14)   | C33 | C34 | C35 | C36 | -179.0(9)  |
| S4  | C39 | C40 | C35 | -172.5(7) | C33 | C34 | C35 | C40 | 0.7(15)    |
| S4  | C50 | C51 | C52 | -178.5(7) | C33 | C34 | C41 | C42 | -179.7(11) |
| S4  | C50 | C55 | C54 | -179.3(8) | C34 | C35 | C36 | C37 | 176.9(9)   |
| C1  | C2  | C3  | C4  | -1.8(16)  | C34 | C35 | C36 | C42 | -1.8(11)   |
| C2  | C1  | C10 | C5  | -0.8(13)  | C34 | C35 | C40 | C31 | -0.9(13)   |
| C2  | C1  | C10 | C9  | -179.7(9) | C34 | C35 | C40 | C39 | 179.0(9)   |
| C2  | C3  | C4  | C5  | 1.7(15)   | C34 | C41 | C42 | C36 | -1.3(11)   |
| C2  | C3  | C4  | C11 | 178.8(10) | C35 | C34 | C41 | C42 | 0.3(11)    |

**Table 7 Torsion Angles for A19.**

| A   | B   | C   | D   | Angle/°   | A   | B   | C   | D   | Angle/°    |
|-----|-----|-----|-----|-----------|-----|-----|-----|-----|------------|
| C3  | C4  | C5  | C6  | 177.4(9)  | C35 | C36 | C37 | C38 | 3.7(14)    |
| C3  | C4  | C5  | C10 | -1.3(15)  | C35 | C36 | C42 | C41 | 1.9(11)    |
| C3  | C4  | C11 | C12 | 179.7(11) | C36 | C35 | C40 | C31 | 178.7(9)   |
| C4  | C5  | C6  | C7  | -176.9(9) | C36 | C35 | C40 | C39 | -1.3(13)   |
| C4  | C5  | C6  | C12 | 3.6(11)   | C36 | C37 | C38 | C39 | -0.5(14)   |
| C4  | C5  | C10 | C1  | 0.8(14)   | C37 | C36 | C42 | C41 | -176.7(10) |
| C4  | C5  | C10 | C9  | 179.8(9)  | C37 | C38 | C39 | S4  | 173.3(7)   |
| C4  | C11 | C12 | C6  | 4.8(11)   | C37 | C38 | C39 | C40 | -3.6(14)   |
| C5  | C4  | C11 | C12 | -3.0(12)  | C38 | C39 | C40 | C31 | -175.7(9)  |
| C5  | C6  | C7  | C8  | -2.6(14)  | C38 | C39 | C40 | C35 | 4.3(13)    |
| C5  | C6  | C12 | C11 | -5.2(11)  | C39 | S4  | C50 | C51 | 11.0(9)    |
| C6  | C5  | C10 | C1  | -177.7(8) | C39 | S4  | C50 | C55 | -169.7(7)  |
| C6  | C5  | C10 | C9  | 1.3(13)   | C40 | C31 | C32 | C33 | 2.3(15)    |
| C6  | C7  | C8  | C9  | 0.3(14)   | C40 | C35 | C36 | C37 | -2.8(14)   |
| C7  | C6  | C12 | C11 | 175.4(10) | C40 | C35 | C36 | C42 | 178.5(9)   |
| C7  | C8  | C9  | S1  | -176.7(7) | C41 | C34 | C35 | C36 | 1.0(11)    |
| C7  | C8  | C9  | C10 | 3.0(14)   | C41 | C34 | C35 | C40 | -179.3(9)  |
| C8  | C9  | C10 | C1  | 175.1(9)  | C42 | C36 | C37 | C38 | -177.9(9)  |
| C8  | C9  | C10 | C5  | -3.7(13)  | C43 | C44 | C45 | C46 | 2.4(15)    |
| C9  | S1  | C20 | C21 | -25.3(9)  | C44 | C43 | C48 | C47 | 0.4(14)    |
| C9  | S1  | C20 | C25 | 154.7(7)  | C44 | C45 | C46 | C47 | -2.7(16)   |
| C10 | C1  | C2  | C3  | 1.4(15)   | C45 | C46 | C47 | C48 | 1.6(15)    |
| C10 | C5  | C6  | C7  | 1.8(14)   | C46 | C47 | C48 | C43 | -0.5(14)   |
| C10 | C5  | C6  | C12 | -177.7(9) | C48 | C43 | C44 | C45 | -1.3(14)   |
| C11 | C4  | C5  | C6  | -0.3(12)  | C50 | S4  | C39 | C38 | -95.3(8)   |
| C11 | C4  | C5  | C10 | -178.9(9) | C50 | S4  | C39 | C40 | 81.5(8)    |
| C12 | C6  | C7  | C8  | 176.8(9)  | C50 | C51 | C52 | C53 | -1.6(14)   |
| C13 | C14 | C15 | C16 | 1.3(15)   | C51 | C50 | C55 | C54 | 0.1(14)    |
| C14 | C13 | C18 | C17 | 3.9(14)   | C51 | C52 | C53 | C54 | -1.3(14)   |
| C14 | C15 | C16 | C17 | 0.2(16)   | C52 | C53 | C54 | C55 | 3.5(15)    |
| C15 | C16 | C17 | C18 | 0.3(16)   | C53 | C54 | C55 | C50 | -2.9(15)   |
| C16 | C17 | C18 | C13 | -2.3(14)  | C55 | C50 | C51 | C52 | 2.3(14)    |

**Table 8 Hydrogen Atom Coordinates ( $\text{\AA} \times 10^4$ ) and Isotropic Displacement Parameters ( $\text{\AA}^2 \times 10^3$ ) for A19.**

| Atom | x        | y        | z        | U(eq) |
|------|----------|----------|----------|-------|
| H3A  | 4389.22  | 3383.56  | 2333.45  | 174   |
| H3B  | 4232.06  | 2677.05  | 1655.27  | 174   |
| H4A  | 714.86   | 1715.84  | 2204.99  | 157   |
| H4B  | 608.8    | 2443.62  | 2728.84  | 157   |
| H2   | 12105.21 | 9125.52  | 2658.45  | 60    |
| H3   | 13316.73 | 9636.98  | 1305.89  | 64    |
| H7   | 10518.17 | 8710.49  | -1153.46 | 57    |
| H8   | 9155.17  | 8151.61  | 121.9    | 52    |
| H11A | 14115.56 | 9230.24  | -682.31  | 75    |
| H11B | 13014.09 | 10282.46 | -536     | 75    |
| H12A | 12167.01 | 9857.58  | -1487.65 | 72    |

**Table 8 Hydrogen Atom Coordinates ( $\text{\AA}\times 10^4$ ) and Isotropic Displacement Parameters ( $\text{\AA}^2\times 10^3$ ) for A19.**

| Atom | x        | y        | z       | U(eq) |
|------|----------|----------|---------|-------|
| H12B | 13193.25 | 8775.12  | -1559.9 | 72    |
| H14  | 9304.78  | 10547.86 | 3074.6  | 62    |
| H15  | 7501.18  | 11959.63 | 3219.32 | 70    |
| H16  | 5456.25  | 11883.94 | 3702.97 | 71    |
| H17  | 5139.31  | 10439.38 | 4041.17 | 63    |
| H18  | 6890.63  | 9007.76  | 3933.22 | 56    |
| H19A | 11067.48 | 8922.13  | 5134.93 | 72    |
| H19B | 9831.06  | 8630.1   | 5319.78 | 72    |
| H19C | 11234.97 | 7877.21  | 4846.68 | 72    |
| H21  | 11043.73 | 6499.12  | 622.94  | 58    |
| H22  | 12258.51 | 4861.62  | 671.83  | 71    |
| H23  | 11938.84 | 4009.83  | 2044.14 | 71    |
| H24  | 10395.34 | 4768.75  | 3375.16 | 70    |
| H25  | 9132.46  | 6412.33  | 3342.85 | 57    |
| H32  | 2569.75  | 6246.55  | 2591.07 | 56    |
| H33  | 1407.1   | 5737     | 4027.11 | 64    |
| H37  | 5076.31  | 6231.7   | 6064.9  | 56    |
| H38  | 6229.18  | 6843     | 4729.59 | 56    |
| H41A | 2097.48  | 4907.17  | 5729.75 | 70    |
| H41B | 1103.62  | 5988.98  | 5989.65 | 70    |
| H42A | 2363.27  | 6224.01  | 6701.67 | 72    |
| H42B | 3339.05  | 5134.94  | 6462.88 | 72    |
| H44  | 5284.16  | 4766.58  | 1805.48 | 59    |
| H45  | 6996.05  | 3295.41  | 1557.64 | 69    |
| H46  | 9042.53  | 3232.15  | 1263.14 | 69    |
| H47  | 9538.02  | 4643.32  | 1067.16 | 68    |
| H48  | 7820.22  | 6148.92  | 1274.57 | 57    |
| H49A | 3551.38  | 6241.3   | 71.87   | 85    |
| H49B | 3956.06  | 7158.32  | 31.82   | 85    |
| H49C | 5013.66  | 6098.75  | -55.91  | 85    |
| H51  | 3736.51  | 8498.66  | 4388.16 | 54    |
| H52  | 2303.04  | 10085.1  | 4497.97 | 61    |
| H53  | 2639.65  | 11141.2  | 3286.25 | 55    |
| H54  | 4468.28  | 10614.89 | 1991.18 | 69    |
| H55  | 5782.65  | 9024.03  | 1863.07 | 58    |

### X-ray Crystallographic Structure determination on A20

#### Data Collection

A colorless chip crystal of C<sub>26</sub>H<sub>25</sub>BF<sub>4</sub>O<sub>2</sub>SeTe having approximate dimensions of 0.150 x 0.090 x 0.060 mm was mounted in a loop. All measurements were made on a Rigaku Saturn724 diffractometer using graphite monochromated Mo-K $\alpha$  radiation.

Cell constants and an orientation matrix for data collection corresponded to a primitive triclinic cell with dimensions:

$$\begin{aligned} a &= 10.415(8) \text{ \AA} & a &= 61.44(3) \text{ \AA} \\ b &= 11.443(6) \text{ \AA} & b &= 84.01(4) \text{ \AA} \\ c &= 11.777(6) \text{ \AA} & g &= 88.75(4) \text{ \AA} \\ V &= 1225.4(13) \text{ \AA}^3 \end{aligned}$$

For  $Z = 2$  and  $F.W. = 662.85$ , the calculated density is  $1.796 \text{ g/cm}^3$ . Based on a statistical analysis of intensity distribution, and the successful solution and refinement of the structure, the space group was determined to be:

P-1 (#2)

The data were collected at a temperature of  $-148 \pm 10 \text{ C}$  to a maximum  $2\theta$  value of  $58.30^\circ$ .

#### Data Reduction

Of the 10562 reflections were collected, where 5326 were unique ( $R_{int} = 0.0617$ ); equivalent reflections were merged. Data were collected and processed using CrystalClear (Rigaku).<sup>1</sup> The linear absorption coefficient,  $\mu$ , for Mo-K $\alpha$  radiation is  $27.524 \text{ cm}^{-1}$ . An empirical absorption correction was applied which resulted in transmission factors ranging from 0.389 to 0.848. The data were corrected for Lorentz and polarization effects.

#### Structure Solution and Refinement

The structure was solved by direct methods<sup>2</sup> and expanded using Fourier techniques. The non-hydrogen atoms were refined anisotropically. Some hydrogen atoms were refined isotropically and the rest were refined using the riding model. The final cycle of full-matrix least-squares refinement<sup>3</sup> on  $F^2$  was based on 5326 observed reflections and 340 variable parameters and converged (largest parameter shift was 0.00 times its esd) with unweighted and weighted agreement factors of:

$$R1 = \sum ||F_o| - |F_c|| / \sum |F_o| = 0.0981$$

$$wR2 = [ \sum ( w (F_o - F_c)^2 ) / \sum w(F_o)^2 ]^{1/2} = 0.3485$$

The goodness of fit<sup>4</sup> was 1.13. Unit weights were used. The maximum and minimum peaks on the final difference Fourier map corresponded to  $1.72$  and  $-6.24 \text{ e}/\text{\AA}^3$ , respectively.

Neutral atom scattering factors were taken from International Tables for Crystallography (IT), Vol. C, Table 6.1.1.4 5. Anomalous dispersion effects were included in  $F_{calc}$ ; the values for  $D_f'$  and  $D_f''$  were those of Creagh and McAuley<sup>7</sup>. The values for the mass attenuation coefficients are those of Creagh and Hubbell<sup>8</sup>. All calculations were performed using the CrystalStructure<sup>9</sup> crystallographic software package except for refinement, which was performed using SHELXL Version 2018/3<sup>10</sup>.

Further refinement was undertaken with SHELXL within the Olex2 v. 1.5 suite.<sup>11</sup>

#### **Table 1 Crystal data and structure refinement for A20.**

|                                    |                                                              |
|------------------------------------|--------------------------------------------------------------|
| Identification code                | A20                                                          |
| Empirical formula                  | $\text{C}_{26}\text{H}_{25}\text{BF}_4\text{O}_2\text{SeTe}$ |
| Formula weight                     | 662.83                                                       |
| Temperature/K                      | 125.15                                                       |
| Crystal system                     | triclinic                                                    |
| Space group                        | P-1                                                          |
| $a/\text{\AA}$                     | 10.415(8)                                                    |
| $b/\text{\AA}$                     | 11.443(6)                                                    |
| $c/\text{\AA}$                     | 11.777(6)                                                    |
| $\alpha/^\circ$                    | 61.44(3)                                                     |
| $\beta/^\circ$                     | 84.01(4)                                                     |
| $\gamma/^\circ$                    | 88.75(4)                                                     |
| Volume/ $\text{\AA}^3$             | 1225.4(13)                                                   |
| $Z$                                | 2                                                            |
| $\rho_{\text{calc}}/\text{g/cm}^3$ | 1.796                                                        |
| $\mu/\text{mm}^{-1}$               | 2.752                                                        |
| $F(000)$                           | 648.0                                                        |
| Crystal size/ $\text{mm}^3$        | $0.15 \times 0.09 \times 0.06$                               |

Radiation MoK $\alpha$  ( $\lambda = 0.71075$ )  
 2 $\theta$  range for data collection/ $^{\circ}$  4.054 to 50.5  
 Index ranges  $-11 \leq h \leq 12, -13 \leq k \leq 12, -14 \leq l \leq 13$   
 Reflections collected 9374  
 Independent reflections 4361 [ $R_{\text{int}} = 0.0587, R_{\text{sigma}} = 0.1155$ ]  
 Data/restraints/parameters 4361/335/344  
 Goodness-of-fit on  $F^2$  1.111  
 Final R indexes [ $|I| \geq 2\sigma(I)$ ]  $R_1 = 0.0680, wR_2 = 0.1615$   
 Final R indexes [all data]  $R_1 = 0.0867, wR_2 = 0.2161$   
 Largest diff. peak/hole /  $e \text{ \AA}^{-3}$  1.90/-3.59

**Table 2 Fractional Atomic Coordinates ( $\times 10^4$ ) and Equivalent Isotropic Displacement Parameters ( $\text{\AA}^2 \times 10^3$ ) for A20.  $U_{\text{eq}}$  is defined as 1/3 of the trace of the orthogonalised  $U_{ij}$  tensor.**

| Atom | x          | y         | z         | U(eq)    |
|------|------------|-----------|-----------|----------|
| Te1  | 8544.9(5)  | 1664.4(5) | 3367.8(6) | 33.5(3)  |
| Se1  | 10254.6(9) | 4050.4(9) | 1776.6(9) | 35.0(3)  |
| F1   | 8579(7)    | 2575(8)   | 169(7)    | 78(2)    |
| F2   | 6970(7)    | 1220(7)   | 1503(6)   | 66.1(18) |
| F3   | 6652(10)   | 2853(12)  | -489(9)   | 74(4)    |
| F5   | 7654(16)   | 1074(12)  | -295(11)  | 109(5)   |
| O1   | 7426(7)    | 216(7)    | 4737(7)   | 55.6(19) |
| O26  | 6226(10)   | 2065(10)  | -2696(9)  | 82(3)    |
| C1   | 9385(8)    | 1854(8)   | 4854(8)   | 27.9(17) |
| C2   | 9062(10)   | 903(9)    | 6105(10)  | 42(2)    |
| C3   | 9548(11)   | 960(10)   | 7138(11)  | 49(2)    |
| C4   | 10351(10)  | 1977(9)   | 6906(9)   | 37(2)    |
| C5   | 10669(9)   | 2982(9)   | 5598(9)   | 34.0(18) |
| C6   | 11519(9)   | 3998(9)   | 5531(8)   | 32.2(18) |
| C7   | 11848(9)   | 5033(9)   | 4338(9)   | 37(2)    |
| C8   | 11447(9)   | 5056(9)   | 3237(10)  | 39(2)    |
| C9   | 10663(9)   | 4046(8)   | 3323(10)  | 36.5(19) |
| C10  | 10225(8)   | 2960(8)   | 4518(10)  | 33.9(18) |
| C11  | 11036(11)  | 2342(10)  | 7805(10)  | 49(2)    |
| C12  | 11808(10)  | 3664(10)  | 6839(10)  | 46(2)    |
| C13  | 7081(8)    | 3071(8)   | 3095(10)  | 35.3(19) |
| C14  | 6851(9)    | 4014(8)   | 1818(10)  | 39(2)    |
| C15  | 5872(10)   | 4897(10)  | 1686(13)  | 55(3)    |
| C16  | 5152(10)   | 4851(10)  | 2753(13)  | 55(3)    |
| C17  | 5404(10)   | 3934(11)  | 3984(13)  | 55(3)    |
| C18  | 6379(9)    | 3031(10)  | 4160(11)  | 46(2)    |
| C19  | 11708(8)   | 3045(8)   | 1580(8)   | 31.1(18) |
| C20  | 12838(9)   | 2939(10)  | 2129(9)   | 42(2)    |
| C21  | 13852(9)   | 2253(9)   | 1937(8)   | 37(2)    |
| C22  | 13732(10)  | 1669(9)   | 1135(9)   | 42(2)    |
| C23  | 12598(10)  | 1746(9)   | 611(9)    | 43(2)    |
| C24  | 11592(9)   | 2462(8)   | 807(8)    | 35.2(19) |
| C25  | 6676(11)   | -581(10)  | 4402(12)  | 56(3)    |



**Table 2 Fractional Atomic Coordinates ( $\times 10^4$ ) and Equivalent Isotropic Displacement Parameters ( $\text{\AA}^2 \times 10^3$ ) for A20.  $U_{\text{eq}}$  is defined as 1/3 of the trace of the orthogonalised  $U_{ij}$  tensor.**

| Atom | x        | y        | z         | $U(\text{eq})$ |
|------|----------|----------|-----------|----------------|
| C26  | 4940(14) | 1696(13) | -2200(15) | 80(4)          |
| B1   | 7476(16) | 1897(17) | 220(14)   | 45(3)          |
| F3A  | 6910(30) | 2100(30) | -620(30)  | 70(7)          |
| F5A  | 8520(30) | 740(30)  | 340(30)   | 66(7)          |
| B1A  | 7700(40) | 1610(50) | 330(30)   | 45(3)          |

**Table 3 Anisotropic Displacement Parameters ( $\text{\AA}^2 \times 10^3$ ) for A20. The Anisotropic displacement factor exponent takes the form:  $-2\pi^2[h^2a^2U_{11}+2hka*b*U_{12}+\dots]$ .**

| Atom | $U_{11}$ | $U_{22}$ | $U_{33}$ | $U_{23}$  | $U_{13}$ | $U_{12}$ |
|------|----------|----------|----------|-----------|----------|----------|
| Te1  | 29.0(5)  | 33.0(4)  | 40.4(5)  | -19.7(3)  | -0.1(3)  | -2.0(3)  |
| Se1  | 26.7(6)  | 37.3(6)  | 39.8(6)  | -18.4(5)  | 1.4(4)   | -0.2(4)  |
| F1   | 55(4)    | 98(5)    | 76(5)    | -39(4)    | 1(4)     | -21(4)   |
| F2   | 61(4)    | 91(5)    | 42(3)    | -27(3)    | -2(3)    | -17(3)   |
| F3   | 65(6)    | 81(7)    | 54(6)    | -12(5)    | -22(5)   | 16(5)    |
| F5   | 185(15)  | 102(8)   | 85(8)    | -79(7)    | -36(9)   | 25(9)    |
| O1   | 58(5)    | 44(4)    | 59(5)    | -23(4)    | 7(4)     | -21(3)   |
| O26  | 73(6)    | 109(7)   | 58(6)    | -36(6)    | -5(5)    | -4(5)    |
| C1   | 28.8(19) | 28.7(19) | 28.0(19) | -14.8(12) | -3.9(10) | 0.2(10)  |
| C2   | 39(6)    | 40(5)    | 41(4)    | -14(4)    | 2(4)     | -2(4)    |
| C3   | 46(6)    | 48(5)    | 58(6)    | -30(5)    | -2(5)    | 4(4)     |
| C4   | 42(4)    | 49(4)    | 33(3)    | -30(3)    | -11(3)   | 5(3)     |
| C5   | 25(5)    | 46(4)    | 42(4)    | -31(4)    | -2(4)    | 8(3)     |
| C6   | 32(4)    | 46(3)    | 27(3)    | -22(3)    | -14(3)   | 4(3)     |
| C7   | 38(6)    | 52(5)    | 29(4)    | -26(4)    | -8(4)    | 3(4)     |
| C8   | 32(5)    | 42(5)    | 46(5)    | -24(4)    | 4(4)     | -4(4)    |
| C9   | 26(5)    | 29(4)    | 51(5)    | -18(3)    | 2(4)     | 3(3)     |
| C10  | 26(5)    | 31(4)    | 51(5)    | -25(3)    | 3(4)     | 1(3)     |
| C11  | 53(5)    | 61(4)    | 42(4)    | -30(3)    | -12(3)   | -2(3)    |
| C12  | 40(6)    | 57(5)    | 56(5)    | -38(5)    | -5(4)    | 4(4)     |
| C13  | 18(4)    | 35(4)    | 49(5)    | -17(4)    | -2(4)    | -1(3)    |
| C14  | 33(5)    | 35(4)    | 44(5)    | -16(4)    | 2(4)     | -5(3)    |
| C15  | 34(6)    | 38(5)    | 84(7)    | -24(5)    | -5(5)    | -1(4)    |
| C16  | 28(6)    | 39(5)    | 100(7)   | -36(5)    | -1(5)    | -1(4)    |
| C17  | 29(6)    | 60(6)    | 83(7)    | -43(5)    | 5(5)     | -5(4)    |
| C18  | 30(5)    | 54(6)    | 65(6)    | -37(5)    | 6(4)     | -4(4)    |
| C19  | 26(4)    | 31(4)    | 36(5)    | -17(4)    | 1(4)     | -5(3)    |
| C20  | 31(5)    | 64(6)    | 45(6)    | -37(5)    | -13(4)   | 2(4)     |
| C21  | 35(4)    | 54(5)    | 26(4)    | -19(4)    | -18(4)   | 5(4)     |
| C22  | 41(5)    | 46(5)    | 32(5)    | -13(4)    | -3(4)    | 8(4)     |
| C23  | 53(6)    | 47(5)    | 28(5)    | -17(4)    | -15(4)   | 13(4)    |
| C24  | 38(5)    | 39(5)    | 21(4)    | -7(4)     | -9(4)    | 1(4)     |
| C25  | 53(7)    | 41(6)    | 73(8)    | -26(6)    | 5(6)     | -18(5)   |
| C26  | 63(8)    | 64(8)    | 105(12)  | -33(8)    | -8(8)    | 3(6)     |
| B1   | 52(7)    | 64(7)    | 33(5)    | -32(5)    | -10(4)   | -1(4)    |

**Table 3 Anisotropic Displacement Parameters ( $\text{\AA}^2 \times 10^3$ ) for A20. The Anisotropic displacement factor exponent takes the form:  $-2\pi^2[h^2a^*U_{11}+2hka^*b^*U_{12}+\dots]$ .**

| Atom | $U_{11}$ | $U_{22}$ | $U_{33}$ | $U_{23}$ | $U_{13}$ | $U_{12}$ |
|------|----------|----------|----------|----------|----------|----------|
| F3A  | 74(10)   | 84(12)   | 55(8)    | -32(8)   | -23(7)   | 7(8)     |
| F5A  | 73(10)   | 79(8)    | 49(11)   | -32(8)   | -13(7)   | 13(7)    |
| B1A  | 52(7)    | 64(7)    | 33(5)    | -32(5)   | -10(4)   | -1(4)    |

**Table 4 Bond Lengths for A20.**

| Atom | Atom | Length/ $\text{\AA}$ | Atom | Atom | Length/ $\text{\AA}$ |
|------|------|----------------------|------|------|----------------------|
| Te1  | Se1  | 2.960(2)             | C11  | C12  | 1.564(15)            |
| Te1  | O1   | 1.960(7)             | C12  | H12A | 0.9900               |
| Te1  | C1   | 2.137(8)             | C12  | H12B | 0.9900               |
| Te1  | C13  | 2.126(9)             | C13  | C14  | 1.413(13)            |
| Se1  | C9   | 1.911(10)            | C13  | C18  | 1.366(14)            |
| Se1  | C19  | 1.943(9)             | C14  | H14  | 0.9500               |
| F1   | B1   | 1.381(16)            | C14  | C15  | 1.386(13)            |
| F1   | B1A  | 1.38(2)              | C15  | H15  | 0.9500               |
| F2   | B1   | 1.376(15)            | C15  | C16  | 1.373(16)            |
| F2   | B1A  | 1.37(2)              | C16  | H16  | 0.9500               |
| F3   | B1   | 1.36(2)              | C16  | C17  | 1.373(16)            |
| F5   | B1   | 1.343(18)            | C17  | H17  | 0.9500               |
| O1   | C25  | 1.427(12)            | C17  | C18  | 1.391(14)            |
| O26  | C26  | 1.392(17)            | C18  | H18  | 0.9500               |
| O26  | H26  | 0.980(5)             | C19  | C20  | 1.377(12)            |
| C1   | C2   | 1.360(13)            | C19  | C24  | 1.376(12)            |
| C1   | C10  | 1.422(12)            | C20  | H20  | 0.9500               |
| C2   | H2   | 0.9500               | C20  | C21  | 1.366(13)            |
| C2   | C3   | 1.395(14)            | C21  | H21  | 0.9500               |
| C3   | H3   | 0.9500               | C21  | C22  | 1.410(13)            |
| C3   | C4   | 1.348(14)            | C22  | H22  | 0.9500               |
| C4   | C5   | 1.422(13)            | C22  | C23  | 1.371(13)            |
| C4   | C11  | 1.549(13)            | C23  | H23  | 0.9500               |
| C5   | C6   | 1.444(13)            | C23  | C24  | 1.384(13)            |
| C5   | C10  | 1.409(13)            | C24  | H24  | 0.9500               |
| C6   | C7   | 1.349(13)            | C25  | H25A | 0.9800               |
| C6   | C12  | 1.463(12)            | C25  | H25B | 0.9800               |
| C7   | H7   | 0.9500               | C25  | H25C | 0.9800               |
| C7   | C8   | 1.391(13)            | C26  | H26A | 0.9800               |
| C8   | H8   | 0.9500               | C26  | H26B | 0.9800               |
| C8   | C9   | 1.387(13)            | C26  | H26C | 0.9800               |
| C9   | C10  | 1.397(13)            | F3A  | B1A  | 1.34(5)              |
| C11  | H11A | 0.9900               | F5A  | B1A  | 1.30(6)              |
| C11  | H11B | 0.9900               |      |      |                      |

**Table 5 Bond Angles for A20.**

| Atom | Atom | Atom | Angle/°   | Atom | Atom | Atom | Angle/°   |
|------|------|------|-----------|------|------|------|-----------|
| O1   | Te1  | Se1  | 166.4(2)  | C9   | C10  | C5   | 114.1(8)  |
| O1   | Te1  | C1   | 88.4(3)   | C4   | C11  | C12  | 103.7(8)  |
| O1   | Te1  | C13  | 91.6(3)   | C6   | C12  | C11  | 107.0(8)  |
| C1   | Te1  | Se1  | 79.3(2)   | C14  | C13  | Te1  | 119.2(7)  |
| C13  | Te1  | Se1  | 84.2(2)   | C18  | C13  | Te1  | 119.1(7)  |
| C13  | Te1  | C1   | 96.5(3)   | C18  | C13  | C14  | 121.7(9)  |
| C9   | Se1  | Te1  | 89.9(3)   | C15  | C14  | C13  | 117.3(10) |
| C9   | Se1  | C19  | 97.8(4)   | C16  | C15  | C14  | 121.3(11) |
| C19  | Se1  | Te1  | 94.2(3)   | C15  | C16  | C17  | 120.3(10) |
| C25  | O1   | Te1  | 119.2(7)  | C16  | C17  | C18  | 120.2(11) |
| C2   | C1   | Te1  | 117.5(7)  | C13  | C18  | C17  | 119.2(11) |
| C2   | C1   | C10  | 122.5(8)  | C20  | C19  | Se1  | 123.3(7)  |
| C10  | C1   | Te1  | 120.0(6)  | C24  | C19  | Se1  | 116.9(6)  |
| C1   | C2   | C3   | 121.4(9)  | C24  | C19  | C20  | 119.8(8)  |
| C4   | C3   | C2   | 120.0(10) | C21  | C20  | C19  | 121.5(8)  |
| C3   | C4   | C5   | 118.5(8)  | C20  | C21  | C22  | 118.5(8)  |
| C3   | C4   | C11  | 133.1(10) | C23  | C22  | C21  | 120.1(9)  |
| C5   | C4   | C11  | 108.5(8)  | C22  | C23  | C24  | 120.1(9)  |
| C4   | C5   | C6   | 111.1(8)  | C19  | C24  | C23  | 119.9(8)  |
| C10  | C5   | C4   | 123.8(8)  | F2   | B1   | F1   | 107.1(10) |
| C10  | C5   | C6   | 125.1(9)  | F3   | B1   | F1   | 105.7(13) |
| C5   | C6   | C12  | 109.7(8)  | F3   | B1   | F2   | 110.1(13) |
| C7   | C6   | C5   | 116.4(8)  | F5   | B1   | F1   | 114.7(14) |
| C7   | C6   | C12  | 133.9(8)  | F5   | B1   | F2   | 111.2(13) |
| C6   | C7   | C8   | 120.8(9)  | F5   | B1   | F3   | 107.9(12) |
| C9   | C8   | C7   | 121.7(9)  | F2   | B1A  | F1   | 107.6(16) |
| C8   | C9   | Se1  | 120.0(7)  | F3A  | B1A  | F1   | 111(3)    |
| C8   | C9   | C10  | 121.8(9)  | F3A  | B1A  | F2   | 109(3)    |
| C10  | C9   | Se1  | 118.0(6)  | F5A  | B1A  | F1   | 97(3)     |
| C5   | C10  | C1   | 113.8(8)  | F5A  | B1A  | F2   | 114(4)    |
| C9   | C10  | C1   | 132.1(9)  | F5A  | B1A  | F3A  | 117(2)    |

**Table 6 Hydrogen Bonds for A20.**

| D   | H    | A                | d(D-H)/Å | d(H-A)/Å | d(D-A)/Å  | D-H-A/° |
|-----|------|------------------|----------|----------|-----------|---------|
| C2  | H2   | O1               | 0.95     | 2.21     | 2.823(12) | 120.9   |
| C11 | H11A | F5A <sup>1</sup> | 0.99     | 2.40     | 3.19(3)   | 136.4   |
| C24 | H24  | F1               | 0.95     | 2.38     | 3.287(12) | 159.7   |
| O26 | H26  | F3               | 0.980(5) | 2.49(9)  | 3.203(16) | 129(8)  |
| O26 | H26  | F5               | 0.980(5) | 2.07(3)  | 3.039(16) | 169(9)  |
| O26 | H26  | F3A              | 0.980(5) | 1.76(7)  | 2.64(3)   | 147(10) |

<sup>1</sup>2-X,-Y,1-Z

**Table 7 Torsion Angles for A20.**

| A      | B      | C      | D   | Angle/°    | A      | B      | C      | D   | Angle/°   |
|--------|--------|--------|-----|------------|--------|--------|--------|-----|-----------|
| Te1C1  | C2     | C3     |     | -178.9(7)  | C6     | C5     | C10C9  |     | -1.0(13)  |
| Te1C1  | C10C5  |        |     | 177.8(6)   | C6     | C7     | C8     | C9  | 2.1(15)   |
| Te1C1  | C10C9  |        |     | -0.1(13)   | C7     | C6     | C12C11 |     | 176.5(11) |
| Te1C13 | C14C15 |        |     | 178.9(7)   | C7     | C8     | C9     | Se1 | -174.9(7) |
| Te1C13 | C18C17 |        |     | -178.8(7)  | C7     | C8     | C9     | C10 | 0.6(14)   |
| Se1C9  | C10C1  |        |     | -7.6(13)   | C8     | C9     | C10C1  |     | 176.8(9)  |
| Se1C9  | C10C5  |        |     | 174.5(6)   | C8     | C9     | C10C5  |     | -1.1(12)  |
| Se1C19 | C20C21 |        |     | -178.1(8)  | C10C1  | C2     | C3     |     | -0.2(14)  |
| Se1C19 | C24C23 |        |     | 179.1(7)   | C10C5  | C6     | C7     |     | 3.6(13)   |
| C1     | C2     | C3     | C4  | 0.3(15)    | C10C5  | C6     | C12    |     | -177.9(8) |
| C2     | C1     | C10C5  |     | -0.9(12)   | C11C4  | C5     | C6     |     | 0.3(12)   |
| C2     | C1     | C10C9  |     | -178.8(9)  | C11C4  | C5     | C10    |     | 179.1(8)  |
| C2     | C3     | C4     | C5  | 0.8(15)    | C12C6  | C7     | C8     |     | 178.0(10) |
| C2     | C3     | C4     | C11 | 179.4(11)  | C13C14 | C15    | C16    |     | -0.4(14)  |
| C3     | C4     | C5     | C6  | 179.1(9)   | C14C13 | C18C17 |        |     | 0.5(14)   |
| C3     | C4     | C5     | C10 | -2.0(14)   | C14C15 | C16C17 |        |     | 1.1(16)   |
| C3     | C4     | C11C12 |     | -179.9(11) | C15C16 | C17C18 |        |     | -1.0(15)  |
| C4     | C5     | C6     | C7  | -177.6(8)  | C16C17 | C18C13 |        |     | 0.2(15)   |
| C4     | C5     | C6     | C12 | 0.9(11)    | C18C13 | C14C15 |        |     | -0.4(13)  |
| C4     | C5     | C10C1  |     | 2.0(12)    | C19C20 | C21C22 |        |     | 1.2(15)   |
| C4     | C5     | C10C9  |     | -179.7(8)  | C20C19 | C24C23 |        |     | 1.5(14)   |
| C4     | C11    | C12C6  |     | 1.7(11)    | C20C21 | C22C23 |        |     | -2.7(15)  |
| C5     | C4     | C11C12 |     | -1.2(11)   | C21C22 | C23C24 |        |     | 3.6(15)   |
| C5     | C6     | C7     | C8  | -4.0(14)   | C22C23 | C24C19 |        |     | -3.0(15)  |
| C5     | C6     | C12C11 |     | -1.7(10)   | C24C19 | C20C21 |        |     | -0.7(15)  |
| C6     | C5     | C10C1  |     | -179.4(8)  |        |        |        |     |           |

**Table 8 Hydrogen Atom Coordinates ( $\text{\AA}\times 10^4$ ) and Isotropic Displacement Parameters ( $\text{\AA}^2\times 10^3$ ) for A20.**

| Atom | x        | y       | z       | U(eq) |
|------|----------|---------|---------|-------|
| H2   | 8494.48  | 184.35  | 6280.11 | 51    |
| H3   | 9312.42  | 283.29  | 8005.26 | 59    |
| H7   | 12360.54 | 5754.82 | 4248.44 | 44    |
| H8   | 11716.21 | 5781.55 | 2406.08 | 47    |
| H11A | 11625.07 | 1635.67 | 8313.81 | 59    |
| H11B | 10400.47 | 2481.09 | 8412.3  | 59    |
| H12A | 11542.14 | 4386.51 | 7040.94 | 56    |
| H12B | 12746.41 | 3542.06 | 6906.21 | 56    |
| H14  | 7346.01  | 4042    | 1080.64 | 47    |
| H15  | 5695.83  | 5546.25 | 840.18  | 66    |
| H16  | 4476.11  | 5456.46 | 2638.09 | 66    |
| H17  | 4911.17  | 3916.72 | 4717.95 | 65    |
| H18  | 6553.5   | 2394.5  | 5010.71 | 56    |
| H20  | 12913.78 | 3351.94 | 2653.59 | 50    |
| H21  | 14620.86 | 2172.18 | 2334.96 | 45    |
| H22  | 14438.78 | 1219.86 | 957.99  | 50    |

**Table 8 Hydrogen Atom Coordinates ( $\text{\AA} \times 10^4$ ) and Isotropic Displacement Parameters ( $\text{\AA}^2 \times 10^3$ ) for A20.**

| Atom | x        | y         | z         | U(eq) |
|------|----------|-----------|-----------|-------|
| H23  | 12502.83 | 1307.91   | 111.96    | 51    |
| H24  | 10821.94 | 2550.51   | 409.33    | 42    |
| H25A | 7223.32  | -858.01   | 3850.16   | 68    |
| H25B | 5965.39  | -60.9     | 3929.71   | 68    |
| H25C | 6322.46  | -1369.82  | 5195.83   | 68    |
| H26A | 4891.55  | 796.99    | -1455.69  | 96    |
| H26B | 4454.55  | 1709.71   | -2875.07  | 96    |
| H26C | 4568.6   | 2322.85   | -1919.01  | 96    |
| H26  | 6570(90) | 1750(100) | -1860(50) | 68    |

**Table 9 Atomic Occupancy for A20.**

| Atom | Occupancy | Atom | Occupancy | Atom | Occupancy |
|------|-----------|------|-----------|------|-----------|
| F3   | 0.734(17) | F5   | 0.734(17) | B1   | 0.734(17) |
| F3A  | 0.266(17) | F5A  | 0.266(17) | B1A  | 0.266(17) |

**X-ray Crystallographic Structure determination on A21**Data Collection

A yellow prism crystal of  $\text{C}_{26}\text{H}_{26}\text{BF}_4\text{O}_2\text{Te}_2$  having approximate dimensions of 0.060 x 0.030 x 0.030 mm was mounted on a glass fiber. All measurements were made on a Rigaku Mercury70 diffractometer Mo-K $\alpha$  radiation.

Cell constants and an orientation matrix for data collection corresponded to a primitive triclinic cell with dimensions:

$$\begin{aligned} a &= 10.593(3) \text{ \AA} & a &= 61.571(14) \text{ \AA} \\ b &= 11.100(2) \text{ \AA} & b &= 85.183(18) \text{ \AA} \\ c &= 12.010(2) \text{ \AA} & g &= 87.92(2) \text{ \AA} \\ V &= 1237.4(5) \text{ \AA}^3 \end{aligned}$$

For  $Z = 2$  and F.W. = 712.49, the calculated density is 1.912 g/cm<sup>3</sup>. Based on a statistical analysis of intensity distribution, and the successful solution and refinement of the structure, the space group was determined to be:

P-1 (#2)

The data were collected at a temperature of  $-180 \pm 1$ oC to a maximum  $2\theta$  value of 50.7o.

Data Reduction

Of the 7940 reflections were collected, where 4389 were unique ( $R_{int} = 0.0215$ ); equivalent reflections were merged. Data were collected and processed using CrystalClear (Rigaku). 1

The linear absorption coefficient,  $\mu$ , for Mo-K $\alpha$  radiation is 24.106 cm<sup>-1</sup>. An empirical absorption correction was applied which resulted in transmission factors ranging from 0.779 to 0.930. The data were corrected for Lorentz and polarization effects.

Structure Solution and Refinement

The structure was solved by heavy-atom Patterson methods<sup>2</sup> and expanded using Fourier techniques. The non-hydrogen atoms were refined anisotropically. Some hydrogen atoms were refined isotropically and the rest were refined using the riding model. The final cycle of full-matrix least-squares refinement<sup>3</sup> on F<sub>2</sub> was based on 4389 observed reflections and 322 variable parameters and converged (largest parameter shift

was 0.01 times its esd) with unweighted and weighted agreement factors of:

$$R_1 = \sum ||F_o| - |F_c|| / \sum |F_o| = 0.0344$$

$$wR_2 = [ \sum (w (F_o - F_c)^2) / \sum w(F_o)^2 ]^{1/2} = 0.0588$$

The goodness of fit was 1.02. Unit weights were used. The maximum and minimum peaks on the final difference Fourier map corresponded to 1.11 and -0.88 e-/Å<sup>3</sup>, respectively.

Neutral atom scattering factors were taken from International Tables for Crystallography (IT), Vol. C, Table 6.1.1.4 5. Anomalous dispersion effects were included in F<sub>calc</sub>; the values for D<sub>f</sub>' and D<sub>f</sub>" were those of Creagh and McAuley<sup>7</sup>. The values for the mass attenuation coefficients are those of Creagh and Hubbell<sup>8</sup>. All calculations were performed using the CrystalStructure9 crystallographic software package except for refinement, which was performed using SHELXL Version 2018/310.

Further refinement was undertaken with SHELXL within the Olex2 v. 1.5 suite.<sup>11</sup>

**Table 1 Crystal data and structure refinement for A21.**

|                                             |                                                                                |
|---------------------------------------------|--------------------------------------------------------------------------------|
| Identification code                         | A21                                                                            |
| Empirical formula                           | C <sub>26</sub> H <sub>25</sub> BF <sub>4</sub> O <sub>2</sub> Te <sub>2</sub> |
| Formula weight                              | 711.47                                                                         |
| Temperature/K                               | 93.15                                                                          |
| Crystal system                              | triclinic                                                                      |
| Space group                                 | P-1                                                                            |
| a/Å                                         | 10.593(3)                                                                      |
| b/Å                                         | 11.100(2)                                                                      |
| c/Å                                         | 12.010(2)                                                                      |
| α/°                                         | 61.571(14)                                                                     |
| β/°                                         | 85.183(18)                                                                     |
| γ/°                                         | 87.92(2)                                                                       |
| Volume/Å <sup>3</sup>                       | 1237.4(5)                                                                      |
| Z                                           | 2                                                                              |
| ρ <sub>calc</sub> /g/cm <sup>3</sup>        | 1.909                                                                          |
| μ/mm <sup>-1</sup>                          | 2.410                                                                          |
| F(000)                                      | 684.0                                                                          |
| Crystal size/mm <sup>3</sup>                | 0.06 × 0.03 × 0.03                                                             |
| Radiation                                   | MoKα (λ = 0.71075)                                                             |
| 2θ range for data collection/°              | 3.858 to 50.694                                                                |
| Index ranges                                | -12 ≤ h ≤ 10, -12 ≤ k ≤ 13, -13 ≤ l ≤ 14                                       |
| Reflections collected                       | 7940                                                                           |
| Independent reflections                     | 4389 [R <sub>int</sub> = 0.0215, R <sub>sigma</sub> = 0.0571]                  |
| Data/restraints/parameters                  | 4389/1/322                                                                     |
| Goodness-of-fit on F <sup>2</sup>           | 1.035                                                                          |
| Final R indexes [I >= 2σ (I)]               | R <sub>1</sub> = 0.0345, wR <sub>2</sub> = 0.0538                              |
| Final R indexes [all data]                  | R <sub>1</sub> = 0.0436, wR <sub>2</sub> = 0.0576                              |
| Largest diff. peak/hole / e Å <sup>-3</sup> | 1.10/-0.91                                                                     |

**Table 2 Fractional Atomic Coordinates ( $\times 10^4$ ) and Equivalent Isotropic Displacement Parameters ( $\text{\AA}^2 \times 10^3$ ) for A21.  $U_{\text{eq}}$  is defined as 1/3 of the trace of the orthogonalised  $U_{ij}$  tensor.**

| Atom | x         | y         | z         | U(eq)    |
|------|-----------|-----------|-----------|----------|
| Te1  | 1502.1(2) | 3457.3(2) | 1533.2(2) | 20.92(9) |
| Te2  | -168.3(2) | 932.2(3)  | 3238.5(2) | 22.92(9) |
| F1   | 2181(3)   | 3826(3)   | 5416(3)   | 75.0(10) |
| F2   | 3149(3)   | 1980(3)   | 5476(2)   | 55.4(8)  |
| F3   | 2988(2)   | 3862(3)   | 3586(2)   | 48.5(7)  |
| F4   | 1277(2)   | 2586(3)   | 4649(3)   | 60.0(8)  |
| O1   | 2598(3)   | 4930(3)   | 176(3)    | 33.2(7)  |
| O26  | 3580(3)   | 2801(4)   | 7726(3)   | 54.5(9)  |
| C1   | 666(3)    | 3238(4)   | 76(4)     | 19.9(9)  |
| C2   | 1018(4)   | 4179(4)   | -1159(4)  | 25.1(10) |
| C3   | 550(4)    | 4137(4)   | -2211(4)  | 28.6(10) |
| C4   | -278(4)   | 3131(4)   | -1995(4)  | 25.2(10) |
| C5   | -629(4)   | 2159(4)   | -742(4)   | 21.0(9)  |
| C6   | -1481(4)  | 1164(4)   | -685(4)   | 25.4(10) |
| C7   | -1871(4)  | 110(4)    | 464(4)    | 26.7(10) |
| C8   | -1454(4)  | 65(4)     | 1571(4)   | 27.0(10) |
| C9   | -655(4)   | 1045(4)   | 1526(4)   | 22.2(9)  |
| C10  | -186(3)   | 2145(4)   | 345(4)    | 18.9(9)  |
| C11  | -922(4)   | 2800(4)   | -2892(4)  | 33.4(11) |
| C12  | -1770(4)  | 1551(4)   | -2028(4)  | 29.1(10) |
| C13  | 2942(3)   | 1969(4)   | 1870(4)   | 21.3(9)  |
| C14  | 3613(4)   | 1979(4)   | 817(4)    | 28.6(10) |
| C15  | 4599(4)   | 1052(5)   | 1012(5)   | 37.3(12) |
| C16  | 4899(4)   | 150(4)    | 2237(5)   | 40.4(12) |
| C17  | 4226(4)   | 152(4)    | 3276(4)   | 35.2(11) |
| C18  | 3238(4)   | 1065(4)   | 3094(4)   | 26.5(10) |
| C19  | -1788(3)  | 1981(4)   | 3505(3)   | 18.6(9)  |
| C20  | -1738(4)  | 2512(4)   | 4338(4)   | 26.7(10) |
| C21  | -2804(4)  | 3165(4)   | 4549(4)   | 30.6(10) |
| C22  | -3891(4)  | 3273(4)   | 3959(4)   | 30.8(10) |
| C23  | -3919(4)  | 2755(4)   | 3115(4)   | 34.6(11) |
| C24  | -2869(4)  | 2106(4)   | 2887(4)   | 30.4(10) |
| C25  | 3402(4)   | 5639(4)   | 576(4)    | 39.6(12) |
| C26  | 4837(5)   | 3247(5)   | 7295(6)   | 71.0(18) |
| B1   | 2395(5)   | 3105(5)   | 4775(4)   | 25.6(11) |

**Table 3 Anisotropic Displacement Parameters ( $\text{\AA}^2 \times 10^3$ ) for A21. The Anisotropic displacement factor exponent takes the form:  $-2\pi^2[h^2a^2U_{11}+2hka*b*U_{12}+\dots]$ .**

| Atom | $U_{11}$  | $U_{22}$  | $U_{33}$  | $U_{23}$   | $U_{13}$  | $U_{12}$  |
|------|-----------|-----------|-----------|------------|-----------|-----------|
| Te1  | 20.57(17) | 24.16(16) | 21.42(16) | -13.21(13) | -4.52(12) | 1.61(12)  |
| Te2  | 19.79(17) | 30.93(17) | 17.50(15) | -11.15(13) | -1.67(12) | 1.87(12)  |
| F1   | 113(3)    | 67(2)     | 67(2)     | -49.4(19)  | -13(2)    | 9.2(19)   |
| F2   | 57(2)     | 59.2(18)  | 36.6(17)  | -11.9(15)  | -8.3(15)  | 14.5(16)  |
| F3   | 31.8(16)  | 60.7(18)  | 32.4(16)  | -5.5(14)   | 2.5(13)   | -10.9(14) |

**Table 3 Anisotropic Displacement Parameters ( $\text{\AA}^2 \times 10^3$ ) for A21. The Anisotropic displacement factor exponent takes the form:  $-2\pi^2[h^2a^*U_{11}+2hka^*b^*U_{12}+\dots]$ .**

| Atom | $U_{11}$ | $U_{22}$ | $U_{33}$ | $U_{23}$  | $U_{13}$ | $U_{12}$  |
|------|----------|----------|----------|-----------|----------|-----------|
| F4   | 36.0(18) | 97(2)    | 51.5(19) | -38.5(18) | 3.9(15)  | -24.0(16) |
| O1   | 40(2)    | 30.1(16) | 28.6(17) | -12.4(14) | -2.3(15) | -14.0(14) |
| O26  | 48(2)    | 76(3)    | 46(2)    | -34(2)    | -2.4(19) | 1(2)      |
| C1   | 17(2)    | 23(2)    | 24(2)    | -14(2)    | -5.2(18) | 5.3(18)   |
| C2   | 24(2)    | 24(2)    | 27(2)    | -12(2)    | -4(2)    | 0.1(19)   |
| C3   | 32(3)    | 30(2)    | 20(2)    | -10(2)    | -1(2)    | 2(2)      |
| C4   | 24(2)    | 33(2)    | 20(2)    | -14(2)    | -9.2(19) | 9(2)      |
| C5   | 16(2)    | 28(2)    | 25(2)    | -18(2)    | -2.5(18) | 3.7(18)   |
| C6   | 17(2)    | 38(3)    | 32(3)    | -25(2)    | -6(2)    | 7(2)      |
| C7   | 20(2)    | 32(2)    | 38(3)    | -24(2)    | -3(2)    | 0(2)      |
| C8   | 22(2)    | 31(2)    | 30(3)    | -17(2)    | 5(2)     | -4(2)     |
| C9   | 21(2)    | 28(2)    | 22(2)    | -16(2)    | -2.4(19) | 1.5(19)   |
| C10  | 15(2)    | 25(2)    | 22(2)    | -15(2)    | -3.6(18) | 7.8(18)   |
| C11  | 30(3)    | 52(3)    | 26(3)    | -25(2)    | -12(2)   | 3(2)      |
| C12  | 26(3)    | 42(3)    | 32(3)    | -27(2)    | -12(2)   | 7(2)      |
| C13  | 12(2)    | 23(2)    | 36(3)    | -20(2)    | -2.4(19) | -2.5(18)  |
| C14  | 19(2)    | 33(2)    | 38(3)    | -20(2)    | -2(2)    | -4(2)     |
| C15  | 22(3)    | 43(3)    | 57(3)    | -32(3)    | -1(2)    | -1(2)     |
| C16  | 19(3)    | 30(3)    | 81(4)    | -32(3)    | -9(3)    | 4(2)      |
| C17  | 27(3)    | 26(2)    | 51(3)    | -14(2)    | -16(2)   | 1(2)      |
| C18  | 20(2)    | 27(2)    | 33(3)    | -13(2)    | -8(2)    | -2.4(19)  |
| C19  | 16(2)    | 20(2)    | 15(2)    | -4.9(18)  | 2.8(17)  | -2.8(17)  |
| C20  | 19(2)    | 33(2)    | 27(2)    | -14(2)    | -5(2)    | 4(2)      |
| C21  | 32(3)    | 32(2)    | 35(3)    | -22(2)    | -4(2)    | 0(2)      |
| C22  | 25(3)    | 27(2)    | 38(3)    | -15(2)    | 3(2)     | 0(2)      |
| C23  | 17(3)    | 40(3)    | 51(3)    | -24(3)    | -13(2)   | 2(2)      |
| C24  | 24(3)    | 36(3)    | 36(3)    | -21(2)    | -5(2)    | -2(2)     |
| C25  | 35(3)    | 33(3)    | 52(3)    | -21(3)    | -2(2)    | -9(2)     |
| C26  | 39(4)    | 40(3)    | 119(6)   | -27(4)    | 0(4)     | 1(3)      |
| B1   | 23(3)    | 35(3)    | 18(3)    | -12(2)    | -3(2)    | -1(2)     |

**Table 4 Bond Lengths for A21.**

| Atom | Atom | Length/ $\text{\AA}$ | Atom | Atom | Length/ $\text{\AA}$ |
|------|------|----------------------|------|------|----------------------|
| Te1  | Te2  | 3.0769(10)           | C11  | C12  | 1.540(6)             |
| Te1  | O1   | 1.990(3)             | C12  | H12A | 0.9900               |
| Te1  | C1   | 2.142(3)             | C12  | H12B | 0.9900               |
| Te1  | C13  | 2.122(4)             | C13  | C14  | 1.394(5)             |
| Te2  | C9   | 2.107(3)             | C13  | C18  | 1.384(5)             |
| Te2  | C19  | 2.126(4)             | C14  | H14  | 0.9500               |
| F1   | B1   | 1.352(5)             | C14  | C15  | 1.392(6)             |
| F2   | B1   | 1.395(5)             | C15  | H15  | 0.9500               |
| F3   | B1   | 1.373(5)             | C15  | C16  | 1.386(6)             |
| F4   | B1   | 1.386(5)             | C16  | H16  | 0.9500               |
| O1   | C25  | 1.432(4)             | C16  | C17  | 1.385(6)             |



**Table 4 Bond Lengths for A21.**

| Atom | Atom | Length/Å | Atom | Atom | Length/Å |
|------|------|----------|------|------|----------|
| O26  | C26  | 1.405(6) | C17  | H17  | 0.9500   |
| O26  | H26  | 0.981(5) | C17  | C18  | 1.385(5) |
| C1   | C2   | 1.374(5) | C18  | H18  | 0.9500   |
| C1   | C10  | 1.432(5) | C19  | C20  | 1.387(5) |
| C2   | H2   | 0.9500   | C19  | C24  | 1.383(5) |
| C2   | C3   | 1.417(5) | C20  | H20  | 0.9500   |
| C3   | H3   | 0.9500   | C20  | C21  | 1.390(5) |
| C3   | C4   | 1.357(5) | C21  | H21  | 0.9500   |
| C4   | C5   | 1.398(5) | C21  | C22  | 1.374(5) |
| C4   | C11  | 1.510(5) | C22  | H22  | 0.9500   |
| C5   | C6   | 1.425(5) | C22  | C23  | 1.387(5) |
| C5   | C10  | 1.417(5) | C23  | H23  | 0.9500   |
| C6   | C7   | 1.358(5) | C23  | C24  | 1.382(5) |
| C6   | C12  | 1.514(5) | C24  | H24  | 0.9500   |
| C7   | H7   | 0.9500   | C25  | H25A | 0.9800   |
| C7   | C8   | 1.414(5) | C25  | H25B | 0.9800   |
| C8   | H8   | 0.9500   | C25  | H25C | 0.9800   |
| C8   | C9   | 1.381(5) | C26  | H26A | 0.9800   |
| C9   | C10  | 1.423(5) | C26  | H26B | 0.9800   |
| C11  | H11A | 0.9900   | C26  | H26C | 0.9800   |
| C11  | H11B | 0.9900   |      |      |          |

**Table 5 Bond Angles for A21.**

| Atom | Atom | Atom | Angle/°   | Atom | Atom | Atom | Angle/°  |
|------|------|------|-----------|------|------|------|----------|
| O1   | Te1  | Te2  | 167.91(7) | C10  | C9   | Te2  | 119.8(2) |
| O1   | Te1  | C1   | 88.09(13) | C5   | C10  | C1   | 114.6(3) |
| O1   | Te1  | C13  | 91.94(14) | C5   | C10  | C9   | 114.9(3) |
| C1   | Te1  | Te2  | 81.49(11) | C9   | C10  | C1   | 130.4(3) |
| C13  | Te1  | Te2  | 83.29(10) | C4   | C11  | C12  | 105.0(3) |
| C13  | Te1  | C1   | 96.84(13) | C6   | C12  | C11  | 105.4(3) |
| C9   | Te2  | Te1  | 85.36(11) | C14  | C13  | Te1  | 117.6(3) |
| C9   | Te2  | C19  | 96.35(14) | C18  | C13  | Te1  | 120.8(3) |
| C19  | Te2  | Te1  | 97.85(10) | C18  | C13  | C14  | 121.5(4) |
| C25  | O1   | Te1  | 116.4(2)  | C15  | C14  | C13  | 118.7(4) |
| C2   | C1   | Te1  | 116.9(3)  | C16  | C15  | C14  | 119.8(4) |
| C2   | C1   | C10  | 120.3(3)  | C17  | C16  | C15  | 120.9(4) |
| C10  | C1   | Te1  | 122.7(3)  | C16  | C17  | C18  | 119.8(4) |
| C1   | C2   | C3   | 122.6(4)  | C13  | C18  | C17  | 119.2(4) |
| C4   | C3   | C2   | 118.9(4)  | C20  | C19  | Te2  | 118.0(3) |
| C3   | C4   | C5   | 119.0(3)  | C24  | C19  | Te2  | 121.1(3) |
| C3   | C4   | C11  | 131.6(4)  | C24  | C19  | C20  | 121.0(3) |
| C5   | C4   | C11  | 109.4(3)  | C19  | C20  | C21  | 118.5(4) |
| C4   | C5   | C6   | 111.7(3)  | C22  | C21  | C20  | 121.1(4) |
| C4   | C5   | C10  | 124.6(3)  | C21  | C22  | C23  | 119.6(4) |
| C10  | C5   | C6   | 123.7(4)  | C24  | C23  | C22  | 120.3(4) |

**Table 5 Bond Angles for A21.**

| Atom | Atom | Atom | Angle/°  | Atom | Atom | Atom | Angle/°  |
|------|------|------|----------|------|------|------|----------|
| C5   | C6   | C12  | 108.2(4) | C23  | C24  | C19  | 119.5(4) |
| C7   | C6   | C5   | 119.2(3) | F1   | B1   | F2   | 108.6(3) |
| C7   | C6   | C12  | 132.7(4) | F1   | B1   | F3   | 113.0(4) |
| C6   | C7   | C8   | 118.8(3) | F1   | B1   | F4   | 111.4(4) |
| C9   | C8   | C7   | 122.4(4) | F3   | B1   | F2   | 108.9(4) |
| C8   | C9   | Te2  | 119.2(3) | F3   | B1   | F4   | 108.2(3) |
| C8   | C9   | C10  | 121.0(3) | F4   | B1   | F2   | 106.6(4) |

**Table 6 Hydrogen Bonds for A21.**

| D   | H   | A  | d(D-H)/Å | d(H-A)/Å  | d(D-A)/Å | D-H-A/° |
|-----|-----|----|----------|-----------|----------|---------|
| C2  | H2  | O1 | 0.95     | 2.17      | 2.809(4) | 123.1   |
| C20 | H20 | F4 | 0.95     | 2.40      | 3.255(5) | 148.9   |
| O26 | H26 | F1 | 0.981(5) | 1.986(13) | 2.958(5) | 170(6)  |

**Table 7 Torsion Angles for A21.**

| A   | B   | C   | D   | Angle/°   | A   | B   | C   | D   | Angle/°   |
|-----|-----|-----|-----|-----------|-----|-----|-----|-----|-----------|
| Te1 | C1  | C2  | C3  | 179.0(3)  | C6  | C5  | C10 | C9  | 0.1(5)    |
| Te1 | C1  | C10 | C5  | -179.2(3) | C6  | C7  | C8  | C9  | -0.7(6)   |
| Te1 | C1  | C10 | C9  | 0.4(6)    | C7  | C6  | C12 | C11 | -175.3(4) |
| Te1 | C13 | C14 | C15 | 177.3(3)  | C7  | C8  | C9  | Te2 | 176.9(3)  |
| Te1 | C13 | C18 | C17 | -176.8(3) | C7  | C8  | C9  | C10 | -1.3(6)   |
| Te2 | C9  | C10 | C1  | 3.7(6)    | C8  | C9  | C10 | C1  | -178.1(4) |
| Te2 | C9  | C10 | C5  | -176.7(2) | C8  | C9  | C10 | C5  | 1.6(5)    |
| Te2 | C19 | C20 | C21 | -178.2(3) | C10 | C1  | C2  | C3  | 1.2(6)    |
| Te2 | C19 | C24 | C23 | 177.9(3)  | C10 | C5  | C6  | C7  | -2.1(6)   |
| C1  | C2  | C3  | C4  | 0.0(6)    | C10 | C5  | C6  | C12 | 177.9(3)  |
| C2  | C1  | C10 | C5  | -1.5(5)   | C11 | C4  | C5  | C6  | -0.2(5)   |
| C2  | C1  | C10 | C9  | 178.2(4)  | C11 | C4  | C5  | C10 | 179.0(4)  |
| C2  | C3  | C4  | C5  | -0.8(6)   | C12 | C6  | C7  | C8  | -177.7(4) |
| C2  | C3  | C4  | C11 | -179.1(4) | C13 | C14 | C15 | C16 | -0.5(6)   |
| C3  | C4  | C5  | C6  | -178.8(3) | C14 | C13 | C18 | C17 | 0.1(5)    |
| C3  | C4  | C5  | C10 | 0.4(6)    | C14 | C15 | C16 | C17 | 0.4(6)    |
| C3  | C4  | C11 | C12 | -178.5(4) | C15 | C16 | C17 | C18 | 0.0(6)    |
| C4  | C5  | C6  | C7  | 177.1(3)  | C16 | C17 | C18 | C13 | -0.3(6)   |
| C4  | C5  | C6  | C12 | -2.9(5)   | C18 | C13 | C14 | C15 | 0.2(5)    |
| C4  | C5  | C10 | C1  | 0.7(5)    | C19 | C20 | C21 | C22 | 0.7(6)    |
| C4  | C5  | C10 | C9  | -179.0(4) | C20 | C19 | C24 | C23 | -0.8(6)   |
| C4  | C11 | C12 | C6  | -4.6(4)   | C20 | C21 | C22 | C23 | -1.7(6)   |
| C5  | C4  | C11 | C12 | 3.1(5)    | C21 | C22 | C23 | C24 | 1.4(6)    |
| C5  | C6  | C7  | C8  | 2.4(6)    | C22 | C23 | C24 | C19 | -0.2(6)   |
| C5  | C6  | C12 | C11 | 4.6(4)    | C24 | C19 | C20 | C21 | 0.5(6)    |
| C6  | C5  | C10 | C1  | 179.8(3)  |     |     |     |     |           |

**Table 8 Hydrogen Atom Coordinates ( $\text{\AA} \times 10^4$ ) and Isotropic Displacement Parameters ( $\text{\AA}^2 \times 10^3$ ) for A21.**

**Table 7 Torsion Angles for A21.**

| A    | B | C | D | Angle/°  | A | B        | C | D | Angle/°  | U(eq)   |
|------|---|---|---|----------|---|----------|---|---|----------|---------|
| Atom |   |   |   | x        |   | y        |   |   | z        |         |
| H2   |   |   |   | 1597.47  |   | 4884.32  |   |   | -1312.51 | 30      |
| H3   |   |   |   | 811.74   |   | 4802.14  |   |   | -3053.62 | 34      |
| H7   |   |   |   | -2413.09 |   | -584.28  |   |   | 521.99   | 32      |
| H8   |   |   |   | -1734.37 |   | -666.4   |   |   | 2375.05  | 32      |
| H11A |   |   |   | -289.05  |   | 2577.49  |   |   | -3421.37 | 40      |
| H11B |   |   |   | -1436.74 |   | 3583.99  |   |   | -3456.61 | 40      |
| H12A |   |   |   | -2675.24 |   | 1787.92  |   |   | -2151.75 | 35      |
| H12B |   |   |   | -1569.39 |   | 783.83   |   |   | -2215.01 | 35      |
| H14  |   |   |   | 3402.7   |   | 2607.61  |   |   | -18.31   | 34      |
| H15  |   |   |   | 5064.1   |   | 1036.7   |   |   | 307.11   | 45      |
| H16  |   |   |   | 5574.97  |   | -477.29  |   |   | 2365.75  | 48      |
| H17  |   |   |   | 4441.15  |   | -470.53  |   |   | 4110.94  | 42      |
| H18  |   |   |   | 2769.25  |   | 1070.14  |   |   | 3802.09  | 32      |
| H20  |   |   |   | -992.36  |   | 2430.49  |   |   | 4755.66  | 32      |
| H21  |   |   |   | -2780.35 |   | 3543.29  |   |   | 5109.06  | 37      |
| H22  |   |   |   | -4619.86 |   | 3701.18  |   |   | 4129.36  | 37      |
| H23  |   |   |   | -4662.63 |   | 2845.97  |   |   | 2691.45  | 42      |
| H24  |   |   |   | -2888.82 |   | 1748.41  |   |   | 2309.94  | 37      |
| H25A |   |   |   | 4064.3   |   | 5017.97  |   |   | 1063.4   | 48      |
| H25B |   |   |   | 2897.4   |   | 5954.66  |   |   | 1108.67  | 48      |
| H25C |   |   |   | 3793.02  |   | 6428.5   |   |   | -171.26  | 48      |
| H26A |   |   |   | 5397.71  |   | 2450.42  |   |   | 7560.02  | 85      |
| H26B |   |   |   | 5086.48  |   | 3820.32  |   |   | 7657.41  | 85      |
| H26C |   |   |   | 4904.95  |   | 3779.82  |   |   | 6366.12  | 85      |
| H26  |   |   |   | 3160(60) |   | 3050(70) |   |   | 6950(40) | 150(30) |

**X-ray Crystallographic Structure determination on A22**Data Collection

A colorless prism crystal of  $C_{48}H_{36}B_2F_8OSe_2Te_2 \cdot 1.7CH_2Cl_2$  having approximate dimensions of 0.050 x 0.050 x 0.050 mm was mounted in a loop. All measurements were made on a Rigaku Mercury70 diffractometer Mo-K $\alpha$  radiation.

Cell constants and an orientation matrix for data collection corresponded to a primitive monoclinic cell with dimensions:

$$\begin{aligned}
 a &= 12.11690 \text{ \AA} \\
 b &= 19.87480 \text{ \AA} \quad b = 95.19600 \text{ o} \\
 c &= 20.93930 \text{ \AA} \\
 V &= 5021.90086 \text{ \AA}^3
 \end{aligned}$$

For Z = 4 and F.W. = 1300.47, the calculated density is 1.720 g/cm<sup>3</sup>. The reflection conditions of:

$$\begin{aligned}
 h0l: & h+l = 2n \\
 0k0: & k = 2n
 \end{aligned}$$

uniquely determine the space group to be:

P21/n (#14)

The data were collected at a temperature of  $-180 \pm 10$ °C to a maximum 2 $\theta$  value of 50.7°.

Data Reduction

Of the 31003 reflections were collected, where 9151 were unique (Rint = 0.1050); equivalent reflections

were merged. Data were collected and processed using CrystalClear (Rigaku). 1 The linear absorption coefficient,  $\mu$ , for Mo-K $\alpha$  radiation is 27.833 cm<sup>-1</sup>. An empirical absorption correction was applied which resulted in transmission factors ranging from 0.476 to 0.870. The data were corrected for Lorentz and polarization effects.

#### Structure Solution and Refinement

The structure was solved by direct methods<sup>2</sup> and expanded using Fourier techniques. The non-hydrogen atoms were refined anisotropically. Hydrogen atoms were refined using the riding model. The final cycle of full-matrix least-squares refinement<sup>3</sup> on F<sup>2</sup> was based on 9151 observed reflections and 622 variable parameters and converged (largest parameter shift was 0.00 times its esd) with unweighted and weighted agreement factors of:

$$R1 = \sum ||Fo| - |Fc|| / \sum |Fo| = 0.0884$$

$$wR2 = [ \sum (w (Fo^2 - Fc^2)^2) / \sum w(Fo^2)^2 ]^{1/2} = 0.2646$$

The goodness of fit<sup>4</sup> was 1.05. Unit weights were used. The maximum and minimum peaks on the final difference Fourier map corresponded to 1.58 and -1.10 e<sup>-</sup>/Å<sup>3</sup>, respectively.

Neutral atom scattering factors were taken from International Tables for Crystallography (IT), Vol. C, Table 6.1.1.4 5. Anomalous dispersion effects were included in Fcalc<sup>6</sup>; the values for Df' and Df'' were those of Creagh and McAuley<sup>7</sup>. The values for the mass attenuation coefficients are those of Creagh and Hubbell<sup>8</sup>. All calculations were performed using the CrystalStructure<sup>9</sup> crystallographic software package except for refinement, which was performed using SHELXL Version 2018/310.

Further refinement was undertaken with SHELXL within the Olex2 v. 1.5 suite.<sup>11</sup>

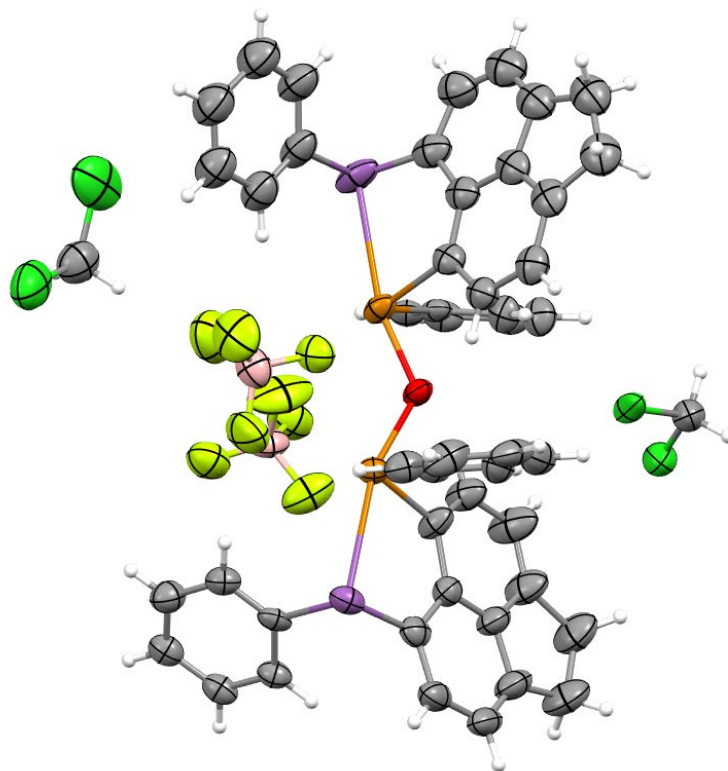

**Figure S41.** Displacement ellipsoids (40%) plot of the asymmetric unit of the structure of **A22**, showing the location of the two CH<sub>2</sub>Cl<sub>2</sub> solvent molecules, when refined to 0.5 occupancy (the total solvent content corresponds more closely to an occupancy of 0.85, but this did not refine well).

During the refinement, the two CH<sub>2</sub>Cl<sub>2</sub> solvents of crystallization, which are well separated from the cations and anions in the lattice, could be located but did not refine well. Employment of a solvent mask indicated an overall occupancy of 1.7 CH<sub>2</sub>Cl<sub>2</sub> per asymmetric unit, but it did not prove possible to reliably assign this to the two location. In view of the limited data quality, the decision was taken to reserve the data for refining the cation and anions of the chemical unit, and the solvents were treated via the successful solvent mask.

**Table 1 Crystal data and structure refinement for A22.**

|                                             |                                                                                                                                    |
|---------------------------------------------|------------------------------------------------------------------------------------------------------------------------------------|
| Identification code                         | A22                                                                                                                                |
| Empirical formula                           | C <sub>48</sub> H <sub>36</sub> B <sub>2</sub> F <sub>8</sub> OSe <sub>2</sub> Te <sub>2</sub> ·1.7CH <sub>2</sub> Cl <sub>2</sub> |
| Formula weight                              | 1359.91                                                                                                                            |
| Temperature/K                               | 93.15                                                                                                                              |
| Crystal system                              | monoclinic                                                                                                                         |
| Space group                                 | P2 <sub>1</sub> /n                                                                                                                 |
| a/Å                                         | 12.117(3)                                                                                                                          |
| b/Å                                         | 19.875(5)                                                                                                                          |
| c/Å                                         | 20.939(5)                                                                                                                          |
| α/°                                         | 90                                                                                                                                 |
| β/°                                         | 95.196(7)                                                                                                                          |
| γ/°                                         | 90                                                                                                                                 |
| Volume/Å <sup>3</sup>                       | 5022(2)                                                                                                                            |
| Z                                           | 4                                                                                                                                  |
| ρ <sub>calc</sub> /g/cm <sup>3</sup>        | 1.799                                                                                                                              |
| μ/mm <sup>-1</sup>                          | 2.674                                                                                                                              |
| F(000)                                      | 2344.0                                                                                                                             |
| Crystal size/mm <sup>3</sup>                | 0.05 × 0.05 × 0.05                                                                                                                 |
| Radiation                                   | MoKα (λ = 0.71075)                                                                                                                 |
| 2θ range for data collection/°              | 3.744 to 50.68                                                                                                                     |
| Index ranges                                | -14 ≤ h ≤ 14, -23 ≤ k ≤ 14, -25 ≤ l ≤ 23                                                                                           |
| Reflections collected                       | 30990                                                                                                                              |
| Independent reflections                     | 9146 [R <sub>int</sub> = 0.1053, R <sub>sigma</sub> = 0.1052]                                                                      |
| Data/restraints/parameters                  | 9146/976/713                                                                                                                       |
| Goodness-of-fit on F <sup>2</sup>           | 1.038                                                                                                                              |
| Final R indexes [I ≥ 2σ (I)]                | R <sub>1</sub> = 0.0781, wR <sub>2</sub> = 0.2064                                                                                  |
| Final R indexes [all data]                  | R <sub>1</sub> = 0.1150, wR <sub>2</sub> = 0.2312                                                                                  |
| Largest diff. peak/hole / e Å <sup>-3</sup> | 1.64/-0.83                                                                                                                         |

**Table 2 Fractional Atomic Coordinates (×10<sup>4</sup>) and Equivalent Isotropic Displacement Parameters (Å<sup>2</sup>×10<sup>3</sup>) for A22. U<sub>eq</sub> is defined as 1/3 of the trace of the orthogonalised U<sub>ij</sub> tensor.**

| Atom | x          | y         | z         | U(eq)    |
|------|------------|-----------|-----------|----------|
| Te1  | 189.3(5)   | 2091.8(3) | 8091.0(3) | 47.7(2)  |
| Te2  | 1484.3(6)  | 3696.3(4) | 8203.2(3) | 55.1(2)  |
| Se1  | -1086.3(9) | 852.7(6)  | 7831.2(5) | 56.8(3)  |
| Se2  | 2354(7)    | 5091(3)   | 8108(5)   | 67.7(18) |
| F1   | -957(6)    | 3464(4)   | 8001(3)   | 82(2)    |
| F2   | -1310(11)  | 3827(6)   | 6993(5)   | 146(4)   |
| F3   | -2089(8)   | 2818(5)   | 7352(5)   | 131(4)   |
| F4   | -2650(7)   | 3868(6)   | 7594(5)   | 126(3)   |
| F5   | 1603(7)    | 1896(4)   | 6968(4)   | 104(3)   |
| F6   | 2880(8)    | 2624(5)   | 6618(4)   | 104(3)   |
| F7   | 1267(11)   | 2990(5)   | 6967(5)   | 149(4)   |
| F8   | 1296(7)    | 2421(4)   | 6018(4)   | 97(2)    |
| O1   | 1176(5)    | 2782(3)   | 8508(3)   | 51.5(16) |
| C1   | 1423(9)    | 1379(6)   | 8348(5)   | 60(3)    |
| C2   | 2497(10)   | 1565(7)   | 8489(6)   | 76(3)    |

**Table 2 Fractional Atomic Coordinates ( $\times 10^4$ ) and Equivalent Isotropic Displacement Parameters ( $\text{\AA}^2 \times 10^3$ ) for A22.  $U_{\text{eq}}$  is defined as 1/3 of the trace of the orthogonalised  $U_{ij}$  tensor.**

| Atom | x         | y        | z         | U(eq)  |
|------|-----------|----------|-----------|--------|
| C3   | 3362(12)  | 1122(8)  | 8728(8)   | 98(5)  |
| C4   | 3130(12)  | 474(7)   | 8782(7)   | 89(4)  |
| C5   | 2016(11)  | 236(6)   | 8624(5)   | 69(3)  |
| C6   | 1916(13)  | -459(6)  | 8717(6)   | 79(3)  |
| C7   | 889(14)   | -745(6)  | 8571(5)   | 83(3)  |
| C8   | 24(13)    | -345(6)  | 8311(5)   | 79(3)  |
| C9   | 169(10)   | 345(6)   | 8214(4)   | 61(2)  |
| C10  | 1164(9)   | 662(6)   | 8387(3)   | 60(2)  |
| C11  | 3820(15)  | -119(8)  | 9045(8)   | 106(5) |
| C12  | 3005(14)  | -727(8)  | 8995(8)   | 107(5) |
| C13  | -632(10)  | 2037(5)  | 8943(5)   | 56(2)  |
| C14  | -6(13)    | 1941(6)  | 9515(5)   | 81(3)  |
| C15  | -447(14)  | 1978(7)  | 10082(6)  | 84(4)  |
| C16  | -1531(14) | 2120(6)  | 10089(6)  | 86(3)  |
| C17  | -2173(13) | 2210(7)  | 9520(7)   | 85(3)  |
| C18  | -1761(11) | 2180(6)  | 8925(6)   | 70(3)  |
| C19  | -840(8)   | 755(5)   | 6932(4)   | 48(2)  |
| C20  | -417(8)   | 168(5)   | 6712(5)   | 54(2)  |
| C21  | -341(8)   | 102(6)   | 6050(5)   | 58(2)  |
| C22  | -695(8)   | 616(6)   | 5635(5)   | 59(2)  |
| C23  | -1141(11) | 1196(6)  | 5877(5)   | 71(3)  |
| C24  | -1181(9)  | 1270(6)  | 6531(5)   | 60(2)  |
| C31  | 1303(8)   | 4107(6)  | 9123(5)   | 58(2)  |
| C32  | 771(7)    | 3715(6)  | 9551(5)   | 65(3)  |
| C33  | 712(9)    | 3932(7)  | 10176(6)  | 72(3)  |
| C34  | 1200(20)  | 4544(10) | 10424(9)  | 66(4)  |
| C35  | 1680(20)  | 4916(10) | 9997(10)  | 64(5)  |
| C36  | 2150(20)  | 5523(11) | 10311(12) | 74(5)  |
| C37  | 2684(18)  | 5912(10) | 9921(12)  | 66(5)  |
| C38  | 2755(19)  | 5788(10) | 9318(12)  | 65(5)  |
| C39  | 2325(17)  | 5231(9)  | 9022(8)   | 58(4)  |
| C40  | 1770(20)  | 4730(10) | 9367(9)   | 59(4)  |
| C41  | 1250(20)  | 4864(12) | 11079(10) | 81(5)  |
| C42  | 1840(20)  | 5484(13) | 11001(12) | 86(6)  |
| C43  | 3220(9)   | 3494(5)  | 8393(5)   | 51(2)  |
| C44  | 3641(9)   | 3325(6)  | 9014(5)   | 61(3)  |
| C45  | 4742(10)  | 3168(7)  | 9126(6)   | 72(3)  |
| C46  | 5408(9)   | 3180(6)  | 8627(6)   | 65(3)  |
| C47  | 4971(10)  | 3338(6)  | 8022(6)   | 68(3)  |
| C48  | 3849(9)   | 3487(6)  | 7911(5)   | 60(2)  |
| C49  | 930(30)   | 5420(20) | 7600(15)  | 80(7)  |
| C50  | 906(15)   | 6248(9)  | 8050(10)  | 52(4)  |
| C51  | -63(17)   | 6608(11) | 7903(11)  | 70(5)  |
| C52  | -941(17)  | 6266(11) | 7517(11)  | 69(5)  |
| C53  | -900(15)  | 5600(10) | 7373(9)   | 59(4)  |

**Table 2 Fractional Atomic Coordinates ( $\times 10^4$ ) and Equivalent Isotropic Displacement Parameters ( $\text{\AA}^2 \times 10^3$ ) for A22.  $U_{\text{eq}}$  is defined as 1/3 of the trace of the orthogonalised  $U_{ij}$  tensor.**

| Atom | x         | y        | z         | $U(\text{eq})$ |
|------|-----------|----------|-----------|----------------|
| C54  | 83(14)    | 5240(9)  | 7541(8)   | 46(4)          |
| B1   | -1792(14) | 3466(10) | 7504(7)   | 84(3)          |
| B2   | 1730(15)  | 2484(7)  | 6605(8)   | 74(3)          |
| Se2A | 2322(11)  | 5035(5)  | 7940(6)   | 77(3)          |
| C50A | 890(30)   | 6110(20) | 7739(17)  | 88(7)          |
| C51A | -80(30)   | 6467(16) | 7561(19)  | 95(8)          |
| C52A | -900(30)  | 6076(17) | 7170(20)  | 99(8)          |
| C53A | -860(30)  | 5394(17) | 7099(18)  | 93(7)          |
| C54A | 150(30)   | 5065(19) | 7299(17)  | 93(8)          |
| C34A | 1250(30)  | 4599(13) | 10293(12) | 73(6)          |
| C35A | 1740(30)  | 4939(12) | 9846(11)  | 58(5)          |
| C36A | 2220(20)  | 5578(12) | 10088(14) | 64(6)          |
| C37A | 2710(20)  | 5928(13) | 9652(15)  | 66(6)          |
| C38A | 2780(20)  | 5766(13) | 9058(15)  | 69(6)          |
| C39A | 2330(30)  | 5189(13) | 8810(10)  | 66(5)          |
| C40A | 1810(30)  | 4741(11) | 9219(11)  | 57(5)          |
| C41A | 1430(30)  | 4991(13) | 10924(12) | 72(6)          |
| C42A | 1990(30)  | 5609(13) | 10786(13) | 68(6)          |
| C49A | 971(15)   | 5565(9)  | 7874(8)   | 43(4)          |

**Table 3 Anisotropic Displacement Parameters ( $\text{\AA}^2 \times 10^3$ ) for A22. The Anisotropic displacement factor exponent takes the form:  $-2\pi^2[h^2a^2U_{11}+2hka*b*U_{12}+\dots]$ .**

| Atom | $U_{11}$ | $U_{22}$ | $U_{33}$ | $U_{23}$ | $U_{13}$ | $U_{12}$ |
|------|----------|----------|----------|----------|----------|----------|
| Te1  | 44.7(4)  | 43.9(4)  | 55.8(4)  | -0.7(3)  | 11.7(3)  | -3.8(3)  |
| Te2  | 44.1(4)  | 48.4(4)  | 72.4(5)  | 15.1(3)  | 3.4(3)   | -6.2(3)  |
| Se1  | 59.8(7)  | 54.8(7)  | 57.9(6)  | -14.0(5) | 17.6(5)  | -13.0(5) |
| Se2  | 45.5(18) | 32.7(19) | 124(5)   | 18(2)    | 1(3)     | -5.9(12) |
| F1   | 62(4)    | 87(6)    | 96(4)    | -6(4)    | 1(3)     | 1(4)     |
| F2   | 158(10)  | 176(11)  | 106(6)   | 7(6)     | 26(6)    | -26(8)   |
| F3   | 111(7)   | 113(7)   | 157(8)   | -21(6)   | -51(6)   | -1(5)    |
| F4   | 59(5)    | 152(9)   | 167(8)   | 4(7)     | 3(5)     | 19(5)    |
| F5   | 94(6)    | 86(5)    | 141(6)   | 25(5)    | 61(5)    | 17(5)    |
| F6   | 108(6)   | 104(7)   | 104(5)   | -7(5)    | 29(4)    | -36(5)   |
| F7   | 216(12)  | 71(6)    | 181(8)   | -14(5)   | 140(8)   | 19(7)    |
| F8   | 87(5)    | 89(6)    | 115(5)   | 0(4)     | 13(4)    | -17(5)   |
| O1   | 50(4)    | 41(4)    | 62(4)    | 10(3)    | -4(3)    | -7(3)    |
| C1   | 44(5)    | 54(5)    | 82(7)    | 21(5)    | 4(5)     | 5(4)     |
| C2   | 53(6)    | 60(7)    | 117(9)   | 11(6)    | 12(6)    | 4(5)     |
| C3   | 51(7)    | 72(7)    | 168(14)  | 17(8)    | 6(8)     | 11(5)    |
| C4   | 80(7)    | 65(6)    | 123(10)  | 7(7)     | 7(7)     | 17(5)    |
| C5   | 87(6)    | 44(5)    | 76(7)    | 9(5)     | 13(6)    | 5(4)     |
| C6   | 118(8)   | 47(6)    | 72(7)    | 12(5)    | 16(7)    | 8(5)     |
| C7   | 141(9)   | 49(7)    | 58(7)    | 0(5)     | 12(7)    | -12(6)   |
| C8   | 119(9)   | 62(6)    | 54(6)    | -7(5)    | 7(6)     | -23(6)   |

**Table 3 Anisotropic Displacement Parameters ( $\text{\AA}^2 \times 10^3$ ) for A22. The Anisotropic displacement factor exponent takes the form:  $-2\pi^2[h^2a^2U_{11}+2hka^*b^*U_{12}+\dots]$ .**

| Atom | $U_{11}$ | $U_{22}$ | $U_{33}$ | $U_{23}$ | $U_{13}$ | $U_{12}$ |
|------|----------|----------|----------|----------|----------|----------|
| C9   | 81(6)    | 63(6)    | 39(5)    | -2(4)    | 12(5)    | -10(5)   |
| C10  | 73(6)    | 51(5)    | 57(6)    | 2(4)     | 6(5)     | 3(4)     |
| C11  | 108(9)   | 88(9)    | 122(11)  | 28(9)    | 5(9)     | 23(7)    |
| C12  | 125(10)  | 63(8)    | 134(12)  | 24(8)    | 18(9)    | 19(7)    |
| C13  | 70(5)    | 41(6)    | 58(5)    | -15(4)   | 17(4)    | -13(5)   |
| C14  | 118(9)   | 73(9)    | 53(5)    | 2(5)     | 13(5)    | -9(7)    |
| C15  | 125(9)   | 73(9)    | 56(5)    | 8(5)     | 15(6)    | -21(8)   |
| C16  | 148(10)  | 40(7)    | 77(6)    | 1(5)     | 56(6)    | -1(8)    |
| C17  | 95(9)    | 63(8)    | 104(7)   | 8(7)     | 50(6)    | 13(7)    |
| C18  | 80(6)    | 54(7)    | 79(6)    | -4(5)    | 29(5)    | 3(6)     |
| C19  | 44(5)    | 41(5)    | 60(5)    | -14(3)   | 11(4)    | -15(4)   |
| C20  | 53(6)    | 50(5)    | 59(5)    | -12(4)   | 11(4)    | -4(5)    |
| C21  | 46(6)    | 65(7)    | 65(5)    | -18(4)   | 15(4)    | -6(5)    |
| C22  | 51(6)    | 68(6)    | 58(5)    | -12(4)   | 9(4)     | -12(5)   |
| C23  | 81(8)    | 61(7)    | 70(5)    | 1(5)     | 7(5)     | -2(6)    |
| C24  | 62(7)    | 46(6)    | 73(5)    | -5(4)    | 15(5)    | -1(5)    |
| C31  | 46(5)    | 54(5)    | 75(6)    | -6(4)    | 12(4)    | 12(4)    |
| C32  | 58(7)    | 60(6)    | 76(6)    | 2(4)     | 1(5)     | 1(5)     |
| C33  | 56(7)    | 85(7)    | 76(6)    | 8(5)     | 7(5)     | 13(5)    |
| C34  | 46(8)    | 81(7)    | 70(7)    | 1(5)     | 1(6)     | 26(6)    |
| C35  | 54(9)    | 68(7)    | 71(6)    | -2(5)    | 1(6)     | 19(6)    |
| C36  | 67(9)    | 81(8)    | 73(8)    | -7(6)    | 2(7)     | 16(6)    |
| C37  | 59(8)    | 66(8)    | 71(7)    | -12(6)   | 1(6)     | 20(6)    |
| C38  | 61(8)    | 65(8)    | 67(7)    | -13(6)   | -3(7)    | 3(6)     |
| C39  | 50(7)    | 53(7)    | 70(7)    | -6(6)    | 1(7)     | 7(6)     |
| C40  | 47(8)    | 59(7)    | 70(7)    | -1(5)    | 0(6)     | 8(6)     |
| C41  | 81(10)   | 92(9)    | 73(7)    | 1(6)     | 18(7)    | 25(7)    |
| C42  | 83(10)   | 92(9)    | 82(8)    | -12(7)   | 5(7)     | 16(7)    |
| C43  | 54(5)    | 33(5)    | 65(5)    | -2(4)    | 5(4)     | -7(4)    |
| C44  | 45(5)    | 69(8)    | 71(5)    | 9(5)     | 8(4)     | 2(5)     |
| C45  | 59(6)    | 78(9)    | 77(6)    | 3(6)     | 2(5)     | 12(6)    |
| C46  | 43(5)    | 60(7)    | 93(6)    | -8(5)    | 11(4)    | 0(5)     |
| C47  | 56(5)    | 69(8)    | 80(6)    | -14(5)   | 18(5)    | -5(6)    |
| C48  | 58(5)    | 51(7)    | 72(6)    | 1(5)     | 13(4)    | -11(5)   |
| C49  | 75(9)    | 80(9)    | 84(11)   | 14(8)    | 8(8)     | 3(7)     |
| C50  | 59(7)    | 40(6)    | 57(8)    | 9(6)     | 12(6)    | -7(5)    |
| C51  | 73(8)    | 63(8)    | 74(9)    | 7(7)     | 7(7)     | 11(6)    |
| C52  | 71(8)    | 59(7)    | 75(9)    | 17(6)    | 0(7)     | 10(6)    |
| C53  | 54(7)    | 61(7)    | 62(8)    | 12(6)    | 11(6)    | 4(6)     |
| C54  | 49(7)    | 42(7)    | 47(7)    | 12(6)    | 13(5)    | -5(5)    |
| B1   | 67(8)    | 107(9)   | 75(8)    | -8(7)    | 5(5)     | 7(6)     |
| B2   | 91(7)    | 46(7)    | 92(7)    | -12(5)   | 41(6)    | -1(6)    |
| Se2A | 52(3)    | 95(5)    | 85(4)    | 48(3)    | 11(3)    | -6(3)    |
| C50A | 87(9)    | 83(9)    | 96(12)   | 10(8)    | 8(8)     | 1(7)     |
| C51A | 91(10)   | 87(10)   | 107(12)  | 8(8)     | 8(8)     | 5(7)     |



**Table 3 Anisotropic Displacement Parameters ( $\text{\AA}^2 \times 10^3$ ) for A22. The Anisotropic displacement factor exponent takes the form:  $-2\pi^2[h^2a^*U_{11}+2hka^*b^*U_{12}+\dots]$ .**

| Atom | $U_{11}$ | $U_{22}$ | $U_{33}$ | $U_{23}$ | $U_{13}$ | $U_{12}$ |
|------|----------|----------|----------|----------|----------|----------|
| C52A | 93(10)   | 94(9)    | 107(12)  | 9(8)     | 4(8)     | 6(7)     |
| C53A | 85(9)    | 93(9)    | 100(12)  | 10(8)    | 9(8)     | -5(7)    |
| C54A | 93(10)   | 91(10)   | 94(12)   | 1(8)     | 0(8)     | 2(7)     |
| C34A | 66(10)   | 81(8)    | 71(8)    | 1(6)     | 7(7)     | 8(7)     |
| C35A | 45(9)    | 61(8)    | 66(7)    | 1(5)     | -2(7)    | 16(7)    |
| C36A | 62(10)   | 67(8)    | 66(8)    | 0(6)     | 11(7)    | 8(7)     |
| C37A | 62(10)   | 70(9)    | 68(8)    | 1(6)     | 11(7)    | 6(7)     |
| C38A | 68(10)   | 69(8)    | 71(8)    | -2(7)    | 17(7)    | 0(7)     |
| C39A | 66(5)    | 66(5)    | 67(5)    | 0.3(10)  | 6.0(11)  | 0.1(10)  |
| C40A | 50(10)   | 57(7)    | 64(7)    | 1(6)     | 3(7)     | 9(7)     |
| C41A | 70(10)   | 74(9)    | 72(8)    | 7(6)     | 10(7)    | 14(8)    |
| C42A | 68(10)   | 74(9)    | 61(8)    | -1(7)    | 8(7)     | 11(7)    |
| C49A | 47(6)    | 37(6)    | 46(7)    | 17(5)    | 8(6)     | -4(5)    |

**Table 4 Bond Lengths for A22.**

| Atom Atom | Length/ $\text{\AA}$ | Atom Atom | Length/ $\text{\AA}$ |
|-----------|----------------------|-----------|----------------------|
| Te1 Se1   | 2.9321(14)           | C33 H33A  | 0.9500               |
| Te1 O1    | 1.972(6)             | C33 C34   | 1.43(2)              |
| Te1 C1    | 2.094(10)            | C33 C34A  | 1.49(2)              |
| Te1 C13   | 2.123(10)            | C34 C35   | 1.33(2)              |
| Te2 Se2   | 2.978(5)             | C34 C41   | 1.51(2)              |
| Te2 O1    | 1.973(6)             | C35 C36   | 1.46(2)              |
| Te2 C31   | 2.121(11)            | C35 C40   | 1.38(2)              |
| Te2 C43   | 2.143(11)            | C36 C37   | 1.34(3)              |
| Te2 Se2A  | 2.918(9)             | C36 C42   | 1.53(3)              |
| Se1 C9    | 1.938(12)            | C37 H37   | 0.9500               |
| Se1 C19   | 1.944(9)             | C37 C38   | 1.30(2)              |
| Se2 C39   | 1.937(15)            | C38 H38   | 0.9500               |
| Se2 C49A  | 1.95(2)              | C38 C39   | 1.35(2)              |
| F1 B1     | 1.384(16)            | C39 C40   | 1.43(2)              |
| F2 B1     | 1.45(2)              | C41 H41A  | 0.9900               |
| F3 B1     | 1.37(2)              | C41 H41B  | 0.9900               |
| F4 B1     | 1.338(19)            | C41 C42   | 1.44(3)              |
| F5 B2     | 1.409(17)            | C42 H42A  | 0.9900               |
| F6 B2     | 1.419(19)            | C42 H42B  | 0.9900               |
| F7 B2     | 1.406(16)            | C43 C44   | 1.394(14)            |
| F8 B2     | 1.299(17)            | C43 C48   | 1.319(15)            |
| C1 C2     | 1.360(16)            | C44 H44   | 0.9500               |
| C1 C10    | 1.462(15)            | C44 C45   | 1.369(15)            |
| C2 H2     | 0.9500               | C45 H45   | 0.9500               |
| C2 C3     | 1.423(17)            | C45 C46   | 1.376(17)            |
| C3 H3     | 0.9500               | C46 H46   | 0.9500               |
| C3 C4     | 1.33(2)              | C46 C47   | 1.365(16)            |
| C4 C5     | 1.439(19)            | C47 H47   | 0.9500               |

**Table 4 Bond Lengths for A22.**

| Atom | Atom | Length/Å  | Atom | Atom | Length/Å  |
|------|------|-----------|------|------|-----------|
| C4   | C11  | 1.519(19) | C47  | C48  | 1.390(16) |
| C5   | C6   | 1.403(16) | C48  | H48  | 0.9500    |
| C5   | C10  | 1.392(16) | C49  | Se2A | 1.93(4)   |
| C6   | C7   | 1.38(2)   | C49  | C50A | 1.41(5)   |
| C6   | C12  | 1.49(2)   | C49  | C54A | 1.30(5)   |
| C7   | H7   | 0.9500    | C50  | H50  | 0.9500    |
| C7   | C8   | 1.387(19) | C50  | C51  | 1.39(2)   |
| C8   | H8   | 0.9500    | C50  | C49A | 1.41(3)   |
| C8   | C9   | 1.400(17) | C51  | H51  | 0.9500    |
| C9   | C10  | 1.379(16) | C51  | C52  | 1.45(3)   |
| C11  | H11A | 0.9900    | C52  | H52  | 0.9500    |
| C11  | H11B | 0.9900    | C52  | C53  | 1.36(3)   |
| C11  | C12  | 1.56(2)   | C53  | H53  | 0.9500    |
| C12  | H12A | 0.9900    | C53  | C54  | 1.41(2)   |
| C12  | H12B | 0.9900    | C54  | H54  | 0.9500    |
| C13  | C14  | 1.371(16) | C54  | C49A | 1.39(2)   |
| C13  | C18  | 1.394(16) | Se2A | C39A | 1.848(16) |
| C14  | H14  | 0.9500    | C50A | H50A | 0.9500    |
| C14  | C15  | 1.348(18) | C50A | C51A | 1.39(3)   |
| C15  | H15  | 0.9500    | C51A | H51A | 0.9500    |
| C15  | C16  | 1.34(2)   | C51A | C52A | 1.45(3)   |
| C16  | H16  | 0.9500    | C52A | H52A | 0.9500    |
| C16  | C17  | 1.375(19) | C52A | C53A | 1.36(3)   |
| C17  | H17  | 0.9500    | C53A | H53A | 0.9500    |
| C17  | C18  | 1.385(17) | C53A | C54A | 1.41(2)   |
| C18  | H18  | 0.9500    | C54A | H54A | 0.9500    |
| C19  | C20  | 1.369(14) | C34A | C35A | 1.34(2)   |
| C19  | C24  | 1.364(14) | C34A | C41A | 1.53(2)   |
| C20  | H20  | 0.9500    | C35A | C36A | 1.47(2)   |
| C20  | C21  | 1.403(14) | C35A | C40A | 1.38(2)   |
| C21  | H21  | 0.9500    | C36A | C37A | 1.33(3)   |
| C21  | C22  | 1.384(16) | C36A | C42A | 1.51(3)   |
| C22  | H22  | 0.9500    | C37A | H37A | 0.9500    |
| C22  | C23  | 1.388(16) | C37A | C38A | 1.30(3)   |
| C23  | H23  | 0.9500    | C38A | H38A | 0.9500    |
| C23  | C24  | 1.383(15) | C38A | C39A | 1.35(2)   |
| C24  | H24  | 0.9500    | C39A | C40A | 1.42(2)   |
| C31  | C32  | 1.388(16) | C41A | H41C | 0.9900    |
| C31  | C40  | 1.438(18) | C41A | H41D | 0.9900    |
| C31  | C40A | 1.409(19) | C41A | C42A | 1.45(3)   |
| C32  | H32  | 0.9500    | C42A | H42C | 0.9900    |
| C32  | C33  | 1.386(16) | C42A | H42D | 0.9900    |
| C33  | H33  | 0.9500    |      |      |           |

**Table 5 Bond Angles for A22.**

| Atom | Atom | Atom | Angle/°    | Atom | Atom | Atom | Angle/°   |
|------|------|------|------------|------|------|------|-----------|
| O1   | Te1  | Se1  | 162.78(17) | C34  | C35  | C40  | 124.6(16) |
| O1   | Te1  | C1   | 88.1(4)    | C40  | C35  | C36  | 126.1(17) |
| O1   | Te1  | C13  | 88.6(3)    | C35  | C36  | C42  | 105.5(17) |
| C1   | Te1  | Se1  | 80.3(3)    | C37  | C36  | C35  | 113.0(19) |
| C1   | Te1  | C13  | 97.3(4)    | C37  | C36  | C42  | 141.6(19) |
| C13  | Te1  | Se1  | 80.4(2)    | C38  | C37  | C36  | 124.4(19) |
| O1   | Te2  | Se2  | 163.2(3)   | C37  | C38  | C39  | 123(2)    |
| O1   | Te2  | C31  | 91.3(4)    | C38  | C39  | Se2  | 122.1(14) |
| O1   | Te2  | C43  | 88.8(3)    | C38  | C39  | C40  | 121.2(16) |
| O1   | Te2  | Se2A | 168.6(3)   | C40  | C39  | Se2  | 116.7(11) |
| C31  | Te2  | Se2  | 76.7(4)    | C35  | C40  | C31  | 120.3(15) |
| C31  | Te2  | C43  | 94.8(4)    | C35  | C40  | C39  | 112.1(13) |
| C31  | Te2  | Se2A | 83.6(4)    | C39  | C40  | C31  | 127.6(14) |
| C43  | Te2  | Se2  | 80.8(3)    | C42  | C41  | C34  | 103.8(17) |
| C43  | Te2  | Se2A | 81.6(4)    | C41  | C42  | C36  | 108.5(15) |
| C9   | Se1  | Te1  | 88.8(3)    | C44  | C43  | Te2  | 119.3(8)  |
| C9   | Se1  | C19  | 99.5(4)    | C48  | C43  | Te2  | 119.0(8)  |
| C19  | Se1  | Te1  | 98.0(3)    | C48  | C43  | C44  | 121.5(11) |
| C39  | Se2  | Te2  | 91.7(5)    | C45  | C44  | C43  | 118.9(11) |
| C39  | Se2  | C49A | 95.0(9)    | C44  | C45  | C46  | 119.7(11) |
| C49A | Se2  | Te2  | 99.5(6)    | C47  | C46  | C45  | 120.2(11) |
| Te1  | O1   | Te2  | 128.5(3)   | C46  | C47  | C48  | 119.7(11) |
| C2   | C1   | Te1  | 121.3(9)   | C43  | C48  | C47  | 119.9(11) |
| C2   | C1   | C10  | 117.3(10)  | C50A | C49  | Se2A | 111(3)    |
| C10  | C1   | Te1  | 121.4(8)   | C54A | C49  | Se2A | 123(3)    |
| C1   | C2   | C3   | 124.6(13)  | C54A | C49  | C50A | 127(4)    |
| C4   | C3   | C2   | 118.4(14)  | C51  | C50  | C49A | 120.4(18) |
| C3   | C4   | C5   | 120.0(12)  | C50  | C51  | C52  | 116.5(19) |
| C3   | C4   | C11  | 132.1(15)  | C53  | C52  | C51  | 122.8(17) |
| C5   | C4   | C11  | 107.7(13)  | C52  | C53  | C54  | 119.2(18) |
| C6   | C5   | C4   | 112.5(12)  | C49A | C54  | C53  | 119.3(17) |
| C10  | C5   | C4   | 122.2(11)  | F1   | B1   | F2   | 103.8(13) |
| C10  | C5   | C6   | 125.3(13)  | F3   | B1   | F1   | 109.4(14) |
| C5   | C6   | C12  | 108.7(13)  | F3   | B1   | F2   | 114.1(13) |
| C7   | C6   | C5   | 117.6(13)  | F4   | B1   | F1   | 114.8(13) |
| C7   | C6   | C12  | 133.6(13)  | F4   | B1   | F2   | 100.3(14) |
| C6   | C7   | C8   | 119.2(12)  | F4   | B1   | F3   | 113.8(14) |
| C7   | C8   | C9   | 121.1(13)  | F5   | B2   | F6   | 107.9(13) |
| C8   | C9   | Se1  | 117.7(9)   | F7   | B2   | F5   | 103.5(11) |
| C10  | C9   | Se1  | 120.3(9)   | F7   | B2   | F6   | 106.8(12) |
| C10  | C9   | C8   | 121.9(12)  | F8   | B2   | F5   | 112.2(12) |
| C5   | C10  | C1   | 117.2(10)  | F8   | B2   | F6   | 110.4(11) |
| C9   | C10  | C1   | 128.1(10)  | F8   | B2   | F7   | 115.6(14) |
| C9   | C10  | C5   | 114.7(11)  | C49  | Se2A | Te2  | 97.1(12)  |
| C4   | C11  | C12  | 104.6(13)  | C39A | Se2A | Te2  | 86.2(8)   |
| C6   | C12  | C11  | 106.4(12)  | C39A | Se2A | C49  | 102.8(15) |

**Table 5 Bond Angles for A22.**

| Atom | Atom | Atom | Angle/°   | Atom | Atom | Atom | Angle/°   |
|------|------|------|-----------|------|------|------|-----------|
| C14  | C13  | Te1  | 118.5(9)  | C51A | C50A | C49  | 118(3)    |
| C14  | C13  | C18  | 121.1(11) | C50A | C51A | C52A | 114(3)    |
| C18  | C13  | Te1  | 120.0(8)  | C53A | C52A | C51A | 125(2)    |
| C15  | C14  | C13  | 122.0(15) | C52A | C53A | C54A | 118(3)    |
| C16  | C15  | C14  | 119.1(13) | C49  | C54A | C53A | 118(3)    |
| C15  | C16  | C17  | 119.7(12) | C33  | C34A | C41A | 128.2(18) |
| C16  | C17  | C18  | 123.5(14) | C35A | C34A | C33  | 123.5(17) |
| C17  | C18  | C13  | 114.6(12) | C35A | C34A | C41A | 108.2(17) |
| C20  | C19  | Se1  | 120.4(8)  | C34A | C35A | C36A | 112.4(17) |
| C24  | C19  | Se1  | 117.1(8)  | C34A | C35A | C40A | 126.2(17) |
| C24  | C19  | C20  | 122.3(9)  | C40A | C35A | C36A | 121.3(18) |
| C19  | C20  | C21  | 118.1(10) | C35A | C36A | C42A | 105.7(18) |
| C22  | C21  | C20  | 120.5(10) | C37A | C36A | C35A | 114(2)    |
| C21  | C22  | C23  | 119.5(10) | C37A | C36A | C42A | 141(2)    |
| C24  | C23  | C22  | 119.9(11) | C38A | C37A | C36A | 127(2)    |
| C19  | C24  | C23  | 119.6(10) | C37A | C38A | C39A | 121(2)    |
| C32  | C31  | Te2  | 117.6(8)  | C38A | C39A | Se2A | 118.9(17) |
| C32  | C31  | C40  | 116.5(12) | C38A | C39A | C40A | 119.1(18) |
| C32  | C31  | C40A | 129.2(13) | C40A | C39A | Se2A | 121.9(15) |
| C40  | C31  | Te2  | 125.6(11) | C31  | C40A | C39A | 133.4(18) |
| C40A | C31  | Te2  | 113.1(11) | C35A | C40A | C31  | 109.1(16) |
| C33  | C32  | C31  | 120.1(12) | C35A | C40A | C39A | 117.6(16) |
| C32  | C33  | C34  | 123.5(14) | C42A | C41A | C34A | 106.9(18) |
| C32  | C33  | C34A | 111.8(14) | C41A | C42A | C36A | 106.7(16) |
| C33  | C34  | C41  | 132.1(17) | C50  | C49A | Se2  | 117.8(13) |
| C35  | C34  | C33  | 114.9(15) | C54  | C49A | Se2  | 120.8(14) |
| C35  | C34  | C41  | 113.0(17) | C54  | C49A | C50  | 121.4(17) |
| C34  | C35  | C36  | 109.2(16) |      |      |      |           |

**Table 6 Torsion Angles for A22.**

| A   | B    | C    | D    | Angle/°    | A   | B    | C    | D    | Angle/° |
|-----|------|------|------|------------|-----|------|------|------|---------|
| Te1 | C1   | C2   | C3   | 173.6(11)  | C33 | C34  | C41  | C42  | -179(2) |
| Te1 | C1   | C10  | C5   | -173.6(8)  | C33 | C34A | C35A | C36A | -179(3) |
| Te1 | C1   | C10  | C9   | 6.6(8)     | C33 | C34A | C35A | C40A | 1(6)    |
| Te1 | C13  | C14  | C15  | 172.2(10)  | C33 | C34A | C41A | C42A | 180(3)  |
| Te1 | C13  | C18  | C17  | -172.3(8)  | C34 | C35  | C36  | C37  | 178(2)  |
| Te2 | C31  | C32  | C33  | 174.5(5)   | C34 | C35  | C36  | C42  | -2(3)   |
| Te2 | C31  | C40  | C35  | -174.1(19) | C34 | C35  | C40  | C31  | 2(4)    |
| Te2 | C31  | C40  | C39  | 9(3)       | C34 | C35  | C40  | C39  | 180(3)  |
| Te2 | C31  | C40A | C35A | -175(2)    | C34 | C41  | C42  | C36  | -1(3)   |
| Te2 | C31  | C40A | C39A | 7(5)       | C35 | C34  | C41  | C42  | -1(3)   |
| Te2 | C43  | C44  | C45  | 177.1(9)   | C35 | C36  | C37  | C38  | 3(4)    |
| Te2 | C43  | C48  | C47  | -178.2(9)  | C35 | C36  | C42  | C41  | 2(3)    |
| Te2 | Se2A | C39A | C38A | 173(3)     | C36 | C35  | C40  | C31  | 178(2)  |
| Te2 | Se2A | C39A | C40A | -11(3)     | C36 | C35  | C40  | C39  | -4(4)   |

**Table 6 Torsion Angles for A22.**

| A   | B   | C   | D   | Angle/°    | A    | B    | C    | D    | Angle/°    |
|-----|-----|-----|-----|------------|------|------|------|------|------------|
| Se1 | C9  | C10 | C1  | 3.1(7)     | C36  | C37  | C38  | C39  | -3(4)      |
| Se1 | C9  | C10 | C5  | -176.6(7)  | C37  | C36  | C42  | C41  | -178(3)    |
| Se1 | C19 | C20 | C21 | 174.8(6)   | C37  | C38  | C39  | Se2  | 175.6(18)  |
| Se1 | C19 | C24 | C23 | -172.8(9)  | C37  | C38  | C39  | C40  | -1(4)      |
| Se2 | C39 | C40 | C31 | 5(4)       | C38  | C39  | C40  | C31  | -178(2)    |
| Se2 | C39 | C40 | C35 | -172.7(19) | C38  | C39  | C40  | C35  | 4(4)       |
| C1  | C2  | C3  | C4  | 4(2)       | C40  | C31  | C32  | C33  | 0.1(14)    |
| C2  | C1  | C10 | C5  | 6.0(11)    | C40  | C35  | C36  | C37  | 1(4)       |
| C2  | C1  | C10 | C9  | -173.8(9)  | C40  | C35  | C36  | C42  | -179(3)    |
| C2  | C3  | C4  | C5  | -2(2)      | C41  | C34  | C35  | C36  | 2(3)       |
| C2  | C3  | C4  | C11 | -176.3(16) | C41  | C34  | C35  | C40  | 178(3)     |
| C3  | C4  | C5  | C6  | -179.2(14) | C42  | C36  | C37  | C38  | -178(3)    |
| C3  | C4  | C5  | C10 | 3(2)       | C43  | C44  | C45  | C46  | 0.1(19)    |
| C3  | C4  | C11 | C12 | 176.9(18)  | C44  | C43  | C48  | C47  | -3.0(17)   |
| C4  | C5  | C6  | C7  | -178.9(12) | C44  | C45  | C46  | C47  | -1.0(19)   |
| C4  | C5  | C6  | C12 | 3.7(16)    | C45  | C46  | C47  | C48  | 0.0(18)    |
| C4  | C5  | C10 | C1  | -4.6(15)   | C46  | C47  | C48  | C43  | 2.0(18)    |
| C4  | C5  | C10 | C9  | 175.2(10)  | C48  | C43  | C44  | C45  | 1.9(17)    |
| C4  | C11 | C12 | C6  | -0.3(18)   | C49  | Se2A | C39A | C38A | -91(3)     |
| C5  | C4  | C11 | C12 | 2.4(17)    | C49  | Se2A | C39A | C40A | 86(3)      |
| C5  | C6  | C7  | C8  | 3.3(18)    | C49  | C50A | C51A | C52A | -8(4)      |
| C5  | C6  | C12 | C11 | -1.9(17)   | C50  | C51  | C52  | C53  | 9(3)       |
| C6  | C5  | C10 | C1  | 177.7(10)  | C51  | C50  | C49A | Se2  | -179.3(15) |
| C6  | C5  | C10 | C9  | -2.5(14)   | C51  | C50  | C49A | C54  | 1(2)       |
| C6  | C7  | C8  | C9  | -2.2(18)   | C51  | C52  | C53  | C54  | -7(3)      |
| C7  | C6  | C12 | C11 | -178.8(15) | C52  | C53  | C54  | C49A | 2.7(16)    |
| C7  | C8  | C9  | Se1 | 178.8(9)   | C53  | C54  | C49A | Se2  | -179.2(12) |
| C7  | C8  | C9  | C10 | -1.6(15)   | C53  | C54  | C49A | C50  | 0.3(15)    |
| C8  | C9  | C10 | C1  | -176.5(9)  | Se2A | C49  | C50A | C51A | -176(2)    |
| C8  | C9  | C10 | C5  | 3.7(11)    | Se2A | C49  | C54A | C53A | 177(2)     |
| C10 | C1  | C2  | C3  | -6.1(18)   | Se2A | C39A | C40A | C31  | 6(6)       |
| C10 | C5  | C6  | C7  | -1.0(18)   | Se2A | C39A | C40A | C35A | -172(3)    |
| C10 | C5  | C6  | C12 | -178.4(12) | C50A | C49  | C54A | C53A | -2(2)      |
| C11 | C4  | C5  | C6  | -3.9(17)   | C50A | C51A | C52A | C53A | 14(5)      |
| C11 | C4  | C5  | C10 | 178.2(11)  | C51A | C52A | C53A | C54A | -14(5)     |
| C12 | C6  | C7  | C8  | 179.9(15)  | C52A | C53A | C54A | C49  | 7(4)       |
| C13 | C14 | C15 | C16 | -0.6(18)   | C54A | C49  | C50A | C51A | 3(2)       |
| C14 | C13 | C18 | C17 | -0.3(12)   | C34A | C35A | C36A | C37A | -180(3)    |
| C14 | C15 | C16 | C17 | 1(2)       | C34A | C35A | C36A | C42A | 1(4)       |
| C15 | C16 | C17 | C18 | -2(2)      | C34A | C35A | C40A | C31  | -1(5)      |
| C16 | C17 | C18 | C13 | 1.1(17)    | C34A | C35A | C40A | C39A | 177(4)     |
| C18 | C13 | C14 | C15 | 0.1(14)    | C34A | C41A | C42A | C36A | -3(4)      |
| C19 | C20 | C21 | C22 | -0.5(11)   | C35A | C34A | C41A | C42A | 4(4)       |
| C20 | C19 | C24 | C23 | 2.5(16)    | C35A | C36A | C37A | C38A | 2(5)       |
| C20 | C21 | C22 | C23 | -0.9(12)   | C35A | C36A | C42A | C41A | 1(3)       |
| C21 | C22 | C23 | C24 | 3.1(16)    | C36A | C35A | C40A | C31  | 179(3)     |

**Table 6 Torsion Angles for A22.**

| A   | B   | C    | D    | Angle/°  | A    | B    | C    | D    | Angle/° |
|-----|-----|------|------|----------|------|------|------|------|---------|
| C22 | C23 | C24  | C19  | -3.9(17) | C36A | C35A | C40A | C39A | -2(5)   |
| C24 | C19 | C20  | C21  | -0.3(14) | C36A | C37A | C38A | C39A | 0(5)    |
| C31 | C32 | C33  | C34  | -1.7(14) | C37A | C36A | C42A | C41A | -177(4) |
| C31 | C32 | C33  | C34A | 0.9(18)  | C37A | C38A | C39A | Se2A | 173(3)  |
| C32 | C31 | C40  | C35  | 0(3)     | C37A | C38A | C39A | C40A | -3(5)   |
| C32 | C31 | C40  | C39  | -178(2)  | C38A | C39A | C40A | C31  | -178(3) |
| C32 | C31 | C40A | C35A | 2(4)     | C38A | C39A | C40A | C35A | 4(5)    |
| C32 | C31 | C40A | C39A | -177(3)  | C40A | C31  | C32  | C33  | -2(2)   |
| C32 | C33 | C34  | C35  | 3(3)     | C40A | C35A | C36A | C37A | 0(5)    |
| C32 | C33 | C34  | C41  | -179(2)  | C40A | C35A | C36A | C42A | -179(3) |
| C32 | C33 | C34A | C35A | -1(4)    | C41A | C34A | C35A | C36A | -3(4)   |
| C32 | C33 | C34A | C41A | -176(3)  | C41A | C34A | C35A | C40A | 177(3)  |
| C33 | C34 | C35  | C36  | -180(2)  | C42A | C36A | C37A | C38A | 180(4)  |
| C33 | C34 | C35  | C40  | -3(4)    | C49A | C50  | C51  | C52  | -5(3)   |

**Table 7 Hydrogen Atom Coordinates ( $\text{\AA} \times 10^4$ ) and Isotropic Displacement Parameters ( $\text{\AA}^2 \times 10^3$ ) for A22.**

| Atom | x        | y        | z        | U(eq) |
|------|----------|----------|----------|-------|
| H2   | 2683.53  | 2022.22  | 8424.06  | 91    |
| H3   | 4087.36  | 1287.18  | 8845.11  | 117   |
| H7   | 774.7    | -1209.46 | 8647.59  | 99    |
| H8   | -679.69  | -543.45  | 8195.36  | 94    |
| H11A | 4108.02  | -37.96   | 9495.99  | 128   |
| H11B | 4453.21  | -198.91  | 8786.83  | 128   |
| H12A | 3274.67  | -1080.46 | 8714.32  | 128   |
| H12B | 2935.73  | -922.61  | 9424.13  | 128   |
| H14  | 761.41   | 1844.81  | 9510.88  | 97    |
| H15  | 1.4      | 1904.97  | 10471.93 | 101   |
| H16  | -1851.4  | 2157.86  | 10484.65 | 103   |
| H17  | -2941.06 | 2298.51  | 9535.34  | 102   |
| H18  | -2211.13 | 2250.78  | 8534.92  | 84    |
| H20  | -180.86  | -183.92  | 6999.61  | 64    |
| H21  | -44.84   | -298.12  | 5885.85  | 69    |
| H22  | -631.96  | 572.82   | 5188.03  | 70    |
| H23  | -1419.66 | 1542.23  | 5592.96  | 85    |
| H24  | -1443.41 | 1677.24  | 6700.27  | 72    |
| H32  | 447.01   | 3298     | 9414.52  | 78    |
| H33  | 325.03   | 3659.36  | 10454.51 | 87    |
| H33A | 368.29   | 3684.33  | 10491.84 | 87    |
| H37  | 3037.02  | 6305.82  | 10096.23 | 79    |
| H38  | 3126.82  | 6104.11  | 9073.45  | 78    |
| H41A | 499.87   | 4952.36  | 11207.16 | 98    |
| H41B | 1656.3   | 4573.2   | 11405.47 | 98    |
| H42A | 2521.87  | 5496.03  | 11302    | 103   |
| H42B | 1371.36  | 5871.46  | 11095.54 | 103   |
| H44  | 3172.87  | 3319.08  | 9354.44  | 74    |

**Table 7 Hydrogen Atom Coordinates ( $\text{\AA}\times 10^4$ ) and Isotropic Displacement Parameters ( $\text{\AA}^2\times 10^3$ ) for A22.**

| Atom | x        | y       | z        | U(eq) |
|------|----------|---------|----------|-------|
| H45  | 5044.52  | 3050.5  | 9545.55  | 86    |
| H46  | 6174.61  | 3078.45 | 8704.8   | 78    |
| H47  | 5431.41  | 3346.4  | 7678.41  | 81    |
| H48  | 3536.38  | 3583.66 | 7488.89  | 72    |
| H50  | 1529.6   | 6461.6  | 8270.77  | 62    |
| H51  | -145.13  | 7057.16 | 8047.35  | 84    |
| H52  | -1573.88 | 6517.83 | 7357.52  | 82    |
| H53  | -1526.96 | 5381.16 | 7161.1   | 70    |
| H54  | 138.61   | 4778.92 | 7428.27  | 55    |
| H50A | 1518.87  | 6336.77 | 7948.47  | 106   |
| H51A | -199.04  | 6920.48 | 7682.77  | 114   |
| H52A | -1506.3  | 6309.66 | 6956.79  | 118   |
| H53A | -1487.02 | 5149.74 | 6918.81  | 112   |
| H54A | 248.63   | 4600.4  | 7214.88  | 112   |
| H37A | 3047.52  | 6340.71 | 9791.56  | 79    |
| H38A | 3157.22  | 6056.58 | 8791.12  | 82    |
| H41C | 703.4    | 5091.57 | 11089.21 | 87    |
| H41D | 1878.64  | 4725.06 | 11249.81 | 87    |
| H42C | 2694.08  | 5649.07 | 11063.13 | 81    |
| H42D | 1520.39  | 6003.15 | 10863    | 81    |

**Table 8 Atomic Occupancy for A22.**

| Atom | Occupancy | Atom | Occupancy | Atom | Occupancy |
|------|-----------|------|-----------|------|-----------|
| Se2  | 0.57(2)   | H33  | 0.57(2)   | H33A | 0.43(2)   |
| C34  | 0.57(2)   | C35  | 0.57(2)   | C36  | 0.57(2)   |
| C37  | 0.57(2)   | H37  | 0.57(2)   | C38  | 0.57(2)   |
| H38  | 0.57(2)   | C39  | 0.57(2)   | C40  | 0.57(2)   |
| C41  | 0.57(2)   | H41A | 0.57(2)   | H41B | 0.57(2)   |
| C42  | 0.57(2)   | H42A | 0.57(2)   | H42B | 0.57(2)   |
| C49  | 0.43(2)   | C50  | 0.57(2)   | H50  | 0.57(2)   |
| C51  | 0.57(2)   | H51  | 0.57(2)   | C52  | 0.57(2)   |
| H52  | 0.57(2)   | C53  | 0.57(2)   | H53  | 0.57(2)   |
| C54  | 0.57(2)   | H54  | 0.57(2)   | Se2A | 0.43(2)   |
| C50A | 0.43(2)   | H50A | 0.43(2)   | C51A | 0.43(2)   |
| H51A | 0.43(2)   | C52A | 0.43(2)   | H52A | 0.43(2)   |
| C53A | 0.43(2)   | H53A | 0.43(2)   | C54A | 0.43(2)   |
| H54A | 0.43(2)   | C34A | 0.43(2)   | C35A | 0.43(2)   |
| C36A | 0.43(2)   | C37A | 0.43(2)   | H37A | 0.43(2)   |
| C38A | 0.43(2)   | H38A | 0.43(2)   | C39A | 0.43(2)   |
| C40A | 0.43(2)   | C41A | 0.43(2)   | H41C | 0.43(2)   |
| H41D | 0.43(2)   | C42A | 0.43(2)   | H42C | 0.43(2)   |
| H42D | 0.43(2)   | C49A | 0.57(2)   |      |           |

**Table 9 Solvent masks information for A22.**

| Number | X      | Y     | Z     | Volume | Electron count | Content                             |
|--------|--------|-------|-------|--------|----------------|-------------------------------------|
| 1      | -0.951 | 0.000 | 0.000 | 444.6  | 142.1          | 3.4 CH <sub>2</sub> Cl <sub>2</sub> |
| 2      | -0.757 | 0.500 | 0.500 | 444.6  | 142.1          | 3.4 CH <sub>2</sub> Cl <sub>2</sub> |

**X-ray Crystallographic Structure determination on [N23]BF<sub>4</sub>**Data Collection

A red needle crystal of C<sub>10</sub>H<sub>6</sub>BF<sub>4</sub>S<sub>2</sub> having approximate dimensions of 0.200 x 0.060 x 0.010 mm was mounted in a loop. All measurements were made on a Rigaku Saturn724 diffractometer using multi-layer mirror monochromated Mo-K $\alpha$  radiation.

Cell constants and an orientation matrix for data collection corresponded to a primitive orthorhombic cell with dimensions:

$$\begin{aligned} a &= 10.11690 \text{ \AA} \\ b &= 6.60720 \text{ \AA} \\ c &= 46.90380 \text{ \AA} \\ V &= 3135.25551 \text{ \AA}^3 \end{aligned}$$

For Z = 12 and F.W. = 277.08, the calculated density is 1.761 g/cm<sup>3</sup>. Based on the reflection conditions of:

$$h0l: h+l = 2n$$

packing considerations, a statistical analysis of intensity distribution, and the successful solution and refinement of the structure, the space group was determined to be:

$$\text{Pmn}21 \text{ (\#31)}$$

The data were collected at a temperature of -179  $\pm$  1oC to a maximum 2 $\theta$  value of 54.2o.

Data Reduction

Of the 16907 reflections were collected, where 5414 were unique (Rint = 0.0623); equivalent reflections were merged. Data were collected and processed using CrystalClear (Rigaku). 1

The linear absorption coefficient,  $\mu$ , for Mo-K $\alpha$  radiation is 5.337 cm<sup>-1</sup>. The data were corrected for Lorentz and polarization effects.

Structure Solution and Refinement

The structure was solved by direct methods<sup>2</sup> and expanded using Fourier techniques. The non-hydrogen atoms were refined anisotropically. Hydrogen atoms were refined using the riding model. The final cycle of full-matrix least-squares refinement<sup>3</sup> on F<sup>2</sup> was based on 5413 observed reflections and 507 variable parameters and converged (largest parameter shift was 0.03 times its esd) with unweighted and weighted agreement factors of:

$$R1 = \sum ||F_o| - |F_c|| / \sum |F_o| = 0.0697$$

$$wR2 = [ \sum ( w (F_o^2 - F_c^2)^2 ) / \sum w(F_o^2)^2 ]^{1/2} = 0.1738$$

The goodness of fit<sup>4</sup> was 1.15. Unit weights were used. The maximum and minimum peaks on the final difference Fourier map corresponded to 0.86 and -0.62 e-/ $\text{\AA}^3$ , respectively. The final Flack parameter<sup>5</sup> was 0.60(17).

Neutral atom scattering factors were taken from International Tables for Crystallography (IT), Vol. C, Table 6.1.1.4 6. Anomalous dispersion effects were included in Fcalc<sup>7</sup>; the values for Df' and Df'' were those of Creagh and McAuley<sup>8</sup>. The values for the mass attenuation coefficients are those of Creagh and Hubbell<sup>9</sup>. All calculations were performed using the CrystalStructure<sup>10</sup> crystallographic software package except for refinement, which was performed using SHELXL Version 2018/311.

Further refinement was undertaken with SHELXL within the Olex2 v. 1.5 suite.<sup>11</sup>



**Table 1 Crystal data and structure refinement for [N23]BF<sub>4</sub>.**

|                                             |                                                               |
|---------------------------------------------|---------------------------------------------------------------|
| Identification code                         | [N23]BF <sub>4</sub>                                          |
| Empirical formula                           | C <sub>10</sub> H <sub>6</sub> BF <sub>4</sub> S <sub>2</sub> |
| Formula weight                              | 277.08                                                        |
| Temperature/K                               | 93.25                                                         |
| Crystal system                              | orthorhombic                                                  |
| Space group                                 | Pmn2 <sub>1</sub>                                             |
| a/Å                                         | 10.1169(9)                                                    |
| b/Å                                         | 6.6072(6)                                                     |
| c/Å                                         | 46.904(4)                                                     |
| α/°                                         | 90                                                            |
| β/°                                         | 90                                                            |
| γ/°                                         | 90                                                            |
| Volume/Å <sup>3</sup>                       | 3135.3(5)                                                     |
| Z                                           | 12                                                            |
| ρ <sub>calc</sub> /g/cm <sup>3</sup>        | 1.761                                                         |
| μ/mm <sup>-1</sup>                          | 0.534                                                         |
| F(000)                                      | 1668.0                                                        |
| Crystal size/mm <sup>3</sup>                | 0.2 × 0.06 × 0.01                                             |
| Radiation                                   | MoKα (λ = 0.71069)                                            |
| 2θ range for data collection/°              | 6.226 to 54.178                                               |
| Index ranges                                | -8 ≤ h ≤ 12, -8 ≤ k ≤ 5, -57 ≤ l ≤ 60                         |
| Reflections collected                       | 16895                                                         |
| Independent reflections                     | 5411 [R <sub>int</sub> = 0.0612, R <sub>sigma</sub> = 0.0381] |
| Data/restraints/parameters                  | 5411/607/506                                                  |
| Goodness-of-fit on F <sup>2</sup>           | 1.151                                                         |
| Final R indexes [I ≥ 2σ (I)]                | R <sub>1</sub> = 0.0698, wR <sub>2</sub> = 0.1561             |
| Final R indexes [all data]                  | R <sub>1</sub> = 0.0779, wR <sub>2</sub> = 0.1614             |
| Largest diff. peak/hole / e Å <sup>-3</sup> | 0.77/-0.67                                                    |
| Flack parameter                             | 0.4(2)                                                        |

**Table 2 Fractional Atomic Coordinates (×10<sup>4</sup>) and Equivalent Isotropic Displacement Parameters (Å<sup>2</sup>×10<sup>3</sup>) for [N23]BF<sub>4</sub>. U<sub>eq</sub> is defined as 1/3 of the trace of the orthogonalised U<sub>ij</sub> tensor.**

| Atom | x         | y         | z          | U(eq)   |
|------|-----------|-----------|------------|---------|
| S1   | -1012(3)  | -4669(4)  | -3644.6(6) | 18.7(6) |
| C1   | -1172(12) | -4869(16) | -4013(2)   | 17(2)   |
| C2   | 0         | -4900(20) | -4167(3)   | 16(3)   |
| C3   | 0         | -5060(20) | -4465(3)   | 15(3)   |
| C4   | -1243(12) | -5162(18) | -4602(2)   | 26(3)   |
| C5   | -2412(13) | -5039(18) | -4450(3)   | 24(2)   |
| C6   | -2412(13) | -4900(16) | -4151(2)   | 19(2)   |
| S2   | -1009(3)  | -9942(4)  | -4529.3(5) | 17.0(6) |
| C7   | -1224(13) | -9729(17) | -4166(2)   | 18(2)   |
| C8   | 0         | -9670(20) | -4013(3)   | 18(3)   |
| C9   | 0         | -9470(20) | -3704(3)   | 16(3)   |

**Table 2 Fractional Atomic Coordinates ( $\times 10^4$ ) and Equivalent Isotropic Displacement Parameters ( $\text{\AA}^2 \times 10^3$ ) for [N23]BF<sub>4</sub>. U<sub>eq</sub> is defined as 1/3 of the trace of the orthogonalised U<sub>ij</sub> tensor.**

| Atom | x         | y         | z           | U(eq)    |
|------|-----------|-----------|-------------|----------|
| C10  | -1244(11) | -9377(17) | -3562(2)    | 17(2)    |
| C11  | -2412(11) | -9452(15) | -3726(2)    | 17(2)    |
| C12  | -2404(13) | -9644(16) | -4020(2)    | 20(2)    |
| S3   | -3984(3)  | -2969(4)  | -5346.3(5)  | 15.6(6)  |
| C13  | -3820(10) | -3340(15) | -5709(2)    | 11.5(19) |
| C14  | -5000     | -3490(20) | -5861(3)    | 12(3)    |
| C15  | -5000     | -3840(20) | -6162(3)    | 15(3)    |
| C16  | -3755(12) | -4094(17) | -6296(2)    | 19(2)    |
| C17  | -2604(12) | -3854(17) | -6148(2)    | 20(2)    |
| C18  | -2577(11) | -3535(16) | -5845(2)    | 14(2)    |
| S4   | -3987(3)  | -8649(4)  | -6161.0(5)  | 11.7(5)  |
| C19  | -3810(10) | -8286(16) | -5799(2)    | 12.5(19) |
| C20  | -5000     | -8120(20) | -5645(3)    | 12(3)    |
| C21  | -5000     | -7780(20) | -5351(3)    | 14(3)    |
| C22  | -3769(12) | -7600(17) | -5214(2)    | 19(2)    |
| C23  | -2594(11) | -7798(16) | -5366(2)    | 18(2)    |
| C24  | -2583(11) | -8126(15) | -5658(2)    | 12.9(19) |
| S5   | -1008(3)  | -2653(4)  | -7821.1(5)  | 14.4(5)  |
| C25  | -1204(11) | -2281(17) | -7456(2)    | 19(2)    |
| C26  | 0         | -2090(30) | -7300(3)    | 20(3)    |
| C27  | 0         | -1690(20) | -7006(4)    | 19(3)    |
| C28  | -1257(12) | -1489(17) | -6870(2)    | 19(2)    |
| C29  | -2425(12) | -1702(15) | -7028(2)    | 17(2)    |
| C30  | -2418(12) | -2060(17) | -7314(2)    | 20(2)    |
| S6   | -1009(3)  | -6908(4)  | -7015.3(5)  | 15.6(5)  |
| C31  | -1194(11) | -7362(16) | -7378(2)    | 15(2)    |
| C32  | 0         | -7510(20) | -7524(3)    | 13(3)    |
| C33  | 0         | -7850(20) | -7830(3)    | 15(3)    |
| C34  | -1245(11) | -8018(16) | -7966(2)    | 17(2)    |
| C35  | -2414(11) | -7810(15) | -7813(2)    | 16(2)    |
| C36  | -2427(11) | -7497(16) | -7516(2)    | 16(2)    |
| B1   | 0         | -1870(30) | -5283(4)    | 22(3)    |
| F1   | 0         | -1109(14) | -5559.7(19) | 22(2)    |
| F2   | -1131(7)  | -3016(10) | -5241.6(14) | 24.7(16) |
| F3   | 0         | -171(16)  | -5095(2)    | 29(2)    |
| B2   | -5000     | -1250(30) | -4583(4)    | 20(3)    |
| F4   | -5000     | -2022(15) | -4300.9(19) | 21(2)    |
| F5   | -3866(8)  | -53(11)   | -4625.2(17) | 34(2)    |
| F6   | -5000     | -2864(15) | -4778(2)    | 25(2)    |
| B3   | 0         | -7560(30) | -6246(4)    | 18(3)    |
| F7   | 0         | -6594(12) | -5983(2)    | 17(2)    |
| F8   | -1144(7)  | -8755(11) | -6270.4(16) | 29.0(17) |
| F9   | 0         | -6071(17) | -6468.2(19) | 27(2)    |
| B4   | -5000     | -8020(30) | -6928(4)    | 23(3)    |
| F10  | -5000     | -9447(16) | -6710(2)    | 30(2)    |

**Table 2 Fractional Atomic Coordinates ( $\times 10^4$ ) and Equivalent Isotropic Displacement Parameters ( $\text{\AA}^2 \times 10^3$ ) for [N23]BF<sub>4</sub>.  $U_{\text{eq}}$  is defined as 1/3 of the trace of the orthogonalised  $U_{ij}$  tensor.**

| Atom | x        | y         | z           | U(eq)    |
|------|----------|-----------|-------------|----------|
| F11  | -3893(8) | -6795(12) | -6899.2(16) | 32.3(18) |
| F12  | -5000    | -9037(15) | -7187.6(19) | 22(2)    |
| B5   | 0        | -4240(30) | -8577(4)    | 25(4)    |
| F13  | 0        | -3352(15) | -8845(2)    | 26(2)    |
| F14  | 0        | -2637(19) | -8377(2)    | 41(3)    |
| F15  | -1118(8) | -5394(12) | -8545.4(16) | 33.3(19) |
| B6   | -5000    | -3780(30) | -7884(4)    | 21(3)    |
| F16  | -5000    | -4556(15) | -7609(2)    | 26(2)    |
| F17  | -3870(8) | -2593(11) | -7929.5(15) | 32.1(18) |
| F18  | -5000    | -5394(15) | -8080(2)    | 29(2)    |

**Table 3 Anisotropic Displacement Parameters ( $\text{\AA}^2 \times 10^3$ ) for [N23]BF<sub>4</sub>. The Anisotropic displacement factor exponent takes the form:  $-2\pi^2[h^2a^2U_{11}+2hka*b*U_{12}+\dots]$ .**

| Atom | $U_{11}$ | $U_{22}$ | $U_{33}$ | $U_{23}$ | $U_{13}$ | $U_{12}$ |
|------|----------|----------|----------|----------|----------|----------|
| S1   | 14.3(13) | 20.3(14) | 21.5(14) | -0.8(10) | 1.0(13)  | 0.5(11)  |
| C1   | 17(2)    | 16(2)    | 17(2)    | 0.1(13)  | -0.4(13) | -0.1(14) |
| C2   | 16(3)    | 15(3)    | 16(3)    | 0.0(14)  | 0        | 0        |
| C3   | 15(3)    | 14(4)    | 16(3)    | 1(2)     | 0        | 0        |
| C4   | 24(3)    | 27(4)    | 26(3)    | 1(2)     | -2(2)    | -2(2)    |
| C5   | 23(3)    | 24(3)    | 24(3)    | 1(2)     | -2(2)    | -1(3)    |
| C6   | 18(2)    | 18(3)    | 20(2)    | 0.1(14)  | -0.3(13) | 0.5(14)  |
| S2   | 11.3(13) | 21.7(15) | 18.1(13) | -2.2(10) | -1.7(13) | 0.9(11)  |
| C7   | 18(2)    | 17(3)    | 18(2)    | 0.2(13)  | 0.3(13)  | 0.0(14)  |
| C8   | 18(3)    | 18(3)    | 18(3)    | -0.3(14) | 0        | 0        |
| C9   | 16(3)    | 16(3)    | 16(3)    | 0.0(14)  | 0        | 0        |
| C10  | 17(2)    | 17(2)    | 17(2)    | 0.7(14)  | 1.7(13)  | 0.7(14)  |
| C11  | 16(3)    | 16(3)    | 19(3)    | 0(2)     | 4(2)     | 1(2)     |
| C12  | 18(3)    | 20(3)    | 22(3)    | -1(2)    | 1(2)     | -1(2)    |
| S3   | 9.6(12)  | 19.1(16) | 18.2(12) | -2.8(10) | 0.0(12)  | -0.6(10) |
| C13  | 12(2)    | 11(2)    | 12(2)    | -0.3(13) | -0.3(13) | -0.5(13) |
| C14  | 12(3)    | 12(3)    | 12(3)    | 0.0(14)  | 0        | 0        |
| C15  | 16(3)    | 15(4)    | 14(3)    | 1(3)     | 0        | 0        |
| C16  | 19(3)    | 19(3)    | 18(3)    | 0(2)     | 1(2)     | 2(2)     |
| C17  | 20(3)    | 20(3)    | 21(3)    | 0(2)     | 2(2)     | 0(2)     |
| C18  | 13(2)    | 13(2)    | 14(2)    | 0.5(13)  | 0.6(13)  | 0.1(14)  |
| S4   | 9.1(10)  | 12.8(12) | 13.3(10) | -1.7(8)  | 0.1(10)  | 2.4(10)  |
| C19  | 13(2)    | 12(2)    | 13(2)    | 0.2(13)  | 0.0(13)  | -0.4(13) |
| C20  | 12(3)    | 12(3)    | 13(3)    | 0.1(14)  | 0        | 0        |
| C21  | 14(3)    | 14(3)    | 15(3)    | 0.1(14)  | 0        | 0        |
| C22  | 20(3)    | 19(3)    | 19(3)    | 0(2)     | -1(2)    | 0(2)     |
| C23  | 17(3)    | 19(3)    | 20(3)    | -1(2)    | -2(2)    | 0(2)     |
| C24  | 11(3)    | 11(3)    | 17(3)    | -1(2)    | 0(2)     | 1(2)     |
| S5   | 13.7(12) | 12.7(14) | 16.7(12) | -1.8(10) | -1.3(12) | 0.2(10)  |
| C25  | 20(3)    | 19(3)    | 18(3)    | 0(2)     | 1(2)     | -2(2)    |

**Table 3 Anisotropic Displacement Parameters ( $\text{\AA}^2 \times 10^3$ ) for [N23]BF<sub>4</sub>. The Anisotropic displacement factor exponent takes the form:  $-2\pi^2[h^2a^*U_{11}+2hka^*b^*U_{12}+\dots]$ .**

| Atom | U <sub>11</sub> | U <sub>22</sub> | U <sub>33</sub> | U <sub>23</sub> | U <sub>13</sub> | U <sub>12</sub> |
|------|-----------------|-----------------|-----------------|-----------------|-----------------|-----------------|
| C26  | 20(4)           | 20(4)           | 21(4)           | 1(3)            | 0               | 0               |
| C27  | 19(4)           | 17(4)           | 19(3)           | 2(3)            | 0               | 0               |
| C28  | 20(3)           | 18(3)           | 20(3)           | -2(2)           | 0(2)            | 2(2)            |
| C29  | 17(2)           | 16(2)           | 17(2)           | 0.9(14)         | 0.8(13)         | 0.6(14)         |
| C30  | 19(3)           | 20(3)           | 21(3)           | 2(2)            | -1(2)           | 0(2)            |
| S6   | 12.9(12)        | 14.9(14)        | 19.0(12)        | -0.4(10)        | 0.3(12)         | 0.3(10)         |
| C31  | 15(3)           | 14(3)           | 15(3)           | 1(2)            | 1(2)            | -1(2)           |
| C32  | 13(3)           | 13(4)           | 14(3)           | -1(3)           | 0               | 0               |
| C33  | 15(3)           | 14(3)           | 15(3)           | 0.1(14)         | 0               | 0               |
| C34  | 17(3)           | 15(3)           | 17(3)           | 0(2)            | -2(2)           | 0(2)            |
| C35  | 15(3)           | 15(3)           | 17(3)           | 0(2)            | -3(2)           | -2(2)           |
| C36  | 15(3)           | 15(3)           | 19(3)           | -2(2)           | 0(2)            | 2(2)            |
| B1   | 21(4)           | 22(4)           | 22(4)           | -0.4(14)        | 0               | 0               |
| F1   | 17(5)           | 28(5)           | 21(4)           | -6(4)           | 0               | 0               |
| F2   | 17(4)           | 32(4)           | 25(3)           | 5(3)            | -1(3)           | -10(3)          |
| F3   | 21(6)           | 37(6)           | 29(5)           | -7(4)           | 0               | 0               |
| B2   | 13(7)           | 30(9)           | 18(6)           | 6(5)            | 0               | 0               |
| F4   | 18(5)           | 34(6)           | 10(4)           | -1(3)           | 0               | 0               |
| F5   | 20(4)           | 42(5)           | 40(5)           | 10(3)           | 3(4)            | -7(3)           |
| F6   | 24(6)           | 35(6)           | 16(4)           | 7(4)            | 0               | 0               |
| B3   | 17(4)           | 19(4)           | 18(4)           | -2(2)           | 0               | 0               |
| F7   | 19(5)           | 12(4)           | 21(4)           | -5(3)           | 0               | 0               |
| F8   | 17(4)           | 37(4)           | 33(4)           | -9(3)           | -4(3)           | -9(3)           |
| F9   | 22(5)           | 46(6)           | 14(4)           | 2(4)            | 0               | 0               |
| B4   | 15(6)           | 31(6)           | 21(5)           | -6(4)           | 0               | 0               |
| F10  | 31(6)           | 36(6)           | 24(5)           | -7(4)           | 0               | 0               |
| F11  | 19(4)           | 50(5)           | 28(4)           | -11(3)          | 2(3)            | -11(3)          |
| F12  | 11(4)           | 40(6)           | 14(4)           | -4(4)           | 0               | 0               |
| B5   | 25(4)           | 25(4)           | 25(4)           | 0.3(14)         | 0               | 0               |
| F13  | 18(5)           | 37(6)           | 24(5)           | 9(4)            | 0               | 0               |
| F14  | 31(7)           | 65(7)           | 26(5)           | -8(5)           | 0               | 0               |
| F15  | 23(4)           | 52(5)           | 26(4)           | 15(3)           | -2(3)           | -6(3)           |
| B6   | 13(7)           | 34(9)           | 18(6)           | 1(6)            | 0               | 0               |
| F16  | 23(5)           | 34(6)           | 21(4)           | 5(4)            | 0               | 0               |
| F17  | 28(4)           | 36(4)           | 32(4)           | 1(3)            | 2(3)            | -16(3)          |
| F18  | 29(6)           | 38(6)           | 20(5)           | -2(4)           | 0               | 0               |

**Table 4 Bond Lengths for [N23]BF<sub>4</sub>.**

| Atom | Atom            | Length/ $\text{\AA}$ | Atom | Atom            | Length/ $\text{\AA}$ |
|------|-----------------|----------------------|------|-----------------|----------------------|
| S1   | S1 <sup>1</sup> | 2.048(6)             | S5   | S5 <sup>1</sup> | 2.039(6)             |
| S1   | C1              | 1.741(11)            | S5   | C25             | 1.739(11)            |
| C1   | C2              | 1.388(14)            | C25  | C26             | 1.428(14)            |
| C1   | C6              | 1.411(16)            | C25  | C30             | 1.405(16)            |
| C2   | C3              | 1.40(2)              | C26  | C27             | 1.40(2)              |

**Table 4 Bond Lengths for [N23]BF<sub>4</sub>.**

| Atom | Atom             | Length/Å  | Atom | Atom             | Length/Å  |
|------|------------------|-----------|------|------------------|-----------|
| C3   | C4 <sup>1</sup>  | 1.412(14) | C27  | C28 <sup>1</sup> | 1.429(14) |
| C3   | C4               | 1.412(14) | C27  | C28              | 1.429(14) |
| C4   | H4               | 0.9500    | C28  | H28              | 0.9500    |
| C4   | C5               | 1.383(17) | C28  | C29              | 1.402(16) |
| C5   | H5               | 0.9500    | C29  | H29              | 0.9500    |
| C5   | C6               | 1.406(16) | C29  | C30              | 1.363(15) |
| C6   | H6               | 0.9500    | C30  | H30              | 0.9500    |
| S2   | S2 <sup>1</sup>  | 2.042(6)  | S6   | S6 <sup>1</sup>  | 2.041(6)  |
| S2   | C7               | 1.722(12) | S6   | C31              | 1.738(10) |
| C7   | C8               | 1.432(15) | C31  | C32              | 1.392(13) |
| C7   | C12              | 1.378(17) | C31  | C36              | 1.408(15) |
| C8   | C9               | 1.46(2)   | C32  | C33              | 1.45(2)   |
| C9   | C10              | 1.425(13) | C33  | C34              | 1.416(13) |
| C9   | C10 <sup>1</sup> | 1.425(13) | C33  | C34 <sup>1</sup> | 1.416(13) |
| C10  | H10              | 0.9500    | C34  | H34              | 0.9500    |
| C10  | C11              | 1.412(16) | C34  | C35              | 1.389(16) |
| C11  | H11              | 0.9500    | C35  | H35              | 0.9500    |
| C11  | C12              | 1.383(15) | C35  | C36              | 1.409(15) |
| C12  | H12              | 0.9500    | C36  | H36              | 0.9500    |
| S3   | S3 <sup>2</sup>  | 2.055(6)  | B1   | F1               | 1.39(2)   |
| S3   | C13              | 1.729(10) | B1   | F2               | 1.387(13) |
| C13  | C14              | 1.393(12) | B1   | F2 <sup>1</sup>  | 1.387(13) |
| C13  | C18              | 1.415(15) | B1   | F3               | 1.42(2)   |
| C14  | C15              | 1.43(2)   | B2   | F4               | 1.416(19) |
| C15  | C16 <sup>2</sup> | 1.418(14) | B2   | F5               | 1.409(13) |
| C15  | C16              | 1.418(13) | B2   | F5 <sup>2</sup>  | 1.409(13) |
| C16  | H16              | 0.9500    | B2   | F6               | 1.40(2)   |
| C16  | C17              | 1.366(16) | B3   | F7               | 1.39(2)   |
| C17  | H17              | 0.9500    | B3   | F8               | 1.407(12) |
| C17  | C18              | 1.437(15) | B3   | F8 <sup>1</sup>  | 1.407(12) |
| C18  | H18              | 0.9500    | B3   | F9               | 1.43(2)   |
| S4   | S4 <sup>2</sup>  | 2.049(5)  | B4   | F10              | 1.39(2)   |
| S4   | C19              | 1.725(10) | B4   | F11 <sup>2</sup> | 1.389(14) |
| C19  | C20              | 1.410(13) | B4   | F11              | 1.389(14) |
| C19  | C24              | 1.409(15) | B4   | F12              | 1.39(2)   |
| C20  | C21              | 1.40(2)   | B5   | F13              | 1.39(2)   |
| C21  | C22 <sup>2</sup> | 1.407(14) | B5   | F14              | 1.42(2)   |
| C21  | C22              | 1.407(14) | B5   | F15              | 1.372(14) |
| C22  | H22              | 0.9500    | B5   | F15 <sup>1</sup> | 1.372(14) |
| C22  | C23              | 1.394(16) | B6   | F16              | 1.39(2)   |
| C23  | H23              | 0.9500    | B6   | F17 <sup>2</sup> | 1.403(13) |
| C23  | C24              | 1.387(15) | B6   | F17              | 1.403(13) |
| C24  | H24              | 0.9500    | B6   | F18              | 1.41(2)   |

<sup>1</sup>-X,+Y,+Z; <sup>2</sup>-1-X,+Y,+Z

**Table 5 Bond Angles for [N23]BF<sub>4</sub>.**

| Atom             | Atom | Atom             | Angle/°   | Atom             | Atom | Atom             | Angle/°   |
|------------------|------|------------------|-----------|------------------|------|------------------|-----------|
| C1               | S1   | S1 <sup>1</sup>  | 95.3(4)   | C27              | C26  | C25 <sup>1</sup> | 121.4(7)  |
| C2               | C1   | S1               | 115.9(9)  | C27              | C26  | C25              | 121.4(7)  |
| C2               | C1   | C6               | 121.5(11) | C26              | C27  | C28              | 117.1(8)  |
| C6               | C1   | S1               | 122.5(9)  | C26              | C27  | C28 <sup>1</sup> | 117.1(8)  |
| C1               | C2   | C1 <sup>1</sup>  | 117.4(14) | C28              | C27  | C28 <sup>1</sup> | 125.8(15) |
| C1 <sup>1</sup>  | C2   | C3               | 121.3(7)  | C29              | C28  | C27              | 120.3(11) |
| C1               | C2   | C3               | 121.3(7)  | C30              | C29  | C28              | 122.2(11) |
| C2               | C3   | C4 <sup>1</sup>  | 117.1(7)  | C29              | C30  | C25              | 119.3(11) |
| C2               | C3   | C4               | 117.1(7)  | C31              | S6   | S6 <sup>1</sup>  | 96.2(4)   |
| C4               | C3   | C4 <sup>1</sup>  | 125.8(14) | C32              | C31  | S6               | 113.6(8)  |
| C5               | C4   | C3               | 121.7(11) | C32              | C31  | C36              | 122.5(9)  |
| C4               | C5   | C6               | 121.2(11) | C36              | C31  | S6               | 123.9(8)  |
| C5               | C6   | C1               | 117.2(11) | C31              | C32  | C31 <sup>1</sup> | 120.4(13) |
| C7               | S2   | S2 <sup>1</sup>  | 97.2(4)   | C31 <sup>1</sup> | C32  | C33              | 119.8(7)  |
| C8               | C7   | S2               | 112.9(10) | C31              | C32  | C33              | 119.8(7)  |
| C12              | C7   | S2               | 127.2(10) | C34              | C33  | C32              | 117.2(7)  |
| C12              | C7   | C8               | 119.8(11) | C34 <sup>1</sup> | C33  | C32              | 117.2(7)  |
| C7 <sup>1</sup>  | C8   | C7               | 119.7(15) | C34 <sup>1</sup> | C33  | C34              | 125.6(14) |
| C7               | C8   | C9               | 120.1(7)  | C35              | C34  | C33              | 121.1(10) |
| C7 <sup>1</sup>  | C8   | C9               | 120.1(7)  | C34              | C35  | C36              | 122.2(10) |
| C10 <sup>1</sup> | C9   | C8               | 118.0(7)  | C31              | C36  | C35              | 117.1(10) |
| C10              | C9   | C8               | 118.0(7)  | F1               | B1   | F3               | 107.1(14) |
| C10 <sup>1</sup> | C9   | C10              | 124.0(14) | F2               | B1   | F1               | 109.1(10) |
| C11              | C10  | C9               | 118.8(10) | F2 <sup>1</sup>  | B1   | F1               | 109.1(10) |
| C12              | C11  | C10              | 122.8(11) | F2 <sup>1</sup>  | B1   | F2               | 111.1(14) |
| C7               | C12  | C11              | 120.3(12) | F2 <sup>1</sup>  | B1   | F3               | 110.2(10) |
| C13              | S3   | S3 <sup>2</sup>  | 95.5(4)   | F2               | B1   | F3               | 110.2(10) |
| C14              | C13  | S3               | 115.4(8)  | F5 <sup>2</sup>  | B2   | F4               | 109.4(10) |
| C14              | C13  | C18              | 121.8(9)  | F5               | B2   | F4               | 109.5(10) |
| C18              | C13  | S3               | 122.8(8)  | F5 <sup>2</sup>  | B2   | F5               | 109.1(14) |
| C13              | C14  | C13 <sup>2</sup> | 118.1(13) | F6               | B2   | F4               | 109.8(14) |
| C13 <sup>2</sup> | C14  | C15              | 121.0(6)  | F6               | B2   | F5 <sup>2</sup>  | 109.5(10) |
| C13              | C14  | C15              | 121.0(6)  | F6               | B2   | F5               | 109.5(10) |
| C16 <sup>2</sup> | C15  | C14              | 117.2(8)  | F7               | B3   | F8               | 109.3(9)  |
| C16              | C15  | C14              | 117.2(8)  | F7               | B3   | F8 <sup>1</sup>  | 109.3(9)  |
| C16              | C15  | C16 <sup>2</sup> | 125.3(15) | F7               | B3   | F9               | 109.4(13) |
| C17              | C16  | C15              | 121.2(11) | F8               | B3   | F8 <sup>1</sup>  | 110.8(14) |
| C16              | C17  | C18              | 122.5(11) | F8               | B3   | F9               | 109.1(9)  |
| C13              | C18  | C17              | 116.1(10) | F8 <sup>1</sup>  | B3   | F9               | 109.1(9)  |
| C19              | S4   | S4 <sup>2</sup>  | 96.0(4)   | F11 <sup>2</sup> | B4   | F10              | 108.9(10) |
| C20              | C19  | S4               | 115.3(8)  | F11              | B4   | F10              | 108.9(10) |
| C24              | C19  | S4               | 124.2(8)  | F11              | B4   | F11 <sup>2</sup> | 107.6(15) |
| C24              | C19  | C20              | 120.4(9)  | F11              | B4   | F12              | 111.5(10) |
| C19 <sup>2</sup> | C20  | C19              | 117.4(13) | F11 <sup>2</sup> | B4   | F12              | 111.5(10) |
| C21              | C20  | C19              | 121.3(6)  | F12              | B4   | F10              | 108.4(15) |
| C21              | C20  | C19 <sup>2</sup> | 121.3(7)  | F13              | B5   | F14              | 106.6(15) |

**Table 5 Bond Angles for [N23]BF<sub>4</sub>.**

| Atom | Atom | Atom             | Angle/°   | Atom             | Atom | Atom             | Angle/°   |
|------|------|------------------|-----------|------------------|------|------------------|-----------|
| C20  | C21  | C22              | 117.7(7)  | F15              | B5   | F13              | 109.5(10) |
| C20  | C21  | C22 <sup>2</sup> | 117.7(7)  | F15 <sup>1</sup> | B5   | F13              | 109.5(10) |
| C22  | C21  | C22 <sup>2</sup> | 124.5(14) | F15              | B5   | F14              | 110.0(10) |
| C23  | C22  | C21              | 120.8(10) | F15 <sup>1</sup> | B5   | F14              | 110.0(10) |
| C24  | C23  | C22              | 121.9(11) | F15              | B5   | F15 <sup>1</sup> | 111.0(16) |
| C23  | C24  | C19              | 117.8(10) | F16              | B6   | F17              | 110.4(10) |
| C25  | S5   | S5 <sup>1</sup>  | 96.6(4)   | F16              | B6   | F17 <sup>2</sup> | 110.4(10) |
| C26  | C25  | S5               | 114.8(9)  | F16              | B6   | F18              | 109.2(14) |
| C30  | C25  | S5               | 125.5(9)  | F17              | B6   | F17 <sup>2</sup> | 109.1(15) |
| C30  | C25  | C26              | 119.5(10) | F17 <sup>2</sup> | B6   | F18              | 108.8(10) |
| C25  | C26  | C25 <sup>1</sup> | 117.2(14) | F17              | B6   | F18              | 108.8(10) |

<sup>1</sup>-X,+Y,+Z; <sup>2</sup>-1-X,+Y,+Z

**Table 6 Hydrogen Bonds for [N23]BF<sub>4</sub>.**

| D      | H   | A | d(D-H)/Å | d(H-A)/Å | d(D-A)/Å  | D-H-A/° |
|--------|-----|---|----------|----------|-----------|---------|
| C18H18 | F2  |   | 0.95     | 2.45     | 3.204(13) | 136.2   |
| C24H24 | F7  |   | 0.95     | 2.34     | 3.189(12) | 147.9   |
| C24H24 | F8  |   | 0.95     | 2.50     | 3.245(13) | 135.4   |
| C30H30 | F17 |   | 0.95     | 2.51     | 3.257(14) | 135.7   |
| C34H34 | F15 |   | 0.95     | 2.61     | 3.226(12) | 122.5   |
| C36H36 | F11 |   | 0.95     | 2.53     | 3.285(14) | 136.2   |
| C36H36 | F12 |   | 0.95     | 2.35     | 3.192(13) | 147.6   |

**Table 7 Torsion Angles for [N23]BF<sub>4</sub>.**

| A               | B  | C  | D               | Angle/°    | A                | B   | C   | D                | Angle/°    |
|-----------------|----|----|-----------------|------------|------------------|-----|-----|------------------|------------|
| S1 <sup>1</sup> | S1 | C1 | C2              | -1.5(10)   | S4 <sup>2</sup>  | S4  | C19 | C20              | -0.4(9)    |
| S1 <sup>1</sup> | S1 | C1 | C6              | -178.6(9)  | S4 <sup>2</sup>  | S4  | C19 | C24              | -179.4(9)  |
| S1              | C1 | C2 | C1 <sup>1</sup> | 3.0(19)    | S4               | C19 | C20 | C19 <sup>2</sup> | 0.8(18)    |
| S1              | C1 | C2 | C3              | 180.0(11)  | S4               | C19 | C20 | C21              | -178.7(11) |
| S1              | C1 | C6 | C5              | 179.1(8)   | S4               | C19 | C24 | C23              | 178.8(8)   |
| C1              | C2 | C3 | C4              | 1(2)       | C19              | C20 | C21 | C22 <sup>2</sup> | 179.1(12)  |
| C1 <sup>1</sup> | C2 | C3 | C4 <sup>1</sup> | -1(2)      | C19 <sup>2</sup> | C20 | C21 | C22              | -179.1(12) |
| C1 <sup>1</sup> | C2 | C3 | C4              | 177.5(13)  | C19              | C20 | C21 | C22              | 0(2)       |
| C1              | C2 | C3 | C4 <sup>1</sup> | -177.5(13) | C19 <sup>2</sup> | C20 | C21 | C22 <sup>2</sup> | 0(2)       |
| C2              | C1 | C6 | C5              | 2.2(17)    | C20              | C19 | C24 | C23              | -0.1(16)   |
| C2              | C3 | C4 | C5              | 2(2)       | C20              | C21 | C22 | C23              | -1.3(19)   |
| C3              | C4 | C5 | C6              | -3.1(19)   | C21              | C22 | C23 | C24              | 1.6(17)    |
| C4 <sup>1</sup> | C3 | C4 | C5              | -179.7(11) | C22 <sup>2</sup> | C21 | C22 | C23              | -180.0(9)  |
| C4              | C5 | C6 | C1              | 0.7(17)    | C22              | C23 | C24 | C19              | -0.9(15)   |
| C6              | C1 | C2 | C1 <sup>1</sup> | -179.9(8)  | C24              | C19 | C20 | C19 <sup>2</sup> | 179.8(8)   |
| C6              | C1 | C2 | C3              | -3(2)      | C24              | C19 | C20 | C21              | 0.3(19)    |
| S2 <sup>1</sup> | S2 | C7 | C8              | -1.0(10)   | S5 <sup>1</sup>  | S5  | C25 | C26              | 0.9(10)    |

**Table 7 Torsion Angles for [N23]BF<sub>4</sub>.**

| A                | B   | C   | D                | Angle/°    | A                | B   | C   | D                | Angle/°    |
|------------------|-----|-----|------------------|------------|------------------|-----|-----|------------------|------------|
| S2 <sup>1</sup>  | S2  | C7  | C12              | -180.0(10) | S5 <sup>1</sup>  | S5  | C25 | C30              | 177.5(10)  |
| S2               | C7  | C8  | C7 <sup>1</sup>  | 1.9(19)    | S5               | C25 | C26 | C25 <sup>1</sup> | -2(2)      |
| S2               | C7  | C8  | C9               | 179.2(11)  | S5               | C25 | C26 | C27              | 177.1(12)  |
| S2               | C7  | C12 | C11              | -179.4(8)  | S5               | C25 | C30 | C29              | -177.6(9)  |
| C7               | C8  | C9  | C10              | 1(2)       | C25 <sup>1</sup> | C26 | C27 | C28 <sup>1</sup> | 0(2)       |
| C7 <sup>1</sup>  | C8  | C9  | C10              | 178.7(12)  | C25              | C26 | C27 | C28 <sup>1</sup> | -178.9(13) |
| C7 <sup>1</sup>  | C8  | C9  | C10 <sup>1</sup> | -1(2)      | C25              | C26 | C27 | C28              | 0(2)       |
| C7               | C8  | C9  | C10 <sup>1</sup> | -178.7(12) | C25 <sup>1</sup> | C26 | C27 | C28              | 178.9(13)  |
| C8               | C7  | C12 | C11              | 1.7(17)    | C26              | C25 | C30 | C29              | -1.2(17)   |
| C8               | C9  | C10 | C11              | -1.0(19)   | C26              | C27 | C28 | C29              | 0.5(19)    |
| C9               | C10 | C11 | C12              | 1.1(17)    | C27              | C28 | C29 | C30              | -1.4(17)   |
| C10 <sup>1</sup> | C9  | C10 | C11              | 179.0(9)   | C28 <sup>1</sup> | C27 | C28 | C29              | 179.3(10)  |
| C10              | C11 | C12 | C7               | -1.4(17)   | C28              | C29 | C30 | C25              | 1.8(17)    |
| C12              | C7  | C8  | C7 <sup>1</sup>  | -179.0(9)  | C30              | C25 | C26 | C25 <sup>1</sup> | -178.6(9)  |
| C12              | C7  | C8  | C9               | -2(2)      | C30              | C25 | C26 | C27              | 0(2)       |
| S3 <sup>2</sup>  | S3  | C13 | C14              | 0.2(9)     | S6 <sup>1</sup>  | S6  | C31 | C32              | -1.0(9)    |
| S3 <sup>2</sup>  | S3  | C13 | C18              | -178.2(8)  | S6 <sup>1</sup>  | S6  | C31 | C36              | -178.8(9)  |
| S3               | C13 | C14 | C13 <sup>2</sup> | -0.4(18)   | S6               | C31 | C32 | C31 <sup>1</sup> | 2.0(19)    |
| S3               | C13 | C14 | C15              | -178.6(11) | S6               | C31 | C32 | C33              | -178.8(10) |
| S3               | C13 | C18 | C17              | 179.5(8)   | S6               | C31 | C36 | C35              | 178.1(8)   |
| C13              | C14 | C15 | C16              | 2(2)       | C31 <sup>1</sup> | C32 | C33 | C34 <sup>1</sup> | 0.1(19)    |
| C13              | C14 | C15 | C16 <sup>2</sup> | 176.2(12)  | C31              | C32 | C33 | C34 <sup>1</sup> | -179.1(12) |
| C13 <sup>2</sup> | C14 | C15 | C16 <sup>2</sup> | -2(2)      | C31              | C32 | C33 | C34              | -0.1(19)   |
| C13 <sup>2</sup> | C14 | C15 | C16              | -176.2(12) | C31 <sup>1</sup> | C32 | C33 | C34              | 179.1(12)  |
| C14              | C13 | C18 | C17              | 1.2(16)    | C32              | C31 | C36 | C35              | 0.5(16)    |
| C14              | C15 | C16 | C17              | -5.0(19)   | C32              | C33 | C34 | C35              | 1.7(18)    |
| C15              | C16 | C17 | C18              | 6.3(18)    | C33              | C34 | C35 | C36              | -2.3(17)   |
| C16 <sup>2</sup> | C15 | C16 | C17              | -178.7(10) | C34 <sup>1</sup> | C33 | C34 | C35              | -179.4(9)  |
| C16              | C17 | C18 | C13              | -4.2(16)   | C34              | C35 | C36 | C31              | 1.1(15)    |
| C18              | C13 | C14 | C13 <sup>2</sup> | 178.1(8)   | C36              | C31 | C32 | C31 <sup>1</sup> | 179.8(9)   |
| C18              | C13 | C14 | C15              | -0.2(19)   | C36              | C31 | C32 | C33              | -1.0(19)   |

<sup>1</sup>-X,+Y,+Z; <sup>2</sup>-1-X,+Y,+Z

**Table 8 Hydrogen Atom Coordinates (Å×10<sup>4</sup>) and Isotropic Displacement Parameters (Å<sup>2</sup>×10<sup>3</sup>) for [N23]BF<sub>4</sub>.**

| Atom | x        | y        | z        | U(eq) |
|------|----------|----------|----------|-------|
| H4   | -1276.41 | -5321.04 | -4802.69 | 31    |
| H5   | -3229.41 | -5047.2  | -4549.47 | 28    |
| H6   | -3213.77 | -4830.41 | -4045.52 | 22    |
| H10  | -1285.91 | -9267.21 | -3360.14 | 21    |
| H11  | -3238.87 | -9366.05 | -3631.04 | 20    |
| H12  | -3215.44 | -9717.24 | -4121.08 | 24    |
| H16  | -3721.52 | -4436.33 | -6492.89 | 23    |
| H17  | -1790.84 | -3900.31 | -6249.05 | 24    |



**Table 8 Hydrogen Atom Coordinates ( $\text{\AA}\times 10^4$ ) and Isotropic Displacement Parameters ( $\text{\AA}^2\times 10^3$ ) for [N23]BF<sub>4</sub>.**

| Atom | x        | y        | z        | U(eq) |
|------|----------|----------|----------|-------|
| H18  | -1770.42 | -3458.75 | -5741.72 | 16    |
| H22  | -3737.78 | -7341.09 | -5014.41 | 23    |
| H23  | -1776.53 | -7704.81 | -5267.54 | 22    |
| H24  | -1775.37 | -8239.09 | -5760.47 | 15    |
| H28  | -1301.18 | -1209.59 | -6671.74 | 23    |
| H29  | -3249.85 | -1592.94 | -6932.48 | 20    |
| H30  | -3226.21 | -2159.18 | -7416.64 | 24    |
| H34  | -1281.67 | -8276.32 | -8165.14 | 20    |
| H35  | -3230.96 | -7882.44 | -7912.45 | 19    |
| H36  | -3232.36 | -7380.83 | -7413.56 | 20    |

### References to the Crystallographic Section

- (1) CrystalClear: Data Collection and Processing Software, Rigaku Corporation (1998-2015). Tokyo 196-8666, Japan.
- (2) SHELXS97: Sheldrick, G. M. (2008). *Acta Cryst.* A64, 112-122.
- (3) Least Squares function minimized: (SHELXL Version 2018/3)  

$$Sw(Fo2-Fc2)^2$$
 where w = Least Squares weights.
- (4) Goodness of fit is defined as:  

$$[Sw(Fo2-Fc2)^2/(No-Nv)]^{1/2}$$
 where: No = number of observations  
 Nv = number of variables
- (5) International Tables for Crystallography, Vol.C (1992). Ed. A.J.C. Wilson, Kluwer Academic Publishers, Dordrecht, Netherlands, Table 6.1.1.4, pp. 572.
- (6) Ibers, J. A. & Hamilton, W. C.; *Acta Crystallogr.*, 17, 781 (1964).
- (7) Creagh, D. C. & McAuley, W.J. ; "International Tables for Crystallography", Vol C, (A.J.C. Wilson, ed.), Kluwer Academic Publishers, Boston, Table 4.2.6.8, pages 219-222 (1992).
- (8) Creagh, D. C. & Hubbell, J.H.; "International Tables for Crystallography", Vol C, (A.J.C. Wilson, ed.), Kluwer Academic Publishers, Boston, Table 4.2.4.3, pages 200-206 (1992).
- (9) CrystalStructure 4.3: Crystal Structure Analysis Package, Rigaku Corporation (2000-2019). Tokyo 196-8666, Japan.
- (10) SHELXL Version 2018/3: Sheldrick, G. M. (2008). *Acta Cryst.* A64, 112-122.
- (11) L . J. Bourhis, O. V. Dolomanov, R. J. Gildea, J. A. K. Howard, H. Puschmann, *Acta Crystallogr., Sect. A: Found. Crystallogr.* 2015, A71, 59.
